# Supplementary material for: Parental encouragement is positively associated with outdoor active play outside of school hours among 7–12 year olds
Source: PeerJ. 2015 Nov 30;3:e1463. doi: 10.7717/peerj.1463 (PMC4671172; doi:10.7717/peerj.1463)
Supplement: Data S1 [file peerj-03-1463-s001.xlsx]

## Sheet: raw data
@_key	@_completed	@_id	@_language	@_created_at	@_updated_at	@_locale	@_browser_name	@_device_type	@_username	@_get_variables	@_referrer	@_saves	@_weighted_score	@_pagepath	@_completion_time	@_ip_address	@_invite_code	@_invite_email	@_invite_name	@_collector_id	q_q1_score	q_q2_score	q_q3_score	q_q4_0	q_q4_1	q_q4_2	q_q4_3	q_q4_4	q_q4_5	q_q4_6	q_q4_7	q_q5_score	q_q6_0_score	q_q6_1_score	q_q6_2_score	q_q6_3_score	q_q6_4_score	q_q6_5_score	q_q6_6_score	q_q7_0_score	q_q7_1_score	q_q7_2_score	q_q7_3_score	q_q7_4_score	q_q7_5_score	q_q7_6_score	q_q7_7_score	q_q8_score	q_q9_score
yzhnjg944s1d2pfkjqfd9xfu31xelx8p	0	24843869	en	2014/11/24 1:01:01 PM	2014/11/24 1:01:01 PM	Oklahoma	Firefox	Other		sample-provider=Cint&respondent=2d3736bc-e5d1-452e-b064-dbb4ab38d527	http://s.cint.com/Survey/Fingerprint/2d3736bc-e5d1-452e-b064-dbb4ab38d527?sq=1		0	[1, 2]		192.173.34.201					#NULL!	#NULL!	#NULL!	#NULL!	#NULL!	#NULL!	#NULL!	#NULL!	#NULL!	#NULL!	#NULL!	#NULL!	#NULL!	#NULL!	#NULL!	#NULL!	#NULL!	#NULL!	#NULL!	#NULL!	#NULL!	#NULL!	#NULL!	#NULL!	#NULL!	#NULL!	#NULL!	#NULL!	#NULL!
ckbqtafdecuamem6i5fu1rnjz4arymi5	0	24845135	en	2014/11/24 1:16:47 PM	2014/11/24 1:16:47 PM	Illinois	Google Chrome	Other		sample-provider=Cint&respondent=d18c8d7e-ae22-4d0e-998b-7f9c42c52f76	http://s.cint.com/Survey/Fingerprint/d18c8d7e-ae22-4d0e-998b-7f9c42c52f76?sq=1		0	[1, 2]		24.14.147.42					#NULL!	#NULL!	#NULL!	#NULL!	#NULL!	#NULL!	#NULL!	#NULL!	#NULL!	#NULL!	#NULL!	#NULL!	#NULL!	#NULL!	#NULL!	#NULL!	#NULL!	#NULL!	#NULL!	#NULL!	#NULL!	#NULL!	#NULL!	#NULL!	#NULL!	#NULL!	#NULL!	#NULL!	#NULL!
bh92ndg65iec3s3gyxlgquqvocm4xd85	0	24845807	en	2014/11/24 1:25:45 PM	2014/11/24 1:25:45 PM	United States	Google Chrome	Other		sample-provider=Cint&respondent=a5f956e7-88ef-47fc-af05-9003b4438154	http://s.cint.com/Survey/Fingerprint/a5f956e7-88ef-47fc-af05-9003b4438154?sq=1		0	[1, 2]		4.31.157.66					#NULL!	#NULL!	#NULL!	#NULL!	#NULL!	#NULL!	#NULL!	#NULL!	#NULL!	#NULL!	#NULL!	#NULL!	#NULL!	#NULL!	#NULL!	#NULL!	#NULL!	#NULL!	#NULL!	#NULL!	#NULL!	#NULL!	#NULL!	#NULL!	#NULL!	#NULL!	#NULL!	#NULL!	#NULL!
zbk7xga1bgb2i1fl9yosln5ie4ma0ajy	0	24847203	en	2014/11/24 1:37:22 PM	2014/11/24 1:37:22 PM	Texas	Google Chrome	Other		sample-provider=Cint&respondent=8ce1a2ed-45dc-4a81-8736-e40a16575eb8	http://s.cint.com/Survey/Fingerprint/8ce1a2ed-45dc-4a81-8736-e40a16575eb8?sq=1		0	[1, 2]		68.203.209.200					#NULL!	#NULL!	#NULL!	#NULL!	#NULL!	#NULL!	#NULL!	#NULL!	#NULL!	#NULL!	#NULL!	#NULL!	#NULL!	#NULL!	#NULL!	#NULL!	#NULL!	#NULL!	#NULL!	#NULL!	#NULL!	#NULL!	#NULL!	#NULL!	#NULL!	#NULL!	#NULL!	#NULL!	#NULL!
eiow39o5sxbb6vwpjz7ykrb77nlp4g2b	0	24848673	en	2014/11/24 1:52:22 PM	2014/11/24 1:54:01 PM	Maryland	Google Chrome	Android		sample-provider=Cint&respondent=51c2e9ce-8e5b-4a65-b38c-77892fbe19f5	http://s.cint.com/Survey/Fingerprint/51c2e9ce-8e5b-4a65-b38c-77892fbe19f5?sq=1		0	[1]	00:00:24	66.87.80.153					#NULL!	#NULL!	#NULL!	#NULL!	#NULL!	#NULL!	#NULL!	#NULL!	#NULL!	#NULL!	#NULL!	#NULL!	#NULL!	#NULL!	#NULL!	#NULL!	#NULL!	#NULL!	#NULL!	#NULL!	#NULL!	#NULL!	#NULL!	#NULL!	#NULL!	#NULL!	#NULL!	#NULL!	#NULL!
d5knm1t7afzo6rzg43brzg9w2rrnm7bv	0	24849333	en	2014/11/24 1:57:55 PM	2014/11/24 1:57:55 PM	United States	Safari	iPhone/iPod		sample-provider=Cint&respondent=a6c8cfbd-d46c-44f1-9b34-3c2daad8f4b4	http://s.cint.com/Survey/Fingerprint/a6c8cfbd-d46c-44f1-9b34-3c2daad8f4b4?sq=1		0	[1, 2]		107.145.182.81					#NULL!	#NULL!	#NULL!	#NULL!	#NULL!	#NULL!	#NULL!	#NULL!	#NULL!	#NULL!	#NULL!	#NULL!	#NULL!	#NULL!	#NULL!	#NULL!	#NULL!	#NULL!	#NULL!	#NULL!	#NULL!	#NULL!	#NULL!	#NULL!	#NULL!	#NULL!	#NULL!	#NULL!	#NULL!
ip4d2rguue96uth1ucjsaj1kvfzjn9op	0	24882163	en	2014/11/24 10:28:16 PM	2014/11/24 10:28:16 PM	United States	Google Chrome	Android		sample-provider=Cint&respondent=8c19df7c-339e-4728-b8b8-f4c5cb3f0a42	http://s.cint.com/Survey/Fingerprint/8c19df7c-339e-4728-b8b8-f4c5cb3f0a42?sq=1		0	[1, 2]		68.207.119.21					#NULL!	#NULL!	#NULL!	#NULL!	#NULL!	#NULL!	#NULL!	#NULL!	#NULL!	#NULL!	#NULL!	#NULL!	#NULL!	#NULL!	#NULL!	#NULL!	#NULL!	#NULL!	#NULL!	#NULL!	#NULL!	#NULL!	#NULL!	#NULL!	#NULL!	#NULL!	#NULL!	#NULL!	#NULL!
j147j8i3phnojgf7r0unoareexmdh26w	0	24883053	en	2014/11/24 10:52:32 PM	2014/11/24 10:52:32 PM	Michigan	Google Chrome	Android		sample-provider=Cint&respondent=699422f6-fb83-4df8-bb2e-df84c5acd1bf	http://s.cint.com/Survey/Fingerprint/699422f6-fb83-4df8-bb2e-df84c5acd1bf?sq=1		0	[1, 2]		150.198.16.51					#NULL!	#NULL!	#NULL!	#NULL!	#NULL!	#NULL!	#NULL!	#NULL!	#NULL!	#NULL!	#NULL!	#NULL!	#NULL!	#NULL!	#NULL!	#NULL!	#NULL!	#NULL!	#NULL!	#NULL!	#NULL!	#NULL!	#NULL!	#NULL!	#NULL!	#NULL!	#NULL!	#NULL!	#NULL!
i8fi6e97lscxkv9r4xcl9upvzmkt7uuv	0	24833357	en	2014/11/24 11:22:01 AM	2014/11/24 11:23:51 AM	United States	Firefox	Other		sample-provider=Cint&respondent=75be30a9-1afa-4aae-8972-96f1db28d950	http://s.cint.com/Survey/Fingerprint/75be30a9-1afa-4aae-8972-96f1db28d950		0	[1, 2]		64.134.153.160					#NULL!	#NULL!	#NULL!	#NULL!	#NULL!	#NULL!	#NULL!	#NULL!	#NULL!	#NULL!	#NULL!	#NULL!	#NULL!	#NULL!	#NULL!	#NULL!	#NULL!	#NULL!	#NULL!	#NULL!	#NULL!	#NULL!	#NULL!	#NULL!	#NULL!	#NULL!	#NULL!	#NULL!	#NULL!
pc57dzwtt3e60mkeprxbftbbdlg81zv8	0	24836121	en	2014/11/24 11:47:58 AM	2014/11/24 11:47:58 AM	Illinois	Google Chrome	Other		sample-provider=Cint&respondent=daac9c14-c1b8-4a8a-bf17-a16b867b16af	http://s.cint.com/Survey/Fingerprint/daac9c14-c1b8-4a8a-bf17-a16b867b16af?sq=1		0	[1, 2]		50.178.248.37					#NULL!	#NULL!	#NULL!	#NULL!	#NULL!	#NULL!	#NULL!	#NULL!	#NULL!	#NULL!	#NULL!	#NULL!	#NULL!	#NULL!	#NULL!	#NULL!	#NULL!	#NULL!	#NULL!	#NULL!	#NULL!	#NULL!	#NULL!	#NULL!	#NULL!	#NULL!	#NULL!	#NULL!	#NULL!
db4rx1iw4c7zfqtqf2dqhwok2384yvs5	0	24836613	en	2014/11/24 11:51:56 AM	2014/11/24 11:51:56 AM	Missouri	Internet Explorer	Other		sample-provider=Cint&respondent=ac6ab974-bd5f-4fe8-a673-4ef29db8ca0c	http://s.cint.com/Survey/Fingerprint/ac6ab974-bd5f-4fe8-a673-4ef29db8ca0c?sq=1		0	[1, 2]		96.35.51.110					#NULL!	#NULL!	#NULL!	#NULL!	#NULL!	#NULL!	#NULL!	#NULL!	#NULL!	#NULL!	#NULL!	#NULL!	#NULL!	#NULL!	#NULL!	#NULL!	#NULL!	#NULL!	#NULL!	#NULL!	#NULL!	#NULL!	#NULL!	#NULL!	#NULL!	#NULL!	#NULL!	#NULL!	#NULL!
fqmrhi1ahs18pvrlonyu37nd2r9ouccl	0	24842343	en	2014/11/24 12:44:51 PM	2014/11/24 12:44:52 PM	Louisiana	Internet Explorer	Other		sample-provider=Cint&respondent=b640fc80-4715-4cda-856f-7f9dec4999fc	http://s.cint.com/Survey/Fingerprint/b640fc80-4715-4cda-856f-7f9dec4999fc?sq=1		0	[1, 2]		24.248.66.84					#NULL!	#NULL!	#NULL!	#NULL!	#NULL!	#NULL!	#NULL!	#NULL!	#NULL!	#NULL!	#NULL!	#NULL!	#NULL!	#NULL!	#NULL!	#NULL!	#NULL!	#NULL!	#NULL!	#NULL!	#NULL!	#NULL!	#NULL!	#NULL!	#NULL!	#NULL!	#NULL!	#NULL!	#NULL!
rgnxfv5xbja8oiqsstuwknlmmbo0jt8c	0	24865521	en	2014/11/24 5:35:10 PM	2014/11/24 5:35:10 PM	Wisconsin	Firefox	Other		sample-provider=Cint&respondent=1ff8c8fa-8d18-46f2-87bf-a45140acacd3	http://s.cint.com/Survey/Fingerprint/1ff8c8fa-8d18-46f2-87bf-a45140acacd3?sq=1		0	[1, 2]		71.95.69.220					#NULL!	#NULL!	#NULL!	#NULL!	#NULL!	#NULL!	#NULL!	#NULL!	#NULL!	#NULL!	#NULL!	#NULL!	#NULL!	#NULL!	#NULL!	#NULL!	#NULL!	#NULL!	#NULL!	#NULL!	#NULL!	#NULL!	#NULL!	#NULL!	#NULL!	#NULL!	#NULL!	#NULL!	#NULL!
ngt8qy1cvujxxk2a9aue3lzfscymuz41	0	24808109	en	2014/11/24 6:17:39 AM	2014/11/24 6:17:39 AM	Texas	Firefox	Other		sample-provider=Cint&respondent=a60b0abd-7796-4b79-a2ba-d9d20e986334	http://s.cint.com/Survey/Fingerprint/a60b0abd-7796-4b79-a2ba-d9d20e986334		0	[1, 2]		75.108.45.129					#NULL!	#NULL!	#NULL!	#NULL!	#NULL!	#NULL!	#NULL!	#NULL!	#NULL!	#NULL!	#NULL!	#NULL!	#NULL!	#NULL!	#NULL!	#NULL!	#NULL!	#NULL!	#NULL!	#NULL!	#NULL!	#NULL!	#NULL!	#NULL!	#NULL!	#NULL!	#NULL!	#NULL!	#NULL!
t4snzolgr1lgurqenec86cxnv0l0z7kc	0	24817363	en	2014/11/24 8:50:37 AM	2014/11/24 8:50:37 AM	Kentucky	Safari	iPad		sample-provider=Cint&respondent=09ced7f2-3236-4049-8564-839ff365e7d3	http://s.cint.com/Survey/Fingerprint/09ced7f2-3236-4049-8564-839ff365e7d3		0	[1, 2]		74.128.166.234					#NULL!	#NULL!	#NULL!	#NULL!	#NULL!	#NULL!	#NULL!	#NULL!	#NULL!	#NULL!	#NULL!	#NULL!	#NULL!	#NULL!	#NULL!	#NULL!	#NULL!	#NULL!	#NULL!	#NULL!	#NULL!	#NULL!	#NULL!	#NULL!	#NULL!	#NULL!	#NULL!	#NULL!	#NULL!
a4u0dx7vawmwaru0w38pod8l099dx7r9	0	24817935	en	2014/11/24 8:58:33 AM	2014/11/24 8:58:33 AM	Texas	Google Chrome	Other		sample-provider=Cint&respondent=f9f6d9fb-06f2-4b80-8f18-18888d7f15ca	http://s.cint.com/Survey/Fingerprint/f9f6d9fb-06f2-4b80-8f18-18888d7f15ca?sq=1		0	[1, 2]		129.7.115.1					#NULL!	#NULL!	#NULL!	#NULL!	#NULL!	#NULL!	#NULL!	#NULL!	#NULL!	#NULL!	#NULL!	#NULL!	#NULL!	#NULL!	#NULL!	#NULL!	#NULL!	#NULL!	#NULL!	#NULL!	#NULL!	#NULL!	#NULL!	#NULL!	#NULL!	#NULL!	#NULL!	#NULL!	#NULL!
790toh8yrkebwhuvtg9szxo6c9l4tp16	0	24820773	en	2014/11/24 9:25:33 AM	2014/11/24 9:25:33 AM	United States	Google Chrome	Android		sample-provider=Cint&respondent=9f7fc93e-6137-4ce3-a891-39ce03d7a3ff	http://s.cint.com/Survey/Fingerprint/9f7fc93e-6137-4ce3-a891-39ce03d7a3ff?sq=1		0	[1, 2]		75.140.195.190					#NULL!	#NULL!	#NULL!	#NULL!	#NULL!	#NULL!	#NULL!	#NULL!	#NULL!	#NULL!	#NULL!	#NULL!	#NULL!	#NULL!	#NULL!	#NULL!	#NULL!	#NULL!	#NULL!	#NULL!	#NULL!	#NULL!	#NULL!	#NULL!	#NULL!	#NULL!	#NULL!	#NULL!	#NULL!
gkjjgvnurfjivgm59akd951nqt04mkfq	0	24821365	en	2014/11/24 9:31:59 AM	2014/11/24 9:31:59 AM	Texas	Firefox	Other		sample-provider=Cint&respondent=ea43e035-2e94-4172-9ce8-4f5f5c2b93a1	http://s.cint.com/Survey/Fingerprint/ea43e035-2e94-4172-9ce8-4f5f5c2b93a1?sq=1		0	[1, 2]		216.201.181.130					#NULL!	#NULL!	#NULL!	#NULL!	#NULL!	#NULL!	#NULL!	#NULL!	#NULL!	#NULL!	#NULL!	#NULL!	#NULL!	#NULL!	#NULL!	#NULL!	#NULL!	#NULL!	#NULL!	#NULL!	#NULL!	#NULL!	#NULL!	#NULL!	#NULL!	#NULL!	#NULL!	#NULL!	#NULL!
itxtxlqjafmiu7h9l6cw2h9l8jyqvpa1	0	24817095	en	2014/11/24 8:46:25 AM	2014/11/24 8:46:51 AM	Oklahoma	Internet Explorer	Other		sample-provider=Cint&respondent=645c024f-9b72-4419-98f5-ce63e07d94f4	http://queensu.fluidsurveys.com/surveys/dr-janssen/parental-influence-and-active-play-1/?sample-provider=Cint&respondent=645c024f-9b72-4419-98f5-ce63e07d94f4		0	[1]		216.60.18.40					0	#NULL!	#NULL!	#NULL!	#NULL!	#NULL!	#NULL!	#NULL!	#NULL!	#NULL!	#NULL!	#NULL!	#NULL!	#NULL!	#NULL!	#NULL!	#NULL!	#NULL!	#NULL!	#NULL!	#NULL!	#NULL!	#NULL!	#NULL!	#NULL!	#NULL!	#NULL!	#NULL!	#NULL!
5txe0suy7j7khzt6b8fn4du8t5pot4hu	0	24830271	en	2014/11/24 10:52:26 AM	2014/11/24 10:52:52 AM	Ohio	Google Chrome	Other		sample-provider=Cint&respondent=83fbf359-b7af-4a97-b58d-70f07e2bfe72	http://s.cint.com/Survey/Fingerprint/83fbf359-b7af-4a97-b58d-70f07e2bfe72?sq=1		2013.0	[1, 2, 3]	00:00:26	71.64.144.30					0	2003	8	0	#NULL!	2	#NULL!	#NULL!	#NULL!	#NULL!	#NULL!	0	#NULL!	#NULL!	#NULL!	#NULL!	#NULL!	#NULL!	#NULL!	#NULL!	#NULL!	#NULL!	#NULL!	#NULL!	#NULL!	#NULL!	#NULL!	#NULL!	#NULL!
7vgyw5tbszkenxay4goalab7h2w8lbxc	0	24873837	en	2014/11/24 7:48:31 PM	2014/11/24 9:10:00 PM	New York	Google Chrome	Other		sample-provider=Cint&respondent=b29a8a87-0870-43b5-b78b-9449a5bd856a	http://s.cint.com/Survey/Fingerprint/b29a8a87-0870-43b5-b78b-9449a5bd856a?sq=1		2038.0	[1, 2, 3, 4, 5]	01:21:29	66.65.147.242					1	2003	2	0	1	#NULL!	#NULL!	#NULL!	#NULL!	#NULL!	#NULL!	0	3	0	0	0	2	2	2	5	5	0	0	2	2	2	2	0	4
8bxuk44fme5tntcfijsf1ugqq9lqmhj2	0	24817639	en	2014/11/24 8:55:23 AM	2014/11/24 8:56:03 AM	Michigan	Internet Explorer	Other		sample-provider=Cint&respondent=772eba0c-a790-4190-9076-4572b98e709b	http://s.cint.com/Survey/Fingerprint/772eba0c-a790-4190-9076-4572b98e709b		2024.0	[1, 2, 3, 4]	00:00:40	173.241.221.20					1	2007	1	#NULL!	1	2	#NULL!	#NULL!	#NULL!	#NULL!	#NULL!	0	5	0	0	0	2	5	0	#NULL!	#NULL!	#NULL!	#NULL!	#NULL!	#NULL!	#NULL!	#NULL!	#NULL!	#NULL!
oo1bq9hp3v7boxjwpdjyr6gt7mz3hhmm	0	24888091	en	2014/11/25 1:14:09 AM	2014/11/25 1:14:33 AM	United States	Firefox	Other		sample-provider=Cint&respondent=fb749117-1235-45d5-b656-a8fbd360f362	http://s.cint.com/Survey/Fingerprint/fb749117-1235-45d5-b656-a8fbd360f362?sq=1		2020.0	[1, 2, 3]	00:00:23	69.171.176.76					0	2007	12	#NULL!	1	#NULL!	#NULL!	#NULL!	#NULL!	#NULL!	#NULL!	0	#NULL!	#NULL!	#NULL!	#NULL!	#NULL!	#NULL!	#NULL!	#NULL!	#NULL!	#NULL!	#NULL!	#NULL!	#NULL!	#NULL!	#NULL!	#NULL!	#NULL!
6jc92jli5wrbqdt024c7zqrzfd89l3ba	0	24831437	en	2014/11/24 11:02:33 AM	2014/11/24 11:04:11 AM	Ohio	Google Chrome	Other		sample-provider=Cint&respondent=2c108ab2-f89a-4233-bd73-625670f96be5	http://s.cint.com/Survey/Fingerprint/2c108ab2-f89a-4233-bd73-625670f96be5?sq=1		2023.0	[1, 2, 3, 4]	00:01:38	129.137.220.12					0	2006	2	#NULL!	1	#NULL!	#NULL!	#NULL!	#NULL!	#NULL!	#NULL!	1	2	2	1	0	3	4	1	#NULL!	#NULL!	#NULL!	#NULL!	#NULL!	#NULL!	#NULL!	#NULL!	#NULL!	#NULL!
zb24fryot4gec3td8nsiwrxd6dnp9e58	0	24844727	en	2014/11/24 1:12:10 PM	2014/11/24 1:15:55 PM	Colorado	Google Chrome	Other		sample-provider=Cint&respondent=997cc065-75e0-42b6-ad21-e83f3c29880b	http://s.cint.com/Survey/Fingerprint/997cc065-75e0-42b6-ad21-e83f3c29880b?sq=1		2019.0	[1, 2, 3, 4]	00:03:45	8.36.225.230					0	2003	4	0	#NULL!	#NULL!	#NULL!	#NULL!	#NULL!	#NULL!	#NULL!	1	2	2	1	0	1	2	3	#NULL!	#NULL!	#NULL!	#NULL!	#NULL!	#NULL!	#NULL!	#NULL!	#NULL!	#NULL!
d177a2dvew4etfnnqs4yc4e923xdxpwn	0	24831275	en	2014/11/24 11:01:23 AM	2014/11/24 11:02:11 AM	Arizona	Google Chrome	Other		sample-provider=Cint&respondent=a03c4b96-de6a-4f09-a2f8-2eff13905f10	http://s.cint.com/Survey/Fingerprint/a03c4b96-de6a-4f09-a2f8-2eff13905f10?sq=1		2011.0	[1, 2, 3]	00:00:48	184.8.132.140					0	2003	7	0	#NULL!	#NULL!	#NULL!	#NULL!	#NULL!	#NULL!	#NULL!	1	#NULL!	#NULL!	#NULL!	#NULL!	#NULL!	#NULL!	#NULL!	#NULL!	#NULL!	#NULL!	#NULL!	#NULL!	#NULL!	#NULL!	#NULL!	#NULL!	#NULL!
flziss1kdhhz68xnlifh2v29x8ijk5mx	0	24887483	en	2014/11/25 12:42:38 AM	2014/11/25 12:44:26 AM	New Jersey	Google Chrome	Other		sample-provider=Cint&respondent=fa6dc7df-ffd3-4f61-8aac-e5de5dc5eb35	http://s.cint.com/Survey/Fingerprint/fa6dc7df-ffd3-4f61-8aac-e5de5dc5eb35?sq=1		2012.0	[1, 2]	00:01:03	98.110.119.193					0	2003	9	0	#NULL!	#NULL!	#NULL!	#NULL!	#NULL!	#NULL!	#NULL!	0	#NULL!	#NULL!	#NULL!	#NULL!	#NULL!	#NULL!	#NULL!	#NULL!	#NULL!	#NULL!	#NULL!	#NULL!	#NULL!	#NULL!	#NULL!	#NULL!	#NULL!
8d0ob3x9fvi6dy7srhn0h4h8sl5o496r	0	24873871	en	2014/11/24 7:49:15 PM	2014/11/24 7:49:43 PM	United States	Google Chrome	Other		sample-provider=Cint&respondent=16b49222-d2a4-46fc-aa37-24d90b059b3a	http://s.cint.com/Survey/Fingerprint/16b49222-d2a4-46fc-aa37-24d90b059b3a?sq=1		2013.0	[1, 2]	00:00:05	172.191.5.18					1	2005	6	0	#NULL!	#NULL!	#NULL!	#NULL!	#NULL!	#NULL!	#NULL!	1	#NULL!	#NULL!	#NULL!	#NULL!	#NULL!	#NULL!	#NULL!	#NULL!	#NULL!	#NULL!	#NULL!	#NULL!	#NULL!	#NULL!	#NULL!	#NULL!	#NULL!
09wmoqw6w4zlv23fxqmivqkw5g8ulr3s	0	24874751	en	2014/11/24 8:06:19 PM	2014/11/25 1:48:40 PM	New York	Google Chrome	Other		sample-provider=Cint&respondent=315a5b7c-936b-4ace-b3f7-fc36411f427f	http://s.cint.com/Survey/Fingerprint/315a5b7c-936b-4ace-b3f7-fc36411f427f?sq=1		2028.0	[1, 2, 3, 4]	17:42:21	98.15.211.94					1	2005	7	0	#NULL!	#NULL!	#NULL!	#NULL!	#NULL!	#NULL!	#NULL!	0	5	2	2	1	1	3	1	0	0	1	0	0	0	0	#NULL!	2	3
v535wiz1xd60d13vvjwyxygq0ataz7nk	0	24882357	en	2014/11/24 10:31:51 PM	2014/11/24 10:32:50 PM	Wisconsin	Internet Explorer	Other		sample-provider=Cint&respondent=9775ff9b-4e8b-42db-bfd9-d84466e9e629	http://s.cint.com/Survey/Fingerprint/9775ff9b-4e8b-42db-bfd9-d84466e9e629		2006.0	[1, 2, 3]	00:00:58	75.121.155.254					1	2004	1	0	#NULL!	#NULL!	#NULL!	#NULL!	#NULL!	#NULL!	#NULL!	0	#NULL!	#NULL!	#NULL!	#NULL!	#NULL!	#NULL!	#NULL!	#NULL!	#NULL!	#NULL!	#NULL!	#NULL!	#NULL!	#NULL!	#NULL!	#NULL!	#NULL!
ffgk94sqwjk2zlsktusgwtlikw31l3hp	0	24884031	en	2014/11/24 11:30:08 PM	2014/11/24 11:30:34 PM	Alaska	Internet Explorer	Other		sample-provider=Cint&respondent=caaf29c7-3bd6-46a5-bd60-759b71494594	http://s.cint.com/Survey/Fingerprint/caaf29c7-3bd6-46a5-bd60-759b71494594?sq=1		2010.0	[1, 2, 3]	00:00:26	24.237.196.192					1	2004	5	0	#NULL!	#NULL!	#NULL!	#NULL!	#NULL!	#NULL!	#NULL!	0	#NULL!	#NULL!	#NULL!	#NULL!	#NULL!	#NULL!	#NULL!	#NULL!	#NULL!	#NULL!	#NULL!	#NULL!	#NULL!	#NULL!	#NULL!	#NULL!	#NULL!
n6001knwciib77os93t95zt0oezuigeh	0	24869355	en	2014/11/24 6:58:18 PM	2014/11/24 6:58:53 PM	Pennsylvania	Internet Explorer	Other		sample-provider=Cint&respondent=0552dcba-6fe2-460a-9550-528076ef288f	http://s.cint.com/Survey/Fingerprint/0552dcba-6fe2-460a-9550-528076ef288f?sq=1		2008.0	[1, 2, 3]	00:00:35	96.233.242.174					0	2005	3	0	#NULL!	#NULL!	#NULL!	#NULL!	#NULL!	#NULL!	#NULL!	0	#NULL!	#NULL!	#NULL!	#NULL!	#NULL!	#NULL!	#NULL!	#NULL!	#NULL!	#NULL!	#NULL!	#NULL!	#NULL!	#NULL!	#NULL!	#NULL!	#NULL!
i0kxlzn91pqc7a9zbimvrti7w6u5o55a	0	24817389	en	2014/11/24 8:51:15 AM	2014/11/24 8:53:32 AM	Pennsylvania	Google Chrome	Other		sample-provider=Cint&respondent=87ae7c87-7805-402d-85be-efafa35869ce	http://s.cint.com/Survey/Fingerprint/87ae7c87-7805-402d-85be-efafa35869ce		2022.0	[1, 2, 3, 4, 5]	00:02:17	98.235.255.17					0	2004	8	0	#NULL!	#NULL!	#NULL!	#NULL!	#NULL!	#NULL!	#NULL!	0	3	1	0	0	1	0	1	0	0	0	0	0	0	0	0	2	2
o4rsh5dv7xl4fetdaoadnvxvzdaq7l9p	0	24875607	en	2014/11/24 8:24:42 PM	2014/11/24 8:26:58 PM	Florida	Internet Explorer	Other		sample-provider=Cint&respondent=3ae23255-3089-42e9-ac4f-43cb3643ea67	http://s.cint.com/Survey/Fingerprint/3ae23255-3089-42e9-ac4f-43cb3643ea67?sq=1		2022.0	[1, 2, 3, 4]	00:02:16	66.176.84.150					1	2007	9	0	#NULL!	#NULL!	#NULL!	#NULL!	#NULL!	#NULL!	#NULL!	1	0	0	0	0	1	3	0	#NULL!	#NULL!	#NULL!	#NULL!	#NULL!	#NULL!	#NULL!	#NULL!	#NULL!	#NULL!
69ofcmathewta3fw708v970cffnhw8wu	0	24826645	en	2014/11/24 10:16:40 AM	2014/11/24 10:17:19 AM	Kentucky	Google Chrome	Other		sample-provider=Cint&respondent=fbc185a2-be6f-4e45-9927-52d8f9bae28b	http://s.cint.com/Survey/Fingerprint/fbc185a2-be6f-4e45-9927-52d8f9bae28b		2020.0	[1, 2, 3, 4]	00:00:39	69.176.25.193					1	2007	12	0	#NULL!	#NULL!	#NULL!	#NULL!	#NULL!	#NULL!	#NULL!	0	0	0	0	0	0	0	0	#NULL!	#NULL!	#NULL!	#NULL!	#NULL!	#NULL!	#NULL!	#NULL!	#NULL!	#NULL!
tyki4u6rifthizqy174xyfvmyqkvo1w8	0	24882883	en	2014/11/24 10:46:31 PM	2014/11/24 10:46:53 PM	Ohio	Firefox	Other		sample-provider=Cint&respondent=7fea6fbe-5906-4e1a-8893-431e781c5243	http://s.cint.com/Survey/Fingerprint/7fea6fbe-5906-4e1a-8893-431e781c5243		2014.0	[1, 2, 3]	00:00:21	107.9.140.221					1	2006	7	0	#NULL!	#NULL!	#NULL!	#NULL!	#NULL!	#NULL!	#NULL!	0	#NULL!	#NULL!	#NULL!	#NULL!	#NULL!	#NULL!	#NULL!	#NULL!	#NULL!	#NULL!	#NULL!	#NULL!	#NULL!	#NULL!	#NULL!	#NULL!	#NULL!
e1o5h7k4mf9sm3mp3pssq8biwgscat6o	0	24853007	en	2014/11/24 2:41:46 PM	2014/11/24 2:42:05 PM	United States	Firefox	Other		sample-provider=Cint&respondent=db803b36-3aad-409e-a099-4a765f8c7c71	http://s.cint.com/Survey/Fingerprint/db803b36-3aad-409e-a099-4a765f8c7c71?sq=1		2014.0	[1, 2, 3]	00:00:19	104.52.138.154					1	2006	7	0	#NULL!	#NULL!	#NULL!	#NULL!	#NULL!	#NULL!	#NULL!	0	#NULL!	#NULL!	#NULL!	#NULL!	#NULL!	#NULL!	#NULL!	#NULL!	#NULL!	#NULL!	#NULL!	#NULL!	#NULL!	#NULL!	#NULL!	#NULL!	#NULL!
xqnvauyw0dg6wbxv3sw6ba4hjcurevzp	0	24883329	en	2014/11/24 11:03:43 PM	2014/11/24 11:04:57 PM	Illinois	Firefox	Other		sample-provider=Cint&respondent=eba01a3e-c379-489c-acf5-fc8abe6dad4e	http://s.cint.com/Survey/Fingerprint/eba01a3e-c379-489c-acf5-fc8abe6dad4e?sq=1		2015.0	[1, 2, 3]	00:01:14	50.44.35.98					0	2007	8	0	#NULL!	#NULL!	#NULL!	#NULL!	#NULL!	#NULL!	#NULL!	0	#NULL!	#NULL!	#NULL!	#NULL!	#NULL!	#NULL!	#NULL!	#NULL!	#NULL!	#NULL!	#NULL!	#NULL!	#NULL!	#NULL!	#NULL!	#NULL!	#NULL!
sk9tgetfue751dg8govczvv3ds243gxa	0	24866351	en	2014/11/24 5:52:08 PM	2014/11/24 5:52:36 PM	Massachusetts	Safari	iPad		sample-provider=Cint&respondent=b8b6a05c-e63d-43c5-8ff3-e4ea6d6a2297	http://s.cint.com/Survey/Fingerprint/b8b6a05c-e63d-43c5-8ff3-e4ea6d6a2297?sq=1		2015.0	[1, 2, 3]	00:00:28	76.118.202.14					0	2007	8	0	#NULL!	#NULL!	#NULL!	#NULL!	#NULL!	#NULL!	#NULL!	0	#NULL!	#NULL!	#NULL!	#NULL!	#NULL!	#NULL!	#NULL!	#NULL!	#NULL!	#NULL!	#NULL!	#NULL!	#NULL!	#NULL!	#NULL!	#NULL!	#NULL!
fqazczjq89m2kloeqo56tnoysh1l71hh	0	24831441	en	2014/11/24 11:02:36 AM	2014/11/24 11:03:29 AM	Maryland	Google Chrome	Android		sample-provider=Cint&respondent=fbc9313f-accd-4ad1-b97d-dac762f5d7cf	http://s.cint.com/Survey/Fingerprint/fbc9313f-accd-4ad1-b97d-dac762f5d7cf		2012.0	[1, 2, 3]	00:00:53	24.235.80.162					0	2006	6	0	#NULL!	#NULL!	#NULL!	#NULL!	#NULL!	#NULL!	#NULL!	0	#NULL!	#NULL!	#NULL!	#NULL!	#NULL!	#NULL!	#NULL!	#NULL!	#NULL!	#NULL!	#NULL!	#NULL!	#NULL!	#NULL!	#NULL!	#NULL!	#NULL!
h6gr9z8hzm168hq4xukm6lbgaxyrjw3v	0	24863049	en	2014/11/24 4:51:49 PM	2014/11/24 4:55:25 PM		Internet Explorer	Other		sample-provider=Cint&respondent=c9327d1d-4251-4a7e-84b2-4bd8d841ba1a	http://s.cint.com/Survey/Fingerprint/c9327d1d-4251-4a7e-84b2-4bd8d841ba1a		2037.0	[1, 2, 3, 4, 5, 6]	00:03:36	10.45.1.26					0	2004	10	0	#NULL!	#NULL!	#NULL!	#NULL!	#NULL!	#NULL!	#NULL!	1	4	0	0	0	1	0	1	0	0	0	0	1	0	0	0	0	3
u4rwx4i25nkc4k8n3rnk3u87n54c2r7q	1	24835053	en	2014/11/24 11:38:56 AM	2014/11/24 11:48:47 AM	Illinois	Google Chrome	Other		sample-provider=Cint&respondent=b86dd3ea-6c1d-4c6a-b9fa-67da7e6df64d	http://s.cint.com/Survey/Fingerprint/b86dd3ea-6c1d-4c6a-b9fa-67da7e6df64d?sq=1		2147.0	[1, 2, 3, 4, 5, 6, 7, 8, 9]	00:09:51	69.175.85.2					0	2005	7	0	#NULL!	#NULL!	#NULL!	#NULL!	#NULL!	#NULL!	#NULL!	0	5	2	3	1	5	3	2	0	0	0	0	3	0	0	0	2	0
exdu5o78c6e1khnu24kd7u3fou4hq9l0	1	24862117	en	2014/11/24 4:39:04 PM	2014/11/24 4:42:53 PM	United States	Google Chrome	Other		sample-provider=Cint&respondent=14d8c568-4820-448f-b466-ba850538fb6e	http://s.cint.com/Survey/Fingerprint/14d8c568-4820-448f-b466-ba850538fb6e?sq=1		2226.0	[1, 2, 3, 4, 5, 6, 7, 8, 9]	00:03:48	12.219.200.20					0	2006	4	#NULL!	1	#NULL!	#NULL!	#NULL!	#NULL!	#NULL!	#NULL!	0	5	5	5	5	5	5	5	5	5	5	5	5	5	5	5	5	5
97r1t6gzeb0299cvuta2224g3f68v7m0	1	24843585	en	2014/11/24 12:57:32 PM	2014/11/24 1:02:55 PM	Florida	Safari	iPhone/iPod		sample-provider=Cint&respondent=389642e6-8a7d-4943-8152-c2e5aa990be9	http://s.cint.com/Survey/Fingerprint/389642e6-8a7d-4943-8152-c2e5aa990be9?sq=1		2169.0	[1, 2, 3, 4, 5, 6, 7, 8, 9]	00:05:23	74.115.233.50					0	2007	4	#NULL!	#NULL!	2	#NULL!	#NULL!	#NULL!	#NULL!	#NULL!	0	3	1	0	0	2	1	1	5	5	1	2	2	5	3	3	2	5
0q7joszuqxglu9ur52cmhqx08kqd7sf4	1	24820173	en	2014/11/24 9:17:42 AM	2014/11/24 9:20:19 AM	New York	Internet Explorer	Other		sample-provider=Cint&respondent=c2ea7fd4-7bf9-421b-9377-73393019a7b5	http://s.cint.com/Survey/Fingerprint/c2ea7fd4-7bf9-421b-9377-73393019a7b5?sq=1		2186.0	[1, 2, 3, 4, 5, 6, 7, 8, 9]	00:02:37	24.46.211.32					0	2003	3	#NULL!	1	#NULL!	#NULL!	4	#NULL!	#NULL!	#NULL!	1	5	4	4	4	4	4	3	4	3	4	4	3	3	2	2	3	4
1wfkoh40vd1xuls14g50zuix1aba2hny	1	24811971	en	2014/11/24 7:10:23 AM	2014/11/24 7:15:30 AM	Florida	Google Chrome	Other		sample-provider=Cint&respondent=8f119b41-3386-4040-a9b1-646a677514fb	http://s.cint.com/Survey/Fingerprint/8f119b41-3386-4040-a9b1-646a677514fb?sq=1		2129.0	[1, 2, 3, 4, 5, 6, 7, 8, 9]	00:04:18	174.48.34.118					0	2006	3	#NULL!	#NULL!	#NULL!	#NULL!	#NULL!	#NULL!	6	#NULL!	0	2	3	3	0	0	0	1	0	0	5	0	0	0	0	0	2	5
1l1tyowjuvcmsml4q0pkavg8ald88faz	1	24836733	en	2014/11/24 11:52:51 AM	2014/11/24 11:56:51 AM	Virginia	Firefox	Other		sample-provider=Cint&respondent=054005e8-bfc6-4e9d-86ef-6d6664063c21	http://s.cint.com/Survey/Fingerprint/054005e8-bfc6-4e9d-86ef-6d6664063c21		2139.0	[1, 2, 3, 4, 5, 6, 7, 8, 9]	00:04:00	24.127.71.229					0	2005	5	0	#NULL!	#NULL!	#NULL!	#NULL!	#NULL!	#NULL!	#NULL!	0	5	2	5	1	2	1	5	1	1	1	2	3	2	0	0	5	5
evgunkk0c9z500w8qzx1xih0vx2yiac4	1	24813657	en	2014/11/24 7:41:02 AM	2014/11/24 7:55:07 AM	Colorado	Firefox	Other		sample-provider=Cint&respondent=8f9f6375-8f0c-4709-b855-6c1718981577	http://s.cint.com/Survey/Fingerprint/8f9f6375-8f0c-4709-b855-6c1718981577?sq=1		2144.0	[1, 2, 3, 4, 5, 6, 7, 8, 9]	00:14:04	71.196.148.189					1	2005	4	0	#NULL!	#NULL!	#NULL!	#NULL!	#NULL!	#NULL!	#NULL!	0	5	3	1	0	3	0	5	5	5	5	5	5	0	0	0	3	2
2yuar8fhg274vxa5gdaruthw7mg32kjz	1	24833161	en	2014/11/24 11:20:16 AM	2014/11/24 11:29:35 AM	California	Internet Explorer	Other		sample-provider=Cint&respondent=c60848b9-b006-4a18-a3a8-8449018a792a	http://s.cint.com/Survey/Fingerprint/c60848b9-b006-4a18-a3a8-8449018a792a?sq=1		2151.0	[1, 2, 3, 4, 5, 6, 7, 8, 9]	00:09:19	208.33.250.10					1	2003	1	0	#NULL!	#NULL!	#NULL!	#NULL!	#NULL!	#NULL!	#NULL!	0	4	3	4	2	2	1	4	1	1	2	2	4	2	0	1	3	5
jxu7tr1uonojoo61epj62yakx86it872	1	24829419	en	2014/11/24 10:44:24 AM	2014/11/24 10:51:26 AM	Texas	Firefox	Other		sample-provider=Cint&respondent=f392dce9-0def-4f68-8585-b3b5d592d574	http://s.cint.com/Survey/Fingerprint/f392dce9-0def-4f68-8585-b3b5d592d574?sq=1		2129.0	[1, 2, 3, 4, 5, 6, 7, 8, 9]	00:07:01	198.37.135.2					1	2005	1	#NULL!	1	2	#NULL!	#NULL!	#NULL!	#NULL!	#NULL!	0	3	3	0	1	2	2	3	0	0	2	2	3	0	2	3	2	4
9qk7d4589gxilnk0piysc4go4b5egxzy	1	24859093	en	2014/11/24 3:57:12 PM	2014/11/24 4:02:51 PM	North Carolina	Firefox	Other		sample-provider=Cint&respondent=7766e5c1-b8ef-4a0f-9e2e-943f279cfb99	http://s.cint.com/Survey/Fingerprint/7766e5c1-b8ef-4a0f-9e2e-943f279cfb99?sq=1		2122.0	[1, 2, 3, 4, 5, 6, 7, 8, 9]	00:05:39	107.223.176.207					1	2004	4	0	#NULL!	#NULL!	#NULL!	#NULL!	#NULL!	#NULL!	#NULL!	0	5	2	0	0	2	1	4	0	0	5	0	0	0	0	0	2	5
qra5ts8ep4h0ta4lrq708jfmsf2qyvht	1	24836639	en	2014/11/24 11:52:09 AM	2014/11/24 11:54:03 AM	Iowa	Firefox	Other		sample-provider=Cint&respondent=f35f2b42-572b-4495-8836-c370c8000eee	http://s.cint.com/Survey/Fingerprint/f35f2b42-572b-4495-8836-c370c8000eee?sq=1		2198.0	[1, 2, 3, 4, 5, 6, 7, 8, 9]	00:01:54	65.131.156.110					0	2003	5	0	#NULL!	#NULL!	#NULL!	#NULL!	#NULL!	#NULL!	#NULL!	1	4	4	5	5	4	4	5	4	5	4	4	5	5	4	4	4	5
x6h7aa5caovuez0b46njrkivkpx410ib	1	24843475	en	2014/11/24 12:56:25 PM	2014/11/24 1:06:10 PM	Alabama	Internet Explorer	Other		sample-provider=Cint&respondent=f54fe8b3-d540-43a4-96fa-f07d8d83f251	http://s.cint.com/Survey/Fingerprint/f54fe8b3-d540-43a4-96fa-f07d8d83f251?sq=1		2153.0	[1, 2, 3, 4, 5, 6, 7, 8, 9]	00:09:43	98.142.57.91					0	2006	1	0	1	#NULL!	#NULL!	#NULL!	#NULL!	#NULL!	#NULL!	0	5	4	0	0	2	0	1	5	5	5	2	2	2	0	0	0	5
xgfot71y6cwjilh8stk95z92lqok8hj1	1	24864825	en	2014/11/24 5:22:19 PM	2014/11/24 5:27:12 PM	Michigan	Internet Explorer	Other		sample-provider=Cint&respondent=e0e96368-04f1-4a62-b939-cf20ae3203ce	http://s.cint.com/Survey/Fingerprint/e0e96368-04f1-4a62-b939-cf20ae3203ce		2119.0	[1, 2, 3, 4, 5, 6, 7, 8, 9]	00:04:53	107.132.164.127					1	2004	11	0	#NULL!	#NULL!	#NULL!	#NULL!	#NULL!	#NULL!	#NULL!	0	5	2	0	0	2	2	0	0	0	0	0	0	0	0	0	0	3
zy0ttvp8kfojxllpntkyil1w4gax2hyy	1	24863589	en	2014/11/24 4:59:34 PM	2014/11/24 5:07:43 PM	Illinois	Google Chrome	Other		sample-provider=Cint&respondent=42b1c0f0-efbc-4e52-b75b-435708dd120b	http://s.cint.com/Survey/Fingerprint/42b1c0f0-efbc-4e52-b75b-435708dd120b?sq=1		2167.0	[1, 2, 3, 4, 5, 6, 7, 8, 9]	00:08:08	199.231.208.117					1	2004	3	0	#NULL!	#NULL!	#NULL!	#NULL!	#NULL!	#NULL!	#NULL!	1	5	2	2	1	4	3	2	5	4	2	2	3	2	2	3	3	5
ykgqbyl0rg1775154wvn2spjklk6vf4x	1	24816747	en	2014/11/24 8:39:28 AM	2014/11/24 8:44:44 AM	United States	Firefox	Other		sample-provider=Cint&respondent=357b5ab0-f93d-4dfe-aedb-6fd86bf59f04	http://s.cint.com/Survey/Fingerprint/357b5ab0-f93d-4dfe-aedb-6fd86bf59f04?sq=1		2199.0	[1, 2, 3, 4, 5, 6, 7, 8, 9]	00:05:16	173.31.139.159					0	2006	1	0	#NULL!	#NULL!	#NULL!	#NULL!	#NULL!	#NULL!	#NULL!	2	3	4	4	3	4	4	4	3	4	4	4	4	4	4	4	4	5
3yd7gxm93dt4kfqs2ghwuywf12jc713m	1	24866995	en	2014/11/24 6:05:41 PM	2014/11/24 6:14:37 PM	New York	Google Chrome	Other		sample-provider=Cint&respondent=8e67e679-a923-4a6e-937a-9ecc74c63413	http://s.cint.com/Survey/Fingerprint/8e67e679-a923-4a6e-937a-9ecc74c63413		2135.0	[1, 2, 3, 4, 5, 6, 7, 8, 9]	00:08:56	67.246.187.146					0	2005	6	0	#NULL!	#NULL!	#NULL!	#NULL!	#NULL!	#NULL!	#NULL!	0	5	1	1	0	2	3	3	5	5	0	0	0	0	0	0	3	3
l74f8z3dsoi456pv6wfwq4vjr290m9cv	1	24811499	en	2014/11/24 7:02:57 AM	2014/11/24 7:08:35 AM	United States	Google Chrome	Other		sample-provider=Cint&respondent=a9fb0a34-49f1-44bb-b162-368abb1ca038	http://s.cint.com/Survey/Fingerprint/a9fb0a34-49f1-44bb-b162-368abb1ca038		2164.0	[1, 2, 3, 4, 5, 6, 7, 8, 9]	00:05:38	172.191.14.32					0	2005	2	0	#NULL!	#NULL!	#NULL!	#NULL!	#NULL!	#NULL!	#NULL!	0	3	3	2	3	3	4	3	4	4	3	3	2	3	4	3	2	4
lde2tdrubw9ovgh2ml4usual78z6koab	1	24822739	en	2014/11/24 9:45:40 AM	2014/11/24 9:50:22 AM	Florida	Internet Explorer	Other		sample-provider=Cint&respondent=2dba8be7-73a8-4f70-93d4-41eae2eb5cdf	http://s.cint.com/Survey/Fingerprint/2dba8be7-73a8-4f70-93d4-41eae2eb5cdf		2167.0	[1, 2, 3, 4, 5, 6, 7, 8, 9]	00:04:41	97.100.63.112					0	2007	10	0	#NULL!	#NULL!	#NULL!	#NULL!	#NULL!	#NULL!	#NULL!	0	3	3	4	2	3	2	2	3	2	2	4	2	3	1	1	2	3
6ozhbws9orkoryen1ayyvkjn92fp9n1e	1	24850657	en	2014/11/24 2:13:38 PM	2014/11/24 2:17:55 PM	Pennsylvania	Google Chrome	Other		sample-provider=Cint&respondent=6bb4935e-7f2f-4412-bcbd-f599a800d344	http://s.cint.com/Survey/Fingerprint/6bb4935e-7f2f-4412-bcbd-f599a800d344?sq=1		2129.0	[1, 2, 3, 4, 5, 6, 7, 8, 9]	00:04:16	173.161.253.178					0	2003	4	0	#NULL!	#NULL!	#NULL!	#NULL!	#NULL!	#NULL!	#NULL!	0	1	1	0	1	1	2	2	0	0	1	0	1	0	0	0	3	2
14vf67ejn6iegxz5vpmaidskeolmwd7e	1	24809345	en	2014/11/24 6:34:55 AM	2014/11/24 6:39:44 AM	Maryland	Other	iPad		sample-provider=Cint&respondent=dd78e654-4bd6-472d-b7c2-8817c2e24993	http://s.cint.com/Survey/Fingerprint/dd78e654-4bd6-472d-b7c2-8817c2e24993		2106.0	[1, 2, 3, 4, 5, 6, 7, 8, 9]	00:04:49	96.244.99.91					0	2004	1	#NULL!	1	#NULL!	#NULL!	#NULL!	#NULL!	#NULL!	#NULL!	0	2	0	0	0	0	3	1	0	0	0	0	0	0	0	0	0	3
th6mngil5b9httchgu927ku2q1me3l6u	1	24859531	en	2014/11/24 4:03:05 PM	2014/11/24 4:13:11 PM	Colorado	Opera	Other		sample-provider=Cint&respondent=2df2f662-21e3-4d4e-a38d-315fb0d94d31	http://s.cint.com/Survey/Fingerprint/2df2f662-21e3-4d4e-a38d-315fb0d94d31?sq=1		2133.0	[1, 2, 3, 4, 5, 6, 7, 8, 9]	00:10:06	67.161.152.93					0	2005	5	0	1	#NULL!	#NULL!	#NULL!	#NULL!	#NULL!	#NULL!	0	4	3	3	2	3	2	2	0	0	3	2	2	1	0	1	2	4
wzmqdsw7hmhytqx3dsaot37ztjvh0ua3	1	24845477	en	2014/11/24 1:21:29 PM	2014/11/24 1:28:25 PM	New Jersey	Internet Explorer	Other		sample-provider=Cint&respondent=7f01d7fc-5997-42d0-8933-e74099f9ac0f	http://s.cint.com/Survey/Fingerprint/7f01d7fc-5997-42d0-8933-e74099f9ac0f?sq=1		2138.0	[1, 2, 3, 4, 5, 6, 7, 8, 9]	00:06:56	68.83.48.226					0	2007	6	0	#NULL!	#NULL!	#NULL!	#NULL!	#NULL!	#NULL!	#NULL!	0	3	3	3	0	2	2	2	0	0	3	2	2	0	0	0	2	5
kf5wldu3sbrri49oqhltavbt0mrwiwub	1	24883821	en	2014/11/24 11:21:32 PM	2014/11/24 11:30:20 PM	United States	Firefox	Other		sample-provider=Cint&respondent=8d8115e5-2521-4a84-b649-213a68d8628b	http://s.cint.com/Survey/Fingerprint/8d8115e5-2521-4a84-b649-213a68d8628b		2115.0	[1, 2, 3, 4, 5, 6, 7, 8, 9]	00:08:47	73.164.160.85					0	2007	1	0	1	#NULL!	#NULL!	#NULL!	#NULL!	#NULL!	#NULL!	0	3	3	1	1	2	2	2	0	0	3	0	1	0	0	0	2	2
8vziske64y2rp8vf9wkxujwe67iep5r2	1	24843905	en	2014/11/24 1:01:40 PM	2014/11/24 1:12:50 PM	Michigan	Google Chrome	Other		sample-provider=Cint&respondent=7064ef01-c1dc-4fc0-a9cc-154ff1e1f8d0	http://s.cint.com/Survey/Fingerprint/7064ef01-c1dc-4fc0-a9cc-154ff1e1f8d0?sq=1		2147.0	[1, 2, 3, 4, 5, 6, 7, 8, 9]	00:11:10	108.95.29.86					0	2003	6	#NULL!	#NULL!	2	#NULL!	#NULL!	#NULL!	#NULL!	#NULL!	0	0	0	3	3	2	4	2	4	4	0	0	3	3	2	2	2	5
35sx0c3116ie9ldrdsqad7vzhg5lm3ck	1	24827599	en	2014/11/24 10:26:20 AM	2014/11/24 10:34:18 AM	United States	Google Chrome	Other		sample-provider=Cint&respondent=b25969c2-2d9e-4116-86f8-a79c76c3a79c	http://s.cint.com/Survey/Fingerprint/b25969c2-2d9e-4116-86f8-a79c76c3a79c?sq=1		2132.0	[1, 2, 3, 4, 5, 6, 7, 8, 9]	00:07:58	172.162.20.244					0	2005	5	0	#NULL!	#NULL!	#NULL!	#NULL!	#NULL!	#NULL!	#NULL!	0	5	2	2	1	3	4	1	2	0	2	2	1	1	1	1	2	2
tvr51gbgb2yeohfg1m97l5bh9472c4hy	1	24829635	en	2014/11/24 10:46:57 AM	2014/11/24 10:52:45 AM	United States	Google Chrome	Other		sample-provider=Cint&respondent=0c98547d-2a16-4318-b2fb-6303bcfe9e5b	http://s.cint.com/Survey/Fingerprint/0c98547d-2a16-4318-b2fb-6303bcfe9e5b		2132.0	[1, 2, 3, 4, 5, 6, 7, 8, 9]	00:05:46	172.191.19.215					0	2005	5	0	#NULL!	#NULL!	#NULL!	#NULL!	#NULL!	#NULL!	#NULL!	0	5	2	0	0	2	2	2	2	2	2	2	2	0	0	0	2	2
n52cmvwd05zdsoo71riuy1o28kks3fbw	1	24859247	en	2014/11/24 3:59:35 PM	2014/11/24 4:19:45 PM	California	Google Chrome	Other		sample-provider=Cint&respondent=b62de567-db65-40b2-a823-c74fecfd26d0	http://s.cint.com/Survey/Fingerprint/b62de567-db65-40b2-a823-c74fecfd26d0		2134.0	[1, 2, 3, 4, 5, 6, 7, 8, 9]	00:20:09	68.8.8.102					0	2005	9	0	#NULL!	#NULL!	#NULL!	#NULL!	#NULL!	#NULL!	#NULL!	0	2	2	1	1	2	1	2	4	4	3	2	2	1	1	0	2	5
hk3brvaifx1trfx0vuyb263lalgarl98	1	24812951	en	2014/11/24 7:26:33 AM	2014/11/24 7:38:41 AM	Georgia	Google Chrome	Other		sample-provider=Cint&respondent=be7a7f41-027d-48ac-957a-e3de61d8689e	http://s.cint.com/Survey/Fingerprint/be7a7f41-027d-48ac-957a-e3de61d8689e?sq=1		2113.0	[1, 2, 3, 4, 5, 6, 7, 8, 9]	00:12:08	76.17.40.241					1	2003	1	0	#NULL!	#NULL!	#NULL!	#NULL!	#NULL!	#NULL!	#NULL!	0	2	2	2	0	2	2	0	0	0	2	0	2	0	0	0	0	3
q7oddqfkvly2rvxop7gs885o6s28bt4i	1	24882479	en	2014/11/24 10:32:56 PM	2014/11/24 10:38:08 PM	Pennsylvania	Safari	Other		sample-provider=Cint&respondent=07425c73-c0ae-40c7-a71b-5a0a6a096ffb	http://s.cint.com/Survey/Fingerprint/07425c73-c0ae-40c7-a71b-5a0a6a096ffb?sq=1		2116.0	[1, 2, 3, 4, 5, 6, 7, 8, 9]	00:05:12	76.120.169.203					1	2007	6	0	#NULL!	#NULL!	#NULL!	#NULL!	#NULL!	#NULL!	#NULL!	0	2	1	2	0	1	1	1	2	0	1	1	1	0	1	1	2	2
71cezvrylksl43sxdwe9cq89opn0ymn8	1	24821811	en	2014/11/24 9:36:04 AM	2014/11/24 9:41:28 AM	Maryland	Google Chrome	Other		sample-provider=Cint&respondent=cc3dd82e-fb9e-4559-a440-3f2d432d4d41	http://s.cint.com/Survey/Fingerprint/cc3dd82e-fb9e-4559-a440-3f2d432d4d41?sq=1		2108.0	[1, 2, 3, 4, 5, 6, 7, 8, 9]	00:05:24	65.111.73.50					0	2005	8	0	#NULL!	#NULL!	#NULL!	#NULL!	#NULL!	#NULL!	#NULL!	0	2	2	1	1	1	3	1	0	0	1	0	0	0	0	0	2	2
ikiouem8uxuv6yu34nxgtjnp5l7skyjm	1	24830471	en	2014/11/24 10:54:02 AM	2014/11/24 11:01:41 AM	United States	Safari	iPhone/iPod		sample-provider=Cint&respondent=0192ba3f-4722-4b4a-b177-2d50b9945485	http://s.cint.com/Survey/Fingerprint/0192ba3f-4722-4b4a-b177-2d50b9945485		2121.0	[1, 2, 3, 4, 5, 6, 7, 8, 9]	00:07:39	68.202.94.106					1	2003	10	#NULL!	1	#NULL!	#NULL!	#NULL!	#NULL!	#NULL!	#NULL!	0	0	0	1	0	2	1	1	5	5	3	0	3	1	1	0	0	5
z83hxrtnind5kq1o8pq64hyv3ye1wgun	1	24830335	en	2014/11/24 10:52:59 AM	2014/11/24 10:57:14 AM	United States	Internet Explorer	Other		sample-provider=Cint&respondent=49deef54-60bb-4426-8770-b722ce2d0691	http://s.cint.com/Survey/Fingerprint/49deef54-60bb-4426-8770-b722ce2d0691		2096.0	[1, 2, 3, 4, 5, 6, 7, 8, 9]	00:04:15	24.217.221.150					1	2003	6	0	#NULL!	#NULL!	#NULL!	#NULL!	#NULL!	#NULL!	#NULL!	0	0	0	0	0	1	0	0	3	3	0	0	1	0	1	0	0	4
fyy4vl08j8er0qzhw9h6nrmdjwuitsux	1	24826371	en	2014/11/24 10:13:46 AM	2014/11/24 10:17:54 AM	United States	Google Chrome	Other		sample-provider=Cint&respondent=eb41a668-5b8e-4ee9-87cd-8610da965889	http://s.cint.com/Survey/Fingerprint/eb41a668-5b8e-4ee9-87cd-8610da965889		2115.0	[1, 2, 3, 4, 5, 6, 7, 8, 9]	00:04:08	198.140.7.254					0	2003	3	0	#NULL!	#NULL!	#NULL!	#NULL!	#NULL!	#NULL!	#NULL!	0	2	1	2	1	1	1	1	0	2	2	0	1	0	0	0	0	5
l8zylxnqcp6hhcvb1npjic9vn6xkrswa	1	24869003	en	2014/11/24 6:49:50 PM	2014/11/24 6:56:16 PM	Virginia	Internet Explorer	Other		sample-provider=Cint&respondent=605c82ba-8baa-4700-a456-963788feafff	http://s.cint.com/Survey/Fingerprint/605c82ba-8baa-4700-a456-963788feafff?sq=1		2112.0	[1, 2, 3, 4, 5, 6, 7, 8, 9]	00:06:25	70.160.167.83					1	2003	9	0	#NULL!	#NULL!	#NULL!	#NULL!	#NULL!	#NULL!	#NULL!	0	1	0	1	0	0	3	0	0	0	0	0	0	0	0	0	4	5
kolmeu83rtipozvenyjvq6mg8bwl59dj	1	24864695	en	2014/11/24 5:19:38 PM	2014/11/24 5:23:45 PM	Washington	Internet Explorer	Other		sample-provider=Cint&respondent=e3342e23-7f07-4164-a217-6c76143a667b	http://s.cint.com/Survey/Fingerprint/e3342e23-7f07-4164-a217-6c76143a667b?sq=1		2081.0	[1, 2, 3, 4, 5, 6, 7, 8, 9]	00:04:07	98.203.128.93					1	2005	1	0	#NULL!	#NULL!	#NULL!	#NULL!	#NULL!	#NULL!	#NULL!	0	1	0	0	0	0	0	2	0	0	0	0	0	0	0	0	0	2
j5q82a25lrvfwndm98mhczq3yb8p8daf	1	24812197	en	2014/11/24 7:13:50 AM	2014/11/24 7:17:01 AM	New York	Google Chrome	Other		sample-provider=Cint&respondent=ca998d9e-93f6-419c-bb3d-580f4255d9ad	http://s.cint.com/Survey/Fingerprint/ca998d9e-93f6-419c-bb3d-580f4255d9ad?sq=1		2212.0	[1, 2, 3, 4, 5, 6, 7, 8, 9]	00:03:10	107.170.253.201					0	2003	9	0	#NULL!	#NULL!	#NULL!	#NULL!	#NULL!	#NULL!	#NULL!	1	5	4	4	5	4	5	5	5	5	4	4	5	5	4	4	3	5
2wcqgi80lx0aueoz9rxccf5h2r5ias6d	1	24869861	en	2014/11/24 7:10:10 PM	2014/11/24 7:16:09 PM	California	Google Chrome	Other		sample-provider=Cint&respondent=b52eafdb-450b-4f52-a86e-7170f619f56e	http://s.cint.com/Survey/Fingerprint/b52eafdb-450b-4f52-a86e-7170f619f56e?sq=1		2209.0	[1, 2, 3, 4, 5, 6, 7, 8, 9]	00:05:59	96.41.22.76					0	2007	2	0	#NULL!	#NULL!	#NULL!	#NULL!	#NULL!	#NULL!	#NULL!	0	5	5	5	5	5	5	5	5	5	5	5	5	5	5	5	5	1
pfqszczhn9f2wukvlcwl7bg1fr0lfybf	1	24879763	en	2014/11/24 9:28:16 PM	2014/11/24 10:40:42 PM	United States	Safari	Android		sample-provider=Cint&respondent=a1e52ddc-1328-4f06-abf0-a4ea5af37cae	http://s.cint.com/Survey/Fingerprint/a1e52ddc-1328-4f06-abf0-a4ea5af37cae?sq=1		2159.0	[1, 2, 3, 4, 5, 6, 7, 8, 9]	01:12:26	216.4.56.176					1	2003	3	0	#NULL!	#NULL!	#NULL!	#NULL!	#NULL!	#NULL!	#NULL!	0	4	4	4	4	2	2	2	3	3	3	3	3	2	2	2	5	5
yyrvbjf8ack5nhyrtoyp3rim4i5381b3	1	24817481	en	2014/11/24 8:53:04 AM	2014/11/24 8:57:17 AM	Ohio	Google Chrome	Other		sample-provider=Cint&respondent=4ddf0fbb-814a-41ef-ac8c-f609c163df07	http://s.cint.com/Survey/Fingerprint/4ddf0fbb-814a-41ef-ac8c-f609c163df07		2225.0	[1, 2, 3, 4, 5, 6, 7, 8, 9]	00:04:13	75.186.43.164					0	2007	12	#NULL!	#NULL!	#NULL!	#NULL!	4	#NULL!	#NULL!	#NULL!	1	5	4	4	3	3	4	5	5	4	4	3	4	5	4	4	4	4
boha086zait4pb3hm8e2z2vto96ab3pz	1	24883239	en	2014/11/24 11:00:37 PM	2014/11/24 11:04:09 PM	Wisconsin	Firefox	Other		sample-provider=Cint&respondent=aba12da9-5e15-4a6a-a28e-a377950ef087	http://s.cint.com/Survey/Fingerprint/aba12da9-5e15-4a6a-a28e-a377950ef087?sq=1		2104.0	[1, 2, 3, 4, 5, 6, 7, 8, 9]	00:03:32	107.203.12.248					0	2004	3	#NULL!	1	#NULL!	#NULL!	#NULL!	#NULL!	#NULL!	#NULL!	0	5	5	4	2	0	0	1	0	0	5	0	0	0	0	0	0	0
xcis620lgh40299gtdd34ddbz6i4sohw	1	24836519	en	2014/11/24 11:51:07 AM	2014/11/24 12:00:45 PM	Virginia	Internet Explorer	Other		sample-provider=Cint&respondent=f7537b38-d458-4336-bf6f-8834f624c486	http://s.cint.com/Survey/Fingerprint/f7537b38-d458-4336-bf6f-8834f624c486?sq=1		2164.0	[1, 2, 3, 4, 5, 6, 7, 8, 9]	00:09:38	71.62.3.215					0	2007	12	0	#NULL!	#NULL!	#NULL!	#NULL!	#NULL!	#NULL!	#NULL!	1	5	2	0	0	5	5	3	0	0	5	1	5	5	0	0	0	3
4036lcz9y2fj4ua7zufrblns3g49vmuw	1	24848117	en	2014/11/24 1:47:10 PM	2014/11/24 1:52:25 PM	Texas	Internet Explorer	Other		sample-provider=Cint&respondent=72ac454a-e798-41be-b51c-1b3c74218a30	http://s.cint.com/Survey/Fingerprint/72ac454a-e798-41be-b51c-1b3c74218a30?sq=1		2132.0	[1, 2, 3, 4, 5, 6, 7, 8, 9]	00:05:14	99.33.56.170					0	2005	1	0	#NULL!	#NULL!	#NULL!	#NULL!	#NULL!	#NULL!	#NULL!	0	5	3	2	3	1	5	1	1	1	2	2	2	1	0	0	3	2
cz787ee2zg2yv8j05he0hxpzofsvufg6	1	24886809	en	2014/11/25 12:10:35 AM	2014/11/25 12:17:33 AM	United States	Google Chrome	Android		sample-provider=Cint&respondent=4a9f39ad-705b-4512-96c9-06abad72cada	http://s.cint.com/Survey/Fingerprint/4a9f39ad-705b-4512-96c9-06abad72cada?sq=1		2136.0	[1, 2, 3, 4, 5, 6, 7, 8, 9]	00:06:58	216.4.56.159					0	2006	9	#NULL!	1	#NULL!	#NULL!	#NULL!	#NULL!	#NULL!	#NULL!	0	3	2	0	0	2	0	2	3	3	2	0	0	0	0	0	2	5
4uqys2bznd4tafu872hflnlpdo9zcbx0	1	24835867	en	2014/11/24 11:45:47 AM	2014/11/24 11:52:58 AM	United States	Firefox	Other		sample-provider=Cint&respondent=33e31814-6ddc-4b2a-8318-f673217b4bbe	http://s.cint.com/Survey/Fingerprint/33e31814-6ddc-4b2a-8318-f673217b4bbe?sq=1		2168.0	[1, 2, 3, 4, 5, 6, 7, 8, 9]	00:07:08	172.162.23.40					0	2007	4	0	#NULL!	#NULL!	#NULL!	#NULL!	#NULL!	#NULL!	#NULL!	1	2	3	2	2	3	3	2	3	2	3	2	2	3	3	2	2	2
qri5547h8b6pa2ap0kmo53id3rng08iy	1	24850989	en	2014/11/24 2:18:25 PM	2014/11/24 2:28:25 PM	United States	Google Chrome	Other		sample-provider=Cint&respondent=7628a767-0791-4316-bf4e-22c7c2385890	http://s.cint.com/Survey/Fingerprint/7628a767-0791-4316-bf4e-22c7c2385890?sq=1		2140.0	[1, 2, 3, 4, 5, 6, 7, 8, 9]	00:09:59	209.220.67.172					1	2007	11	0	#NULL!	#NULL!	#NULL!	#NULL!	#NULL!	#NULL!	#NULL!	0	3	2	0	1	3	5	2	5	5	2	1	2	3	2	1	2	3
s1jo5tg3k6fcdlazbs07isk7zi4zg8z0	1	24814739	en	2014/11/24 8:02:46 AM	2014/11/24 8:10:18 AM	Georgia	Google Chrome	Other		sample-provider=Cint&respondent=28364a33-0be4-469b-83fc-522c5297791a	http://s.cint.com/Survey/Fingerprint/28364a33-0be4-469b-83fc-522c5297791a		2116.0	[1, 2, 3, 4, 5, 6, 7, 8, 9]	00:07:32	50.150.36.228					1	2003	1	#NULL!	#NULL!	2	#NULL!	#NULL!	#NULL!	#NULL!	#NULL!	0	3	2	0	0	1	3	2	0	0	2	0	2	0	0	0	0	4
0b9nebwojz2po1dgq97ghinsaiha2zsf	1	24822071	en	2014/11/24 9:38:56 AM	2014/11/24 9:47:49 AM	New Jersey	Google Chrome	Other		sample-provider=Cint&respondent=132a45be-7169-4f1e-a4ba-6b5f29581a62	http://s.cint.com/Survey/Fingerprint/132a45be-7169-4f1e-a4ba-6b5f29581a62?sq=1		2088.0	[1, 2, 3, 4, 5, 6, 7, 8, 9]	00:08:52	69.248.92.78					1	2004	1	#NULL!	1	#NULL!	#NULL!	#NULL!	#NULL!	#NULL!	#NULL!	0	3	1	0	0	0	0	2	0	0	2	0	0	0	0	0	2	2
jol039mpgqwfz82nubi5hvqxkn9i68je	1	24847957	en	2014/11/24 1:45:38 PM	2014/11/24 1:54:42 PM	District of Columbia	Google Chrome	Other		sample-provider=Cint&respondent=f9378d46-8ce4-41ac-bbcf-c55a4a480c3b	http://s.cint.com/Survey/Fingerprint/f9378d46-8ce4-41ac-bbcf-c55a4a480c3b		2106.0	[1, 2, 3, 4, 5, 6, 7, 8, 9]	00:09:04	108.18.47.137					1	2003	9	0	#NULL!	2	#NULL!	#NULL!	#NULL!	#NULL!	#NULL!	1	3	0	0	0	2	1	1	0	0	0	0	2	1	0	0	0	2
h0rov7sizvro59z3qhwdtxqowunqi4em	1	24827137	en	2014/11/24 10:21:27 AM	2014/11/24 10:37:26 AM	Oklahoma	Firefox	Other		sample-provider=Cint&respondent=8070cc7f-d9f1-4459-a6dd-8c5f94010c18	http://s.cint.com/Survey/Fingerprint/8070cc7f-d9f1-4459-a6dd-8c5f94010c18?sq=1		2207.0	[1, 2, 3, 4, 5, 6, 7, 8, 9]	00:15:59	68.0.71.177					0	2006	4	#NULL!	1	#NULL!	#NULL!	#NULL!	#NULL!	#NULL!	#NULL!	1	4	5	4	4	5	4	4	4	5	4	5	5	4	5	4	2	2
nqj9sf5l7hi3u0s68pgh09m3guys5fvp	1	24826957	en	2014/11/24 10:20:02 AM	2014/11/24 10:24:02 AM	North Carolina	Firefox	Other		sample-provider=Cint&respondent=2b971af1-8aba-438e-b7cc-13a2962899f2	http://s.cint.com/Survey/Fingerprint/2b971af1-8aba-438e-b7cc-13a2962899f2?sq=1		2208.0	[1, 2, 3, 4, 5, 6, 7, 8, 9]	00:04:00	75.176.115.61					0	2006	1	0	#NULL!	#NULL!	#NULL!	#NULL!	#NULL!	#NULL!	#NULL!	2	4	4	4	4	4	4	3	5	4	4	4	4	4	4	4	4	5
f7uc5xl0kunlwltzmbvu4e4m713ua0p6	1	24852009	en	2014/11/24 2:31:28 PM	2014/11/24 2:42:53 PM	California	Internet Explorer	Other		sample-provider=Cint&respondent=afd52837-04e8-49c6-8431-19e934fc333c	http://s.cint.com/Survey/Fingerprint/afd52837-04e8-49c6-8431-19e934fc333c?sq=1		2119.0	[1, 2, 3, 4, 5, 6, 7, 8, 9]	00:11:24	70.231.227.119					1	2004	1	0	#NULL!	#NULL!	#NULL!	#NULL!	#NULL!	#NULL!	#NULL!	0	5	1	1	0	2	1	1	1	5	5	1	2	1	0	2	2	3
jf26nn702yfc4pm9xolqzzsmxncqrl7j	1	24879379	en	2014/11/24 9:22:03 PM	2014/11/24 9:27:34 PM	United States	Google Chrome	Other		sample-provider=Cint&respondent=f2b98546-1728-4e62-84c9-e5b93ba0c29e	http://s.cint.com/Survey/Fingerprint/f2b98546-1728-4e62-84c9-e5b93ba0c29e?sq=1		2150.0	[1, 2, 3, 4, 5, 6, 7, 8, 9]	00:05:30	73.40.222.6					1	2006	10	0	#NULL!	#NULL!	#NULL!	#NULL!	#NULL!	#NULL!	#NULL!	1	5	3	0	0	4	5	4	0	0	4	0	3	3	2	0	2	1
zm1wv9lyaz44iorz2u5m03k7a4lwz4j6	1	24881271	en	2014/11/24 9:57:07 PM	2014/11/24 10:15:15 PM	New York	Google Chrome	Other		sample-provider=Cint&respondent=b3ab369e-a002-4325-a42f-ad561c283d6f	http://s.cint.com/Survey/Fingerprint/b3ab369e-a002-4325-a42f-ad561c283d6f?sq=1		2152.0	[1, 2, 3, 4, 5, 6, 7, 8, 9]	00:18:07	67.221.255.97					0	2004	12	0	#NULL!	#NULL!	#NULL!	#NULL!	#NULL!	#NULL!	#NULL!	0	3	2	3	2	2	4	2	4	4	2	3	3	2	2	2	3	2
7l1ujpzuct88m1vdq6ytxn8716gdpt35	1	24859005	en	2014/11/24 3:55:27 PM	2014/11/24 4:05:43 PM	Illinois	Google Chrome	Other		sample-provider=Cint&respondent=2d16f908-ed38-46e2-b92a-53d88714269e	http://s.cint.com/Survey/Fingerprint/2d16f908-ed38-46e2-b92a-53d88714269e?sq=1		2120.0	[1, 2, 3, 4, 5, 6, 7, 8, 9]	00:10:16	65.216.71.72					1	2006	1	0	#NULL!	#NULL!	#NULL!	#NULL!	#NULL!	#NULL!	#NULL!	0	5	1	5	1	2	2	2	0	0	1	0	3	0	0	3	0	4
fcrhe68baobvp07wod94yy1k0modccse	1	24811929	en	2014/11/24 7:09:10 AM	2014/11/24 7:12:53 AM	Maryland	Firefox	Other		sample-provider=Cint&respondent=b7267ace-8b39-48bb-a3e2-95b2a1301bbb	http://s.cint.com/Survey/Fingerprint/b7267ace-8b39-48bb-a3e2-95b2a1301bbb		2186.0	[1, 2, 3, 4, 5, 6, 7, 8, 9]	00:03:43	173.79.14.15					0	2003	3	0	#NULL!	#NULL!	#NULL!	#NULL!	#NULL!	#NULL!	#NULL!	1	4	4	5	4	3	4	4	4	3	4	5	4	3	4	5	3	5
zbnyfgejify7xjhielh7gbi5svof4kmb	1	24859151	en	2014/11/24 3:58:00 PM	2014/11/24 4:03:12 PM	Illinois	Firefox	Other		sample-provider=Cint&respondent=b8522862-bc4c-421c-8cf6-8a800512049e	http://s.cint.com/Survey/Fingerprint/b8522862-bc4c-421c-8cf6-8a800512049e?sq=1		2118.0	[1, 2, 3, 4, 5, 6, 7, 8, 9]	00:05:11	184.156.1.170					1	2006	9	0	#NULL!	#NULL!	#NULL!	#NULL!	#NULL!	#NULL!	#NULL!	0	3	1	0	0	3	0	4	0	0	0	0	0	0	0	0	2	4
2yax8gfqotxfre175hre2mb486dq5uwf	1	24861489	en	2014/11/24 4:29:47 PM	2014/11/24 4:39:22 PM	Illinois	Internet Explorer	Other		sample-provider=Cint&respondent=f2b66a1c-f0f7-44a8-99f7-6c866fd5d5fc	http://s.cint.com/Survey/Fingerprint/f2b66a1c-f0f7-44a8-99f7-6c866fd5d5fc		2201.0	[1, 2, 3, 4, 5, 6, 7, 8, 9]	00:09:35	12.168.46.92					0	2005	6	0	#NULL!	#NULL!	#NULL!	#NULL!	#NULL!	#NULL!	#NULL!	0	4	5	4	5	5	4	4	4	4	4	4	4	4	4	4	3	3
gdgy515cx1lnrayr534oyev34yaoprwd	1	24830141	en	2014/11/24 10:51:20 AM	2014/11/24 11:32:18 AM	Michigan	Internet Explorer	Other		sample-provider=Cint&respondent=7cfd72a1-1f5d-4680-9d3f-2c0a9d42137b	http://s.cint.com/Survey/Fingerprint/7cfd72a1-1f5d-4680-9d3f-2c0a9d42137b		2107.0	[1, 2, 3, 4, 5, 6, 7, 8, 9]	00:40:58	66.211.74.113					0	2004	7	0	#NULL!	#NULL!	#NULL!	#NULL!	#NULL!	#NULL!	#NULL!	0	3	3	0	0	0	0	3	0	0	0	0	0	0	0	0	2	5
1dvy32lge9qjl1bn465ms22de34oqev4	1	24881509	en	2014/11/24 10:05:12 PM	2014/11/24 10:07:48 PM	New York	Firefox	Other		sample-provider=Cint&respondent=0b1740ad-600d-4e70-b630-d76541fde998	http://s.cint.com/Survey/Fingerprint/0b1740ad-600d-4e70-b630-d76541fde998?sq=1		2211.0	[1, 2, 3, 4, 5, 6, 7, 8, 9]	00:02:35	192.225.166.50					0	2006	6	0	#NULL!	#NULL!	#NULL!	#NULL!	#NULL!	#NULL!	#NULL!	1	5	4	5	3	4	5	4	5	4	5	3	5	4	3	5	4	5
5yqiargy41hy3puewc7icybahyw3zbmn	1	24884207	en	2014/11/24 11:38:40 PM	2014/11/24 11:57:02 PM	United States	Google Chrome	Android		sample-provider=Cint&respondent=d7dc71bd-bc26-4c87-b29d-ec2cbf065636	http://s.cint.com/Survey/Fingerprint/d7dc71bd-bc26-4c87-b29d-ec2cbf065636?sq=1		2121.0	[1, 2, 3, 4, 5, 6, 7, 8, 9]	00:18:21	174.23.91.189					0	2003	2	#NULL!	1	2	#NULL!	#NULL!	#NULL!	#NULL!	#NULL!	0	5	5	2	2	0	2	0	5	5	5	0	0	0	0	0	0	4
e5sf6itojdbvc2zhzgmay84o645gx2mi	1	24860893	en	2014/11/24 4:20:28 PM	2014/11/24 4:27:26 PM	Minnesota	Firefox	Other		sample-provider=Cint&respondent=793ebcb0-6c16-4081-8b40-30ff6dd45afb	http://s.cint.com/Survey/Fingerprint/793ebcb0-6c16-4081-8b40-30ff6dd45afb?sq=1		2119.0	[1, 2, 3, 4, 5, 6, 7, 8, 9]	00:06:56	76.77.192.91					0	2006	3	0	#NULL!	#NULL!	#NULL!	#NULL!	#NULL!	#NULL!	#NULL!	0	4	3	0	0	2	0	2	0	0	2	0	2	2	0	0	0	5
fromblzrhqqorpb5j2ngjxa2ngbtxeh4	1	24834487	en	2014/11/24 11:33:26 AM	2014/11/24 11:36:07 AM	Iowa	Firefox	Other		sample-provider=Cint&respondent=da2e1bb2-b70a-49ee-b03c-edd92736738e	http://s.cint.com/Survey/Fingerprint/da2e1bb2-b70a-49ee-b03c-edd92736738e?sq=1		2194.0	[1, 2, 3, 4, 5, 6, 7, 8, 9]	00:02:41	72.50.229.1					0	2004	3	0	#NULL!	#NULL!	#NULL!	#NULL!	#NULL!	#NULL!	#NULL!	1	4	4	5	5	4	4	5	3	4	4	5	5	4	3	3	4	5
6n8rv04u6u2baz5h5bslsom5wjpio4qm	1	24863119	en	2014/11/24 4:52:37 PM	2014/11/24 4:55:44 PM	Illinois	Firefox	Other		sample-provider=Cint&respondent=e07b8249-5b87-440e-83c8-3597b0bb41d9	http://s.cint.com/Survey/Fingerprint/e07b8249-5b87-440e-83c8-3597b0bb41d9?sq=1		2130.0	[1, 2, 3, 4, 5, 6, 7, 8, 9]	00:03:07	50.179.2.111					0	2004	2	0	#NULL!	#NULL!	#NULL!	#NULL!	#NULL!	#NULL!	#NULL!	0	2	2	2	0	2	0	2	0	0	3	0	0	0	0	0	2	5
8kxanxwz9ho1bmxfda8lnbbo5pqwdkix	1	24870457	en	2014/11/24 7:24:03 PM	2014/11/24 7:29:14 PM	New Jersey	Google Chrome	Other		sample-provider=Cint&respondent=49ea4262-4572-4f0e-bc8f-a1e9ffd00c92	http://s.cint.com/Survey/Fingerprint/49ea4262-4572-4f0e-bc8f-a1e9ffd00c92?sq=1		2117.0	[1, 2, 3, 4, 5, 6, 7, 8, 9]	00:05:11	74.102.171.27					1	2007	10	0	#NULL!	#NULL!	#NULL!	#NULL!	#NULL!	#NULL!	#NULL!	0	3	2	3	1	1	0	1	0	0	3	0	0	0	0	0	0	2
y6237oq1il9iquuj7gn5r8hugoo5s4ny	1	24814887	en	2014/11/24 8:05:14 AM	2014/11/24 8:10:35 AM	Pennsylvania	Internet Explorer	Other		sample-provider=Cint&respondent=590625e1-6312-408d-b21d-ab1cf7ed3401	http://s.cint.com/Survey/Fingerprint/590625e1-6312-408d-b21d-ab1cf7ed3401?sq=1		2125.0	[1, 2, 3, 4, 5, 6, 7, 8, 9]	00:05:20	75.97.55.235					1	2005	4	0	#NULL!	#NULL!	#NULL!	#NULL!	#NULL!	#NULL!	#NULL!	0	4	1	2	0	2	0	3	0	0	0	0	0	2	0	0	4	3
f7drdotv9upt76jm3l6t3ef2aqolqxc4	1	24834669	en	2014/11/24 11:35:15 AM	2014/11/24 11:40:41 AM	Nevada	Internet Explorer	Other		sample-provider=Cint&respondent=90b01bc9-4cd7-4944-b18f-bf80680fdf30	http://s.cint.com/Survey/Fingerprint/90b01bc9-4cd7-4944-b18f-bf80680fdf30?sq=1		2102.0	[1, 2, 3, 4, 5, 6, 7, 8, 9]	00:05:25	50.107.23.184					0	2004	3	0	#NULL!	#NULL!	#NULL!	#NULL!	#NULL!	#NULL!	#NULL!	0	3	2	0	0	1	0	1	0	0	2	0	0	0	0	0	0	0
1ew4zyhrpcnlmd9yphlgqgbmkzzegh9x	1	24875931	en	2014/11/24 8:31:42 PM	2014/11/24 8:42:52 PM	New York	Safari	Android		sample-provider=Cint&respondent=43d21111-c8c4-43e1-919f-9cd8a43f8297	http://s.cint.com/Survey/Fingerprint/43d21111-c8c4-43e1-919f-9cd8a43f8297?sq=1		2156.0	[1, 2, 3, 4, 5, 6, 7, 8, 9]	00:11:10	74.88.226.81					0	2005	11	#NULL!	#NULL!	2	#NULL!	#NULL!	#NULL!	#NULL!	#NULL!	0	2	2	2	2	3	2	2	4	4	3	2	2	3	2	2	2	3
efyepduoop8jnjecatvd7nwxht4avhyc	1	24830637	en	2014/11/24 10:55:31 AM	2014/11/24 10:59:21 AM	California	Firefox	Other		sample-provider=Cint&respondent=adc91bfb-4307-4ce3-a38a-28232cdb7856	http://s.cint.com/Survey/Fingerprint/adc91bfb-4307-4ce3-a38a-28232cdb7856?sq=1		2153.0	[1, 2, 3, 4, 5, 6, 7, 8, 9]	00:03:50	108.247.157.139					0	2006	8	#NULL!	1	#NULL!	#NULL!	#NULL!	#NULL!	#NULL!	#NULL!	0	5	2	0	0	2	4	2	0	0	2	2	2	0	0	0	4	5
i1bys3bq8u7eu9ulj8vp7buunpc3isrg	1	24810739	en	2014/11/24 6:52:26 AM	2014/11/24 7:00:05 AM	Texas	Google Chrome	Android		sample-provider=Cint&respondent=e31b38d7-007f-480c-824b-8a7a4f146352	http://s.cint.com/Survey/Fingerprint/e31b38d7-007f-480c-824b-8a7a4f146352		2117.0	[1, 2, 3, 4, 5, 6, 7, 8, 9]	00:07:38	66.87.99.90					1	2004	5	#NULL!	1	#NULL!	#NULL!	#NULL!	#NULL!	#NULL!	#NULL!	0	2	0	0	0	2	1	2	0	0	0	1	1	1	2	1	0	5
ap4z6g8chozt1c8gaq7x5ip0t3xgtl1l	1	24864251	en	2014/11/24 5:10:47 PM	2014/11/24 5:14:55 PM	Ohio	Google Chrome	Other		sample-provider=Cint&respondent=89920795-c506-40b7-95a2-2e4202a68efc	http://s.cint.com/Survey/Fingerprint/89920795-c506-40b7-95a2-2e4202a68efc?sq=1		2157.0	[1, 2, 3, 4, 5, 6, 7, 8, 9]	00:04:08	24.210.136.46					0	2003	11	0	#NULL!	#NULL!	#NULL!	#NULL!	#NULL!	#NULL!	#NULL!	0	3	3	3	3	3	3	4	2	3	3	2	2	3	3	2	3	5
oopqbk2fcphg15nittuphq2omt1pmua5	1	24841711	en	2014/11/24 12:36:46 PM	2014/11/24 12:52:51 PM	Arizona	Internet Explorer	Other		sample-provider=Cint&respondent=fe088af1-bff9-4fbb-93e7-fa1e19cce42b	http://s.cint.com/Survey/Fingerprint/fe088af1-bff9-4fbb-93e7-fa1e19cce42b?sq=1		2140.0	[1, 2, 3, 4, 5, 6, 7, 8, 9]	00:16:04	184.98.110.222					0	2004	6	#NULL!	#NULL!	2	#NULL!	#NULL!	#NULL!	#NULL!	#NULL!	0	3	2	2	2	2	1	2	3	2	2	1	2	2	1	2	2	2
asv14zffqkl70scjxcediolsjikduget	1	24859453	en	2014/11/24 4:02:14 PM	2014/11/24 4:11:24 PM	Massachusetts	Safari	Android		sample-provider=Cint&respondent=c5a23b5f-9f70-4f1a-a3fa-43289f089cc6	http://s.cint.com/Survey/Fingerprint/c5a23b5f-9f70-4f1a-a3fa-43289f089cc6		2125.0	[1, 2, 3, 4, 5, 6, 7, 8, 9]	00:09:10	24.63.199.32					1	2005	6	0	#NULL!	#NULL!	#NULL!	#NULL!	#NULL!	#NULL!	#NULL!	0	2	2	0	0	1	4	1	5	5	1	1	1	1	1	1	0	3
tj5c9uw8v9ohoxycb227mo4b9yn47xt9	1	24869161	en	2014/11/24 6:53:42 PM	2014/11/24 6:56:27 PM	Pennsylvania	Google Chrome	Android		sample-provider=Cint&respondent=714dfd4d-fe8d-49ed-a997-e3dec1cffcae	http://s.cint.com/Survey/Fingerprint/714dfd4d-fe8d-49ed-a997-e3dec1cffcae?sq=1		2161.0	[1, 2, 3, 4, 5, 6, 7, 8, 9]	00:02:45	71.60.238.209					0	2004	3	0	#NULL!	#NULL!	#NULL!	#NULL!	#NULL!	#NULL!	#NULL!	0	3	3	2	2	3	4	3	3	1	3	3	2	4	3	3	1	1
gv5ub55ajn9ol2rql2blvmm7vuwo69h8	1	24821875	en	2014/11/24 9:36:42 AM	2014/11/24 9:40:39 AM	Pennsylvania	Internet Explorer	Other		sample-provider=Cint&respondent=7becdc26-243a-4590-b9dd-2460f6bb8e89	http://s.cint.com/Survey/Fingerprint/7becdc26-243a-4590-b9dd-2460f6bb8e89?sq=1		2126.0	[1, 2, 3, 4, 5, 6, 7, 8, 9]	00:03:57	71.181.180.48					0	2006	5	0	#NULL!	#NULL!	#NULL!	#NULL!	#NULL!	#NULL!	#NULL!	2	4	2	2	0	2	0	3	0	0	2	3	3	2	0	1	3	5
e6efezsardeg4n8f29a943vwy0hk46mf	1	24850125	en	2014/11/24 2:06:51 PM	2014/11/24 2:17:55 PM	Delaware	Google Chrome	Other		sample-provider=Cint&respondent=9069bb4b-5ecf-48ae-b653-412764e320e3	http://s.cint.com/Survey/Fingerprint/9069bb4b-5ecf-48ae-b653-412764e320e3?sq=1		2118.0	[1, 2, 3, 4, 5, 6, 7, 8, 9]	00:11:02	108.59.10.153					0	2003	4	0	#NULL!	#NULL!	#NULL!	#NULL!	#NULL!	#NULL!	#NULL!	0	3	2	1	0	2	0	3	3	0	1	3	3	2	2	0	2	4
3pja1nqf87j4mfiothxjkpl708dowxxq	1	24860161	en	2014/11/24 4:11:47 PM	2014/11/24 4:15:57 PM	Oklahoma	Internet Explorer	Other		sample-provider=Cint&respondent=8ade18c7-b627-4628-b5f5-9cbb1e85468a	http://s.cint.com/Survey/Fingerprint/8ade18c7-b627-4628-b5f5-9cbb1e85468a?sq=1		2097.0	[1, 2, 3, 4, 5, 6, 7, 8, 9]	00:04:10	216.14.155.169					0	2004	10	0	#NULL!	#NULL!	#NULL!	#NULL!	#NULL!	#NULL!	#NULL!	0	2	1	0	0	1	0	2	0	0	0	0	0	0	0	0	2	4
oebm8qkvksu1yrdbbvhj7403rqjijvfs	1	24838731	en	2014/11/24 12:10:12 PM	2014/11/24 12:12:59 PM	California	Google Chrome	Other		sample-provider=Cint&respondent=47c518c2-a6f8-4ed2-a82b-bb0f55582bed	http://s.cint.com/Survey/Fingerprint/47c518c2-a6f8-4ed2-a82b-bb0f55582bed?sq=1		2131.0	[1, 2, 3, 4, 5, 6, 7, 8, 9]	00:02:46	76.88.95.115					0	2006	4	0	#NULL!	#NULL!	#NULL!	#NULL!	#NULL!	#NULL!	#NULL!	1	3	2	3	1	2	2	2	2	2	1	1	2	1	1	1	2	4
6m1q84vfqo750pl6yj30zvt46h9lqmw6	1	24861425	en	2014/11/24 4:28:45 PM	2014/11/24 4:36:03 PM	Washington	Internet Explorer	Other		sample-provider=Cint&respondent=6382d84b-f23a-46fe-b0e3-605c9f689d60	http://s.cint.com/Survey/Fingerprint/6382d84b-f23a-46fe-b0e3-605c9f689d60?sq=1		2120.0	[1, 2, 3, 4, 5, 6, 7, 8, 9]	00:06:50	63.237.228.238					0	2004	9	0	#NULL!	#NULL!	#NULL!	#NULL!	#NULL!	#NULL!	#NULL!	0	3	0	1	0	2	1	2	0	0	0	0	0	0	0	0	1	4
lc241opcionwd64aljayx500dc4cyrjd	1	24822937	en	2014/11/24 9:48:08 AM	2014/11/24 9:57:18 AM	California	Google Chrome	Other		sample-provider=Cint&respondent=6c2caa64-63a7-4244-bce9-d9de1b8e7d33	http://s.cint.com/Survey/Fingerprint/6c2caa64-63a7-4244-bce9-d9de1b8e7d33?sq=1		2126.0	[1, 2, 3, 4, 5, 6, 7, 8, 9]	00:09:09	71.165.177.142					0	2007	12	#NULL!	1	#NULL!	#NULL!	#NULL!	#NULL!	#NULL!	#NULL!	0	3	2	2	1	1	4	2	0	0	0	0	2	1	1	0	2	2
n34kqfbq3gh1ffa9qy3l6xbe8llmv02w	1	24853289	en	2014/11/24 2:44:44 PM	2014/11/24 3:02:14 PM	Florida	Google Chrome	Other		sample-provider=Cint&respondent=ef4e1959-4616-40bc-961a-a28db50d95da	http://s.cint.com/Survey/Fingerprint/ef4e1959-4616-40bc-961a-a28db50d95da?sq=1		2099.0	[1, 2, 3, 4, 5, 6, 7, 8, 9]	00:17:28	98.174.45.29					0	2004	10	0	#NULL!	#NULL!	#NULL!	#NULL!	#NULL!	#NULL!	#NULL!	0	2	1	0	0	1	0	1	0	0	2	0	0	0	0	0	0	2
bt2cy5h1hfxnbvejzcz1mf7z2d9fp8mk	1	24866477	en	2014/11/24 5:54:22 PM	2014/11/24 6:00:13 PM	Wisconsin	Google Chrome	Other		sample-provider=Cint&respondent=ffae3550-8bc3-45e2-b10f-e3794531fd7a	http://s.cint.com/Survey/Fingerprint/ffae3550-8bc3-45e2-b10f-e3794531fd7a?sq=1		2114.0	[1, 2, 3, 4, 5, 6, 7, 8, 9]	00:05:50	162.226.238.88					0	2003	4	#NULL!	#NULL!	2	#NULL!	#NULL!	#NULL!	#NULL!	#NULL!	0	2	2	3	1	1	1	2	0	0	3	0	0	1	0	0	2	2
7525snx7d5fj98qo7erxkbdf6xs5agx4	1	24867697	en	2014/11/24 6:21:25 PM	2014/11/24 6:25:24 PM	United States	Safari	iPhone/iPod		sample-provider=Cint&respondent=d392f10c-04a4-4650-b8ea-5d9d8f00ee9f	http://s.cint.com/Survey/Fingerprint/d392f10c-04a4-4650-b8ea-5d9d8f00ee9f?sq=1		2144.0	[1, 2, 3, 4, 5, 6, 7, 8, 9]	00:03:58	76.91.82.35					0	2003	11	#NULL!	1	#NULL!	#NULL!	4	#NULL!	#NULL!	#NULL!	0	2	2	2	2	3	2	2	3	3	3	3	2	2	2	2	1	1
eys229l6fee65jp10rrk3rkaehw9ostj	1	24852093	en	2014/11/24 2:32:01 PM	2014/11/24 2:35:04 PM	Indiana	Google Chrome	Other		sample-provider=Cint&respondent=147fb810-a007-4459-9f95-7441671108e1	http://s.cint.com/Survey/Fingerprint/147fb810-a007-4459-9f95-7441671108e1?sq=1		2116.0	[1, 2, 3, 4, 5, 6, 7, 8, 9]	00:03:02	207.67.84.130					1	2005	9	0	#NULL!	#NULL!	#NULL!	#NULL!	#NULL!	#NULL!	#NULL!	0	3	1	0	0	3	4	3	0	0	1	1	3	2	2	2	2	2
l4dg1pae3thlrfd6yj48czocp5gmeqa9	1	24879963	en	2014/11/24 9:31:23 PM	2014/11/24 9:37:36 PM	Ohio	Internet Explorer	Other		sample-provider=Cint&respondent=c18c8680-2566-422d-8b3c-04b128ad2b3e	http://s.cint.com/Survey/Fingerprint/c18c8680-2566-422d-8b3c-04b128ad2b3e		2111.0	[1, 2, 3, 4, 5, 6, 7, 8, 9]	00:06:13	76.188.184.59					0	2003	10	0	#NULL!	#NULL!	#NULL!	#NULL!	#NULL!	#NULL!	#NULL!	0	2	2	2	2	0	0	1	0	0	2	1	1	0	0	0	2	4
so3jv9q37kzx3y64ixzex7qtn4ulmy1z	1	24859725	en	2014/11/24 4:05:35 PM	2014/11/24 4:12:09 PM	Ohio	Google Chrome	Other		sample-provider=Cint&respondent=7937ff89-d275-455d-a8de-1c7f424da619	http://s.cint.com/Survey/Fingerprint/7937ff89-d275-455d-a8de-1c7f424da619?sq=1		2146.0	[1, 2, 3, 4, 5, 6, 7, 8, 9]	00:06:33	216.185.38.88					0	2005	3	#NULL!	1	#NULL!	#NULL!	#NULL!	#NULL!	#NULL!	#NULL!	0	3	2	2	1	3	1	3	4	4	2	2	2	2	3	2	3	3
ytgg28lwzrw45d0q5gijappo2upici2m	1	24831805	en	2014/11/24 11:06:23 AM	2014/11/24 11:13:10 AM	United States	Google Chrome	Other		sample-provider=Cint&respondent=181a9c63-4b35-4259-9ff4-8d4780231c73	http://s.cint.com/Survey/Fingerprint/181a9c63-4b35-4259-9ff4-8d4780231c73		2110.0	[1, 2, 3, 4, 5, 6, 7, 8, 9]	00:06:47	184.176.85.117					1	2003	7	0	#NULL!	#NULL!	#NULL!	#NULL!	#NULL!	#NULL!	#NULL!	0	1	0	1	0	1	0	0	0	0	0	0	0	0	0	0	0	2
gv7nipq76tph6zlhe1j1gfdmwok7xy0z	1	24849699	en	2014/11/24 2:01:35 PM	2014/11/24 2:10:18 PM	New York	Internet Explorer	Other		sample-provider=Cint&respondent=3da29f8e-5807-43b8-aa28-2cfdb3b337d0	http://s.cint.com/Survey/Fingerprint/3da29f8e-5807-43b8-aa28-2cfdb3b337d0?sq=1		2149.0	[1, 2, 3, 4, 5, 6, 7, 8, 9]	00:08:40	108.14.107.13					0	2005	11	0	#NULL!	#NULL!	#NULL!	#NULL!	#NULL!	#NULL!	#NULL!	0	2	2	1	0	1	2	1	1	2	2	2	2	1	2	1	2	3
3fn01idkuao05zah5e22jbiedapk43vy	1	24817601	en	2014/11/24 8:54:42 AM	2014/11/24 9:00:32 AM	Texas	Google Chrome	Other		sample-provider=Cint&respondent=d8c2e7c9-8991-496f-be63-51ece7064696	http://s.cint.com/Survey/Fingerprint/d8c2e7c9-8991-496f-be63-51ece7064696?sq=1		2125.0	[1, 2, 3, 4, 5, 6, 7, 8, 9]	00:05:49	99.153.74.188					0	2006	11	#NULL!	1	#NULL!	#NULL!	#NULL!	#NULL!	#NULL!	#NULL!	0	3	2	3	1	2	2	2	2	2	0	0	2	0	0	1	1	3
y9mj8yi4j3byjj8enauz2o77lty6sryh	1	24888951	en	2014/11/25 1:53:46 AM	2014/11/25 2:08:31 AM	Nevada	Google Chrome	Other		sample-provider=Cint&respondent=554462b3-5166-4544-adc4-3e49197969b2	http://s.cint.com/Survey/Fingerprint/554462b3-5166-4544-adc4-3e49197969b2		2081.0	[1, 2, 3, 4, 5, 6, 7, 8, 9]	00:14:45	68.108.165.68					0	2005	1	#NULL!	#NULL!	#NULL!	#NULL!	4	#NULL!	#NULL!	#NULL!	0	2	0	0	0	1	1	0	0	0	1	0	1	0	0	0	1	1
t6cjnllsxalu0m2n4qqasrvwpslzqpiz	1	24846655	en	2014/11/24 1:30:33 PM	2014/11/24 1:34:17 PM	California	Google Chrome	Other		sample-provider=Cint&respondent=5730dcbf-9d1a-499e-aa02-f91ddf128ad7	http://s.cint.com/Survey/Fingerprint/5730dcbf-9d1a-499e-aa02-f91ddf128ad7?sq=1		2080.0	[1, 2, 3, 4, 5, 6, 7, 8, 9]	00:03:43	168.215.211.130					0	2003	1	0	#NULL!	#NULL!	#NULL!	#NULL!	#NULL!	#NULL!	#NULL!	0	1	0	0	0	0	0	1	0	0	0	0	0	0	0	0	3	5
zyh3byy43i7bxefbf1izueqxkvw5dfpd	1	24842803	en	2014/11/24 12:49:36 PM	2014/11/24 12:57:27 PM	United States	Firefox	Other		sample-provider=Cint&respondent=9a432aca-40a2-496c-940f-4dd1de72e7c4	http://s.cint.com/Survey/Fingerprint/9a432aca-40a2-496c-940f-4dd1de72e7c4		2086.0	[1, 2, 3, 4, 5, 6, 7, 8, 9]	00:07:50	71.11.157.100					0	2005	4	0	#NULL!	#NULL!	#NULL!	#NULL!	#NULL!	#NULL!	#NULL!	0	3	2	0	0	1	0	2	0	0	2	0	0	0	0	0	0	5
fie042clke1eevjn89ppfkfqyb7itxox	1	24853625	en	2014/11/24 2:49:04 PM	2014/11/24 2:54:09 PM	California	Internet Explorer	Other		sample-provider=Cint&respondent=4c404dbf-f5a6-41be-bdbd-a18504613a4c	http://s.cint.com/Survey/Fingerprint/4c404dbf-f5a6-41be-bdbd-a18504613a4c		2138.0	[1, 2, 3, 4, 5, 6, 7, 8, 9]	00:05:05	64.183.42.38					0	2004	4	0	#NULL!	#NULL!	#NULL!	#NULL!	#NULL!	#NULL!	#NULL!	1	3	4	3	2	2	1	1	0	0	1	0	4	3	4	3	0	0
odsgcvqu8vp62qsxlhnjwmvveg4b8hyd	1	24822345	en	2014/11/24 9:41:30 AM	2014/11/24 10:24:10 AM	Minnesota	Firefox	Other		sample-provider=Cint&respondent=66261b3a-94e3-4609-8dec-0b4fc3d9fc02	http://s.cint.com/Survey/Fingerprint/66261b3a-94e3-4609-8dec-0b4fc3d9fc02?sq=1		2112.0	[1, 2, 3, 4, 5, 6, 7, 8, 9]	00:42:40	50.241.44.69					0	2005	6	0	#NULL!	#NULL!	#NULL!	#NULL!	#NULL!	#NULL!	#NULL!	0	5	1	1	1	1	1	1	0	0	0	0	2	0	0	0	2	2
i29zdyx2ruq7fbjl9ic2oa0smxinqne4	1	24829393	en	2014/11/24 10:44:11 AM	2014/11/24 10:47:18 AM	California	Firefox	Other		sample-provider=Cint&respondent=d8f70d83-366c-4eab-9114-ae59c41401ab	http://s.cint.com/Survey/Fingerprint/d8f70d83-366c-4eab-9114-ae59c41401ab?sq=1		2159.0	[1, 2, 3, 4, 5, 6, 7, 8, 9]	00:03:06	198.148.119.236					0	2005	5	#NULL!	1	#NULL!	#NULL!	#NULL!	#NULL!	#NULL!	#NULL!	2	3	4	4	3	4	3	4	4	4	4	3	3	3	4	3	3	5
v702dhydy8bckkaionxhrnr0labbktpo	1	24863829	en	2014/11/24 5:03:05 PM	2014/11/24 5:20:04 PM	Texas	Firefox	Other		sample-provider=Cint&respondent=6529a57c-9297-4450-b9e4-3563231fcc46	http://s.cint.com/Survey/Fingerprint/6529a57c-9297-4450-b9e4-3563231fcc46?sq=1		2097.0	[1, 2, 3, 4, 5, 6, 7, 8, 9]	00:16:58	108.90.114.236					1	2007	7	0	1	#NULL!	#NULL!	#NULL!	#NULL!	#NULL!	#NULL!	0	3	0	0	0	1	0	1	0	0	0	0	1	0	0	0	0	4
jv0cc20mpinrnak6p7n4yntfyc65wu5v	1	24826303	en	2014/11/24 10:12:47 AM	2014/11/24 10:18:39 AM	Michigan	Safari	iPhone/iPod		sample-provider=Cint&respondent=1af2c1da-250f-44b9-beaf-3565577ee460	http://s.cint.com/Survey/Fingerprint/1af2c1da-250f-44b9-beaf-3565577ee460?sq=1		2110.0	[1, 2, 3, 4, 5, 6, 7, 8, 9]	00:05:49	24.180.162.136					0	2005	12	0	#NULL!	#NULL!	#NULL!	#NULL!	#NULL!	#NULL!	#NULL!	0	3	2	3	0	2	2	2	0	0	0	0	3	0	0	0	0	0
xiuodzcthemp1or92tgvel8wl0ueg24a	1	24841233	en	2014/11/24 12:32:31 PM	2014/11/24 12:38:39 PM	Michigan	Google Chrome	Android		sample-provider=Cint&respondent=f0401446-44bb-4649-afe3-5203f79e11e0	http://s.cint.com/Survey/Fingerprint/f0401446-44bb-4649-afe3-5203f79e11e0?sq=1		2083.0	[1, 2, 3, 4, 5, 6, 7, 8, 9]	00:06:07	66.87.114.154					0	2007	12	0	#NULL!	#NULL!	#NULL!	#NULL!	#NULL!	#NULL!	#NULL!	0	3	2	0	0	2	2	2	0	0	0	0	3	0	0	1	0	0
5dl2en7swydaa4f5w8umo2kzuccqbhbe	1	24867401	en	2014/11/24 6:14:53 PM	2014/11/24 6:19:51 PM	United States	Firefox	Other		sample-provider=Cint&respondent=dd4fab3a-a836-43a8-b299-4381dc6f76f4	http://s.cint.com/Survey/Fingerprint/dd4fab3a-a836-43a8-b299-4381dc6f76f4?sq=1		2104.0	[1, 2, 3, 4, 5, 6, 7, 8, 9]	00:04:58	12.175.90.82					1	2006	5	0	#NULL!	#NULL!	#NULL!	#NULL!	#NULL!	#NULL!	#NULL!	0	2	1	0	0	1	0	1	0	0	0	0	0	0	0	0	4	5
sq3pl9cuu6jvxxzf1lrrewd7sxh7ln7l	1	24870807	en	2014/11/24 7:31:00 PM	2014/11/24 7:38:14 PM	Ohio	Firefox	Other		sample-provider=Cint&respondent=a4de560e-c162-4647-95fe-64f200dbf565	http://s.cint.com/Survey/Fingerprint/a4de560e-c162-4647-95fe-64f200dbf565?sq=1		2105.0	[1, 2, 3, 4, 5, 6, 7, 8, 9]	00:07:14	99.126.220.164					1	2003	8	0	1	#NULL!	#NULL!	#NULL!	#NULL!	6	#NULL!	0	2	2	2	2	0	0	2	0	0	2	0	0	1	0	0	0	2
dwx1ziuhc854atej1ettznyfogxaoe4c	1	24859785	en	2014/11/24 4:06:18 PM	2014/11/24 4:16:14 PM	United States	Google Chrome	Android		sample-provider=Cint&respondent=67877264-095a-43eb-b221-97c1d64137de	http://s.cint.com/Survey/Fingerprint/67877264-095a-43eb-b221-97c1d64137de?sq=1		2140.0	[1, 2, 3, 4, 5, 6, 7, 8, 9]	00:09:56	128.177.161.187					1	2004	12	0	#NULL!	#NULL!	#NULL!	#NULL!	#NULL!	#NULL!	#NULL!	0	2	2	1	0	1	5	2	1	1	4	1	2	2	2	1	2	4
q5wb1ch56p55ohwznlpe1i2dyanwfi6w	1	24869267	en	2014/11/24 6:56:18 PM	2014/11/24 7:00:06 PM	United States	Firefox	Other		sample-provider=Cint&respondent=33ce061e-1b90-4789-ab8e-be0ce5bd4a15	http://s.cint.com/Survey/Fingerprint/33ce061e-1b90-4789-ab8e-be0ce5bd4a15?sq=1		2143.0	[1, 2, 3, 4, 5, 6, 7, 8, 9]	00:03:47	75.161.130.200					0	2004	4	0	#NULL!	#NULL!	#NULL!	#NULL!	#NULL!	#NULL!	#NULL!	0	4	3	2	2	4	5	2	1	2	1	3	5	3	2	1	2	5
cm75526zls6f448xqdd3fjabeum5irxv	1	24811831	en	2014/11/24 7:07:31 AM	2014/11/24 7:13:06 AM	Ohio	Google Chrome	Other		sample-provider=Cint&respondent=e64d23d0-97e8-46cd-bd8a-4677ba2039fa	http://s.cint.com/Survey/Fingerprint/e64d23d0-97e8-46cd-bd8a-4677ba2039fa		2121.0	[1, 2, 3, 4, 5, 6, 7, 8, 9]	00:05:35	209.11.224.42					0	2007	12	0	#NULL!	#NULL!	#NULL!	#NULL!	#NULL!	#NULL!	#NULL!	0	5	2	2	0	2	0	3	0	0	1	0	0	0	0	0	3	2
899zznc5ul369nplh9vodhtfst70rb55	1	24886457	en	2014/11/24 11:52:57 PM	2014/11/24 11:56:52 PM	Pennsylvania	Google Chrome	Other		sample-provider=Cint&respondent=d0dadff0-8a74-493f-a9a1-d476e856bac9	http://s.cint.com/Survey/Fingerprint/d0dadff0-8a74-493f-a9a1-d476e856bac9?sq=1		2119.0	[1, 2, 3, 4, 5, 6, 7, 8, 9]	00:03:54	174.54.34.62					0	2007	2	0	#NULL!	#NULL!	#NULL!	#NULL!	#NULL!	#NULL!	#NULL!	0	3	1	3	1	2	5	0	0	0	2	0	0	0	0	0	3	3
42h9a9i7qazo75f16in5rq6y78de6211	1	24819993	en	2014/11/24 9:14:38 AM	2014/11/24 9:18:57 AM	Florida	Google Chrome	Other		sample-provider=Cint&respondent=b34c80f3-720c-48f5-b2bc-4e326c9227ae	http://s.cint.com/Survey/Fingerprint/b34c80f3-720c-48f5-b2bc-4e326c9227ae?sq=1		2190.0	[1, 2, 3, 4, 5, 6, 7, 8, 9]	00:04:17	64.187.119.205					0	2003	5	0	#NULL!	#NULL!	#NULL!	#NULL!	#NULL!	#NULL!	#NULL!	2	5	4	3	3	4	4	3	5	4	3	3	4	3	2	3	4	3
ybxzbx5y9n7d8g6tm5tx7tvzn7keg9wz	1	24822139	en	2014/11/24 9:39:28 AM	2014/11/24 9:42:50 AM	Maryland	Firefox	Other		sample-provider=Cint&respondent=8f08a6a2-c31a-4359-8707-d60aefe1269f	http://s.cint.com/Survey/Fingerprint/8f08a6a2-c31a-4359-8707-d60aefe1269f?sq=1		2155.0	[1, 2, 3, 4, 5, 6, 7, 8, 9]	00:03:21	23.31.193.29					0	2005	3	0	#NULL!	#NULL!	#NULL!	#NULL!	#NULL!	#NULL!	#NULL!	1	3	2	3	2	3	4	3	3	2	4	3	3	2	3	4	3	2
ai5fpsj5n07767wdaybhzszxsq47unre	1	24832493	en	2014/11/24 11:13:02 AM	2014/11/24 11:18:13 AM	United States	Google Chrome	Other		sample-provider=Cint&respondent=3226803b-9c18-4ba0-b9fd-f86482dc9a89	http://s.cint.com/Survey/Fingerprint/3226803b-9c18-4ba0-b9fd-f86482dc9a89?sq=1		2159.0	[1, 2, 3, 4, 5, 6, 7, 8, 9]	00:05:11	172.191.19.134					0	2005	1	0	#NULL!	#NULL!	#NULL!	#NULL!	#NULL!	#NULL!	#NULL!	1	2	3	4	3	4	2	3	3	2	3	4	4	2	4	3	2	2
dfb9tlmwj4g02wwtvuevl10bkxm1e7vn	1	24855291	en	2014/11/24 3:07:12 PM	2014/11/24 3:11:54 PM	United States	Google Chrome	Other		sample-provider=Cint&respondent=a36d1f1c-7a2d-4bc2-8587-ba73fb01c98f	http://s.cint.com/Survey/Fingerprint/a36d1f1c-7a2d-4bc2-8587-ba73fb01c98f		2159.0	[1, 2, 3, 4, 5, 6, 7, 8, 9]	00:04:41	172.191.45.167					0	2006	1	0	#NULL!	#NULL!	#NULL!	#NULL!	#NULL!	#NULL!	#NULL!	1	4	3	3	3	3	3	3	3	3	3	4	4	4	4	3	2	1
xkrjx114a7ar4pqtxag7ahiubbm2f10g	1	24806399	en	2014/11/24 5:51:15 AM	2014/11/24 5:58:25 AM		Google Chrome	Other		sample-provider=Cint&respondent=dbe5b29b-b6bc-4087-86e8-568d5e21037e	http://s.cint.com/Survey/Fingerprint/dbe5b29b-b6bc-4087-86e8-568d5e21037e		2149.0	[1, 2, 3, 4, 5, 6, 7, 8, 9]	00:07:10	104.222.211.40					0	2007	4	0	#NULL!	#NULL!	#NULL!	#NULL!	#NULL!	#NULL!	#NULL!	0	2	3	2	3	4	3	2	1	2	3	4	5	4	3	3	2	2
y2fmo19j0498d7cf6mfnfahst3vjfwkr	1	24887105	en	2014/11/25 12:22:58 AM	2014/11/25 12:28:41 AM	Florida	Google Chrome	Other		sample-provider=Cint&respondent=77922f77-4eb4-40cc-b48c-5e559cd9dcb0	http://s.cint.com/Survey/Fingerprint/77922f77-4eb4-40cc-b48c-5e559cd9dcb0?sq=1		2166.0	[1, 2, 3, 4, 5, 6, 7, 8, 9]	00:05:43	65.111.165.205					1	2005	8	0	1	#NULL!	#NULL!	#NULL!	#NULL!	#NULL!	#NULL!	0	3	2	2	1	2	3	2	2	3	3	2	2	3	3	2	2	4
wsxtc0ks7oncyonkeq71khdyps5sjj3u	1	24818483	en	2014/11/24 9:05:26 AM	2014/11/24 9:11:33 AM	Kentucky	Google Chrome	Android		sample-provider=Cint&respondent=e22fb597-e4ab-40fd-9049-ad346d8fc37c	http://s.cint.com/Survey/Fingerprint/e22fb597-e4ab-40fd-9049-ad346d8fc37c		2099.0	[1, 2, 3, 4, 5, 6, 7, 8, 9]	00:06:07	166.137.10.96					1	2004	12	0	#NULL!	#NULL!	#NULL!	#NULL!	#NULL!	#NULL!	#NULL!	1	1	0	1	0	0	0	0	0	0	0	0	0	0	0	0	0	2
p7yu1m203c6dpd5u3ieipvmxwzkokmj9	1	24865923	en	2014/11/24 5:43:44 PM	2014/11/24 6:00:36 PM	New Jersey	Internet Explorer	Other		sample-provider=Cint&respondent=6b0d244e-0d37-4cde-a2f3-783ef14df195	http://s.cint.com/Survey/Fingerprint/6b0d244e-0d37-4cde-a2f3-783ef14df195?sq=1		2130.0	[1, 2, 3, 4, 5, 6, 7, 8, 9]	00:16:50	173.63.110.69					0	2005	6	#NULL!	#NULL!	#NULL!	#NULL!	#NULL!	#NULL!	6	#NULL!	1	1	1	0	0	2	3	2	5	5	2	3	3	0	0	0	3	3
otjqykd8cv95pqcj5y5f6xw6w47td8en	1	24861267	en	2014/11/24 4:26:16 PM	2014/11/24 4:37:04 PM	Texas	Other	iPhone/iPod		sample-provider=Cint&respondent=c7659290-eb56-4092-a263-ad7099887ef2	http://s.cint.com/Survey/Fingerprint/c7659290-eb56-4092-a263-ad7099887ef2?sq=1		2094.0	[1, 2, 3, 4, 5, 6, 7, 8, 9]	00:10:48	70.196.74.107					1	2005	1	#NULL!	1	#NULL!	#NULL!	#NULL!	#NULL!	#NULL!	#NULL!	0	3	1	2	0	1	0	3	0	0	0	0	3	0	0	4	0	4
fynpvynlx3pxuzkxcesj4dadg34f17eq	1	24848717	en	2014/11/24 1:52:43 PM	2014/11/24 2:04:04 PM	Texas	Google Chrome	Other		sample-provider=Cint&respondent=9626a863-08dd-47c4-8280-fbac7e4fe8d1	http://s.cint.com/Survey/Fingerprint/9626a863-08dd-47c4-8280-fbac7e4fe8d1?sq=1		2109.0	[1, 2, 3, 4, 5, 6, 7, 8, 9]	00:11:21	70.138.43.232					0	2003	1	#NULL!	#NULL!	2	#NULL!	#NULL!	#NULL!	#NULL!	#NULL!	0	0	1	1	1	2	1	1	1	1	0	1	1	0	0	0	1	3
z47q4qsjnvdk22tn4uh5tpn3anx2lucx	1	24887073	en	2014/11/25 12:22:01 AM	2014/11/25 12:28:48 AM	Florida	Google Chrome	iPhone/iPod		sample-provider=Cint&respondent=508bd5e9-bb0c-4046-99a6-3f7b755225a2	http://s.cint.com/Survey/Fingerprint/508bd5e9-bb0c-4046-99a6-3f7b755225a2?sq=1		2095.0	[1, 2, 3, 4, 5, 6, 7, 8, 9]	00:06:47	65.34.139.109					1	2007	11	#NULL!	1	#NULL!	#NULL!	#NULL!	#NULL!	#NULL!	#NULL!	0	2	1	0	0	1	0	0	0	0	0	0	1	0	0	0	2	3
4gqa2wxdygbrgxggnqemasg7pdtx42is	1	24836723	en	2014/11/24 11:52:46 AM	2014/11/24 12:05:18 PM	Texas	Safari	Android		sample-provider=Cint&respondent=526bc322-029a-4896-9fb7-77b105117a23	http://s.cint.com/Survey/Fingerprint/526bc322-029a-4896-9fb7-77b105117a23?sq=1		2119.0	[1, 2, 3, 4, 5, 6, 7, 8, 9]	00:12:32	70.120.174.5					0	2003	9	#NULL!	1	#NULL!	#NULL!	#NULL!	#NULL!	#NULL!	#NULL!	0	2	3	3	2	2	3	3	3	3	3	2	3	1	0	0	3	0
evhyj7p4kl6wvkpsj6676kzr3ujh02i9	1	24813389	en	2014/11/24 7:35:22 AM	2014/11/24 7:41:45 AM	Mississippi	Google Chrome	Android		sample-provider=Cint&respondent=67104b4a-eca5-496a-8400-6e9e7513d701	http://s.cint.com/Survey/Fingerprint/67104b4a-eca5-496a-8400-6e9e7513d701?sq=1		2085.0	[1, 2, 3, 4, 5, 6, 7, 8, 9]	00:06:22	24.233.248.47					0	2005	4	#NULL!	#NULL!	#NULL!	#NULL!	#NULL!	#NULL!	6	#NULL!	0	3	2	0	0	1	2	2	0	0	1	0	1	0	0	0	1	5
wuvhrdhrhrx0j1r31jqy408o85a66kgl	1	24884199	en	2014/11/24 11:38:10 PM	2014/11/24 11:42:49 PM	Colorado	Google Chrome	Other		sample-provider=Cint&respondent=0ebfc935-08fb-4660-85bf-8c3b6c64be98	http://s.cint.com/Survey/Fingerprint/0ebfc935-08fb-4660-85bf-8c3b6c64be98?sq=1		2084.0	[1, 2, 3, 4, 5, 6, 7, 8, 9]	00:04:37	64.93.124.73					0	2004	3	0	#NULL!	#NULL!	#NULL!	#NULL!	#NULL!	#NULL!	#NULL!	1	2	0	0	0	2	1	1	0	0	0	0	1	0	0	0	0	3
6b0znuzrm66lkei2pkwc09c6buo8le4b	1	24820977	en	2014/11/24 9:27:59 AM	2014/11/24 9:38:34 AM	California	Google Chrome	Android		sample-provider=Cint&respondent=1523e7e2-e3fa-4efa-aecb-e2008b561979	http://s.cint.com/Survey/Fingerprint/1523e7e2-e3fa-4efa-aecb-e2008b561979		2096.0	[1, 2, 3, 4, 5, 6, 7, 8, 9]	00:10:35	71.160.144.14					0	2004	8	0	#NULL!	#NULL!	#NULL!	#NULL!	#NULL!	#NULL!	#NULL!	0	2	1	0	0	1	0	0	0	0	2	0	0	0	0	0	2	2
32e8dx8twj3n1g0igrr1ie022ygn9veo	1	24818689	en	2014/11/24 9:07:17 AM	2014/11/24 9:14:31 AM	Oklahoma	Google Chrome	Other		sample-provider=Cint&respondent=8ff78f37-9872-4204-bc07-3e0167345683	http://s.cint.com/Survey/Fingerprint/8ff78f37-9872-4204-bc07-3e0167345683?sq=1		2122.0	[1, 2, 3, 4, 5, 6, 7, 8, 9]	00:07:13	108.240.57.18					0	2003	7	0	#NULL!	#NULL!	#NULL!	#NULL!	#NULL!	#NULL!	#NULL!	0	3	1	0	0	3	1	0	0	0	0	0	0	0	0	0	0	4
y5hy1h3p08r0qewsphhx9qm6bv0mzjle	1	24875045	en	2014/11/24 8:12:55 PM	2014/11/24 8:20:52 PM	Illinois	Firefox	Other		sample-provider=Cint&respondent=2eeab83e-42b2-4a23-800b-dc8e346f1cb9	http://s.cint.com/Survey/Fingerprint/2eeab83e-42b2-4a23-800b-dc8e346f1cb9?sq=1		2124.0	[1, 2, 3, 4, 5, 6, 7, 8, 9]	00:07:56	98.214.147.177					0	2004	6	0	#NULL!	#NULL!	#NULL!	#NULL!	#NULL!	#NULL!	#NULL!	0	1	4	0	0	1	4	2	0	0	4	0	0	0	0	0	0	5
jw0esvdqyljf6o266ooffg6nrbqpn5wt	1	24838919	en	2014/11/24 12:12:02 PM	2014/11/24 12:13:31 PM	Florida	Google Chrome	Other		sample-provider=Cint&respondent=4fadcdd5-0f47-40f5-b3c1-716a11e214b3	http://s.cint.com/Survey/Fingerprint/4fadcdd5-0f47-40f5-b3c1-716a11e214b3?sq=1		2112.0	[1, 2, 3, 4, 5, 6, 7, 8, 9]	00:01:29	65.34.226.42					0	2005	1	0	1	#NULL!	#NULL!	#NULL!	#NULL!	#NULL!	#NULL!	0	1	3	2	2	2	3	3	1	2	3	2	3	2	3	2	1	1
wp4w1c5t82er32fewni2k0k4ju3ugmex	1	24849407	en	2014/11/24 1:58:45 PM	2014/11/24 2:06:00 PM	California	Firefox	Other		sample-provider=Cint&respondent=2c106489-a778-4813-a433-30900eed10a7	http://s.cint.com/Survey/Fingerprint/2c106489-a778-4813-a433-30900eed10a7?sq=1		2099.0	[1, 2, 3, 4, 5, 6, 7, 8, 9]	00:07:15	68.4.7.137					1	2003	12	0	1	#NULL!	#NULL!	#NULL!	#NULL!	#NULL!	#NULL!	0	2	1	1	0	0	0	0	0	0	0	0	0	0	0	0	0	2
bx869yt9pp87xjiqjfaf4cxmukyn53im	1	24877403	en	2014/11/24 8:54:04 PM	2014/11/24 9:06:12 PM	Michigan	Firefox	Other		sample-provider=Cint&respondent=89b1acdc-9942-433c-a204-af608fd08c4f	http://s.cint.com/Survey/Fingerprint/89b1acdc-9942-433c-a204-af608fd08c4f?sq=1		2100.0	[1, 2, 3, 4, 5, 6, 7, 8, 9]	00:12:07	107.5.131.30					0	2007	4	0	#NULL!	#NULL!	#NULL!	#NULL!	#NULL!	#NULL!	#NULL!	2	4	4	4	4	4	2	2	1	1	1	0	4	1	1	1	0	0
0ssqvxoicyc9msgsfuzpi1d0nwhx6cum	1	24824047	en	2014/11/24 9:51:20 AM	2014/11/24 9:53:25 AM	Pennsylvania	Firefox	Other		sample-provider=Cint&respondent=2749e221-ab9b-4f5d-aaea-9f8a7cc7513f	http://s.cint.com/Survey/Fingerprint/2749e221-ab9b-4f5d-aaea-9f8a7cc7513f?sq=1		2091.0	[1, 2, 3, 4, 5, 6, 7, 8, 9]	00:02:05	108.2.150.64					0	2004	4	0	#NULL!	#NULL!	#NULL!	#NULL!	#NULL!	#NULL!	#NULL!	0	1	1	1	1	1	1	2	1	1	0	0	1	1	1	1	1	2
6iq7lipjsz9h18to3tni1vw6s457a11x	1	24879993	en	2014/11/24 9:32:03 PM	2014/11/24 9:34:22 PM	New Jersey	Firefox	Other		sample-provider=Cint&respondent=3ae68808-0d0f-4ae1-8320-1a3a098d7733	http://s.cint.com/Survey/Fingerprint/3ae68808-0d0f-4ae1-8320-1a3a098d7733?sq=1		2146.0	[1, 2, 3, 4, 5, 6, 7, 8, 9]	00:02:18	68.37.189.249					0	2007	3	#NULL!	1	#NULL!	#NULL!	#NULL!	#NULL!	#NULL!	#NULL!	2	3	4	3	3	4	3	3	3	4	4	4	3	3	3	4	4	4
kbvknkdyodghkssqmmjwi7lc8zv49ygb	1	24874953	en	2014/11/24 8:10:24 PM	2014/11/24 8:15:43 PM	Texas	Google Chrome	Other		sample-provider=Cint&respondent=94aedc03-4daf-4e42-8f65-3b11fe492f27	http://s.cint.com/Survey/Fingerprint/94aedc03-4daf-4e42-8f65-3b11fe492f27?sq=1		2140.0	[1, 2, 3, 4, 5, 6, 7, 8, 9]	00:05:18	24.27.32.84					0	2007	7	0	#NULL!	#NULL!	#NULL!	#NULL!	#NULL!	#NULL!	#NULL!	0	4	4	4	4	4	4	4	3	3	3	3	3	3	3	3	2	2
anpyiis18l48xtclba9b1ocsz22n5zsc	1	24869517	en	2014/11/24 7:02:30 PM	2014/11/24 7:09:56 PM	Oklahoma	Google Chrome	Other		sample-provider=Cint&respondent=9710c483-9ad4-487c-994c-099bd0f2d844	http://s.cint.com/Survey/Fingerprint/9710c483-9ad4-487c-994c-099bd0f2d844?sq=1		2111.0	[1, 2, 3, 4, 5, 6, 7, 8, 9]	00:07:25	66.212.40.111					1	2003	4	0	#NULL!	#NULL!	#NULL!	#NULL!	#NULL!	#NULL!	#NULL!	0	3	3	3	0	2	2	3	0	0	4	2	0	0	0	0	2	5
1nyb6bd2xhncx67z0raev085flkbg9rl	1	24881965	en	2014/11/24 10:21:22 PM	2014/11/24 10:32:09 PM	Florida	Google Chrome	Other		sample-provider=Cint&respondent=0681cdee-3573-4630-8e80-75d158a7cae0	http://s.cint.com/Survey/Fingerprint/0681cdee-3573-4630-8e80-75d158a7cae0?sq=1		2120.0	[1, 2, 3, 4, 5, 6, 7, 8, 9]	00:10:47	198.136.62.199					0	2004	2	0	#NULL!	#NULL!	#NULL!	#NULL!	#NULL!	#NULL!	#NULL!	1	2	3	2	3	2	4	2	2	3	2	1	2	2	3	3	2	1
yw64v9tjtehoksfccecmccq1yrwpq6i1	1	24848735	en	2014/11/24 1:53:00 PM	2014/11/24 1:57:11 PM	California	Firefox	Other		sample-provider=Cint&respondent=ef06f090-578d-438d-9a71-b49222b36564	http://s.cint.com/Survey/Fingerprint/ef06f090-578d-438d-9a71-b49222b36564?sq=1		2114.0	[1, 2, 3, 4, 5, 6, 7, 8, 9]	00:04:11	76.14.164.134					0	2005	5	0	#NULL!	#NULL!	#NULL!	#NULL!	#NULL!	#NULL!	#NULL!	0	2	2	2	2	2	2	2	2	2	2	2	2	2	2	2	2	0
tmvwd7mbojcuxx5a9lzdnu015nko5m38	1	24840765	en	2014/11/24 12:27:43 PM	2014/11/24 1:21:17 PM	Tennessee	Google Chrome	Other		sample-provider=Cint&respondent=b96bf6cc-c030-485d-8184-9310b8edc198	http://s.cint.com/Survey/Fingerprint/b96bf6cc-c030-485d-8184-9310b8edc198?sq=1		2101.0	[1, 2, 3, 4, 5, 6, 7, 8, 9]	00:53:33	24.183.227.20					0	2006	2	0	#NULL!	#NULL!	#NULL!	#NULL!	#NULL!	#NULL!	#NULL!	0	2	1	0	0	1	4	1	0	0	2	0	2	0	0	0	0	4
mr7umaph6fce91abk0r00ocwwgkfrlpd	1	24827201	en	2014/11/24 10:22:02 AM	2014/11/24 10:44:16 AM	United States	Firefox	Other		sample-provider=Cint&respondent=7a30d9db-3748-4265-9547-fa73bc99a2fd	http://s.cint.com/Survey/Fingerprint/7a30d9db-3748-4265-9547-fa73bc99a2fd?sq=1		2101.0	[1, 2, 3, 4, 5, 6, 7, 8, 9]	00:22:14	107.185.137.10					1	2003	8	#NULL!	#NULL!	#NULL!	#NULL!	4	#NULL!	#NULL!	#NULL!	0	2	2	0	0	1	0	1	0	0	0	0	0	0	0	0	0	5
7k1tubegvf3s75t7ow9gcq6ddbnidpgi	0	24812527	en	2014/11/24 7:18:27 AM	2014/11/24 8:23:32 AM	Wisconsin	Google Chrome	Android		sample-provider=Cint&respondent=f660be31-a972-46a8-81dd-16d0a46fe6a3	http://s.cint.com/Survey/Fingerprint/f660be31-a972-46a8-81dd-16d0a46fe6a3		2043.0	[1, 2, 3, 4, 5, 6, 7]	00:05:59	65.30.208.65					0	2007	4	#NULL!	#NULL!	2	#NULL!	#NULL!	#NULL!	#NULL!	#NULL!	0	1	0	0	0	0	0	2	0	0	0	0	0	0	0	0	2	4
2dc5978vip82bba1essgzv0fcgbaxx2j	0	24873511	en	2014/11/24 7:41:55 PM	2014/11/24 7:48:36 PM		Google Chrome	Android		sample-provider=Cint&respondent=5042e6eb-771f-4530-95a6-409ff0e70b76	http://s.cint.com/Survey/Fingerprint/5042e6eb-771f-4530-95a6-409ff0e70b76?sq=1		2076.0	[1, 2, 3, 4, 5, 6, 7]	00:06:39	2607:fb90:42c:3					0	2004	12	#NULL!	1	#NULL!	#NULL!	#NULL!	#NULL!	#NULL!	#NULL!	0	5	5	0	0	1	3	1	0	0	2	0	0	0	0	0	0	5
wm2qhaeytfisn1d8halxdnbiip2huja2	0	24837373	en	2014/11/24 11:58:40 AM	2014/11/26 5:51:29 AM	New York	Google Chrome	Other		sample-provider=Cint&respondent=a8974ecf-2605-4ee2-a5e9-8399b4763324	http://s.cint.com/Survey/Fingerprint/a8974ecf-2605-4ee2-a5e9-8399b4763324?sq=1		2076.0	[1, 2, 3, 4, 5, 6, 7]	10:08:39	216.227.83.188					1	2007	11	0	#NULL!	#NULL!	#NULL!	#NULL!	#NULL!	#NULL!	#NULL!	0	5	0	5	0	3	1	1	0	0	5	0	0	0	0	0	0	4
oxomtyy1rn28scu57c9atwehu2mudei6	0	24874803	en	2014/11/24 8:07:23 PM	2014/11/24 8:10:51 PM	Maine	Internet Explorer	Other		sample-provider=Cint&respondent=c1760f1a-eb81-445d-95c9-3caea4d0cc23	http://s.cint.com/Survey/Fingerprint/c1760f1a-eb81-445d-95c9-3caea4d0cc23?sq=1		2071.0	[1, 2, 3, 4, 5, 6, 7, 8]	00:03:28	74.75.165.105					0	2004	8	0	#NULL!	#NULL!	#NULL!	#NULL!	#NULL!	#NULL!	#NULL!	0	5	3	0	0	1	0	0	0	0	0	0	0	0	0	0	3	2
pg9w9kolz6jo2gmf812pcwlefz64sr2f	1	24821841	en	2014/11/24 9:36:25 AM	2014/11/24 9:43:25 AM	New York	Google Chrome	Other		sample-provider=Cint&respondent=c5da1ce2-f84f-44cf-9abd-a1f5ab668f61	http://s.cint.com/Survey/Fingerprint/c5da1ce2-f84f-44cf-9abd-a1f5ab668f61?sq=1		2179.0	[1, 2, 3, 4, 5, 6, 7, 8, 9]	00:06:59	67.85.41.28					1	2004	6	0	1	#NULL!	#NULL!	4	#NULL!	#NULL!	#NULL!	0	2	2	3	0	2	3	3	5	5	3	3	2	3	2	2	3	4
kmvdkw3cvfcectjevgjvtp43b10h4y97	1	24827593	en	2014/11/24 10:26:12 AM	2014/11/24 10:34:24 AM	Michigan	Firefox	Other		sample-provider=Cint&respondent=83c24cb8-5575-44ff-bd05-23645445afef	http://s.cint.com/Survey/Fingerprint/83c24cb8-5575-44ff-bd05-23645445afef?sq=1		2160.0	[1, 2, 3, 4, 5, 6, 7, 8, 9]	00:08:11	76.219.129.47					0	2006	8	0	#NULL!	#NULL!	#NULL!	#NULL!	#NULL!	#NULL!	#NULL!	1	4	2	2	2	2	3	2	0	0	0	3	3	2	0	2	2	3
i68ys65ccbeylx827e56llz2oyzxxxuy	1	24844057	en	2014/11/24 1:03:37 PM	2014/11/24 1:15:56 PM	New York	Google Chrome	Other		sample-provider=Cint&respondent=6b7b9964-0455-45dd-9742-7086cb8b7a66	http://s.cint.com/Survey/Fingerprint/6b7b9964-0455-45dd-9742-7086cb8b7a66?sq=1		2179.0	[1, 2, 3, 4, 5, 6, 7, 8, 9]	00:12:19	66.65.1.180					0	2007	2	#NULL!	1	#NULL!	#NULL!	#NULL!	#NULL!	#NULL!	#NULL!	0	5	3	5	5	5	5	5	5	5	3	3	4	2	2	2	2	5
9lqsctxa9v0tm9mmae0h0qi166xfls64	1	24859417	en	2014/11/24 4:01:43 PM	2014/11/24 4:09:07 PM	United States	Google Chrome	iPad		sample-provider=Cint&respondent=56ac3e4e-be0c-4686-816f-a6e7927c1d1c	http://s.cint.com/Survey/Fingerprint/56ac3e4e-be0c-4686-816f-a6e7927c1d1c?sq=1		2167.0	[1, 2, 3, 4, 5, 6, 7, 8, 9]	00:07:24	73.185.220.133					1	2006	9	0	#NULL!	#NULL!	#NULL!	#NULL!	#NULL!	#NULL!	#NULL!	0	5	2	5	0	3	5	5	0	0	2	0	5	1	0	1	3	5
s1k5jixsrrgkz59uzbx3yujdw8m348gg	1	24868391	en	2014/11/24 6:35:56 PM	2014/11/24 6:42:22 PM	Arizona	Internet Explorer	Other		sample-provider=Cint&respondent=1b6f6378-1f61-4d68-86f9-a18e75590e40	http://s.cint.com/Survey/Fingerprint/1b6f6378-1f61-4d68-86f9-a18e75590e40?sq=1		2159.0	[1, 2, 3, 4, 5, 6, 7, 8, 9]	00:06:25	72.222.206.22					0	2006	8	0	#NULL!	#NULL!	#NULL!	#NULL!	#NULL!	#NULL!	#NULL!	0	5	3	5	0	2	0	2	5	5	3	0	2	0	0	0	0	3
byrkdyuhw8vxg7vjf3436eobdyihhkfs	1	24884297	en	2014/11/24 11:43:28 PM	2014/11/24 11:48:26 PM	Minnesota	Firefox	Other		sample-provider=Cint&respondent=16e6bd19-a51f-44eb-b3d3-2f89d89e7568	http://s.cint.com/Survey/Fingerprint/16e6bd19-a51f-44eb-b3d3-2f89d89e7568?sq=1		2123.0	[1, 2, 3, 4, 5, 6, 7, 8, 9]	00:04:58	66.41.30.203					1	2007	9	0	#NULL!	#NULL!	#NULL!	#NULL!	#NULL!	#NULL!	#NULL!	0	3	2	0	0	2	3	2	2	2	2	0	2	0	0	0	2	5
ew96o59fxnegf21krrn0dfw0s4za301m	1	24883303	en	2014/11/24 11:02:49 PM	2014/11/24 11:07:32 PM	California	Firefox	Other		sample-provider=Cint&respondent=ec288dc4-f10f-4800-a9c9-90c81b228956	http://s.cint.com/Survey/Fingerprint/ec288dc4-f10f-4800-a9c9-90c81b228956?sq=1		2172.0	[1, 2, 3, 4, 5, 6, 7, 8, 9]	00:04:43	173.60.175.131					0	2004	6	#NULL!	1	#NULL!	#NULL!	#NULL!	#NULL!	#NULL!	#NULL!	0	5	5	0	0	4	5	2	5	5	0	0	3	3	3	3	0	0
m3kfkp69kjh2d37xp62d28hfihh3hubc	1	24804931	en	2014/11/24 5:11:41 AM	2014/11/24 5:15:56 AM	Maine	Google Chrome	Other		sample-provider=Cint&respondent=cbb761fd-ddc7-4bc6-a640-d011b5b6c680	http://s.cint.com/Survey/Fingerprint/cbb761fd-ddc7-4bc6-a640-d011b5b6c680?sq=1		2136.0	[1, 2, 3, 4, 5, 6, 7, 8, 9]	00:04:15	72.224.69.64					0	2004	2	0	#NULL!	#NULL!	#NULL!	#NULL!	#NULL!	#NULL!	#NULL!	0	5	5	1	1	3	5	5	0	0	4	4	4	4	1	0	4	5
qc3yupdol2esgm9270bi26qne9rletqd	1	24851961	en	2014/11/24 2:31:04 PM	2014/11/24 2:39:48 PM	South Carolina	Google Chrome	Other		sample-provider=Cint&respondent=f647a5fa-886c-4525-abb0-90decc00f815	http://s.cint.com/Survey/Fingerprint/f647a5fa-886c-4525-abb0-90decc00f815?sq=1		2199.0	[1, 2, 3, 4, 5, 6, 7, 8, 9]	00:08:44	108.248.188.193					1	2006	2	#NULL!	#NULL!	2	#NULL!	#NULL!	#NULL!	#NULL!	#NULL!	0	5	5	5	5	5	5	4	2	5	5	5	5	5	4	4	3	5
nleszkbnzefym4s3c6lwvlttlchswadj	1	24853989	en	2014/11/24 2:53:47 PM	2014/11/24 2:55:32 PM	New York	Internet Explorer	Other		sample-provider=Cint&respondent=1ff10990-287f-4600-8a72-ad7167a6c998	http://s.cint.com/Survey/Fingerprint/1ff10990-287f-4600-8a72-ad7167a6c998?sq=1		2222.0	[1, 2, 3, 4, 5, 6, 7, 8, 9]	00:01:44	173.68.177.247					1	2006	3	0	#NULL!	#NULL!	#NULL!	#NULL!	#NULL!	#NULL!	#NULL!	1	5	4	4	5	5	5	4	5	5	5	4	5	4	5	5	3	5
pxu9thtuxq1qidr1ijfye9kq8ihiwqz4	1	24878845	en	2014/11/24 9:14:27 PM	2014/11/24 9:19:03 PM	Texas	Safari	Other		sample-provider=Cint&respondent=0819b78c-fde1-49ad-b08c-631b43a99cd6	http://s.cint.com/Survey/Fingerprint/0819b78c-fde1-49ad-b08c-631b43a99cd6?sq=1		2132.0	[1, 2, 3, 4, 5, 6, 7, 8, 9]	00:04:36	70.112.204.114					0	2005	3	0	#NULL!	#NULL!	#NULL!	#NULL!	#NULL!	#NULL!	#NULL!	0	4	3	5	2	2	0	1	0	0	4	0	2	0	0	0	2	4
sjgm1d3qjoec7r6ewyt57ozjksikyav4	1	24865485	en	2014/11/24 5:34:39 PM	2014/11/24 5:40:09 PM	California	Internet Explorer	Other		sample-provider=Cint&respondent=f0f98871-161c-444b-81d3-4228b5d2a407	http://s.cint.com/Survey/Fingerprint/f0f98871-161c-444b-81d3-4228b5d2a407?sq=1		2164.0	[1, 2, 3, 4, 5, 6, 7, 8, 9]	00:05:30	24.205.144.138					1	2007	5	0	#NULL!	#NULL!	#NULL!	#NULL!	#NULL!	#NULL!	#NULL!	0	5	2	5	2	1	5	1	5	5	5	2	2	0	1	1	2	5
1f58bbi7m493wxmcxyhvo73muif7th2s	1	24833361	en	2014/11/24 11:22:04 AM	2014/11/24 11:27:25 AM	Georgia	Firefox	Other		sample-provider=Cint&respondent=9189a315-dfca-4adf-bade-32e448325e7a	http://s.cint.com/Survey/Fingerprint/9189a315-dfca-4adf-bade-32e448325e7a		2154.0	[1, 2, 3, 4, 5, 6, 7, 8, 9]	00:05:19	76.17.40.241					1	2003	1	0	#NULL!	#NULL!	#NULL!	#NULL!	#NULL!	#NULL!	#NULL!	0	5	5	0	0	5	5	5	0	0	5	0	5	5	5	5	0	0
cfjs6kjh2i8w7i8vg9by3508paiw8ooz	1	24857457	en	2014/11/24 3:34:05 PM	2014/11/24 3:38:36 PM	North Carolina	Internet Explorer	Other		sample-provider=Cint&respondent=76b20c16-0829-4b1a-ae4a-d51d9d6699e0	http://s.cint.com/Survey/Fingerprint/76b20c16-0829-4b1a-ae4a-d51d9d6699e0?sq=1		2132.0	[1, 2, 3, 4, 5, 6, 7, 8, 9]	00:04:31	65.191.95.63					1	2003	7	0	#NULL!	#NULL!	#NULL!	#NULL!	#NULL!	#NULL!	#NULL!	0	3	2	3	2	1	0	1	4	4	3	0	0	0	0	0	3	0
chsrdyllubuthech040j3ruhvm3zqrmq	1	24847777	en	2014/11/24 1:44:01 PM	2014/11/24 1:48:16 PM	Wisconsin	Internet Explorer	Other		sample-provider=Cint&respondent=c7fc9577-9b8a-409c-ae60-3ca27daff0de	http://s.cint.com/Survey/Fingerprint/c7fc9577-9b8a-409c-ae60-3ca27daff0de		2145.0	[1, 2, 3, 4, 5, 6, 7, 8, 9]	00:04:14	71.90.56.196					0	2004	8	0	#NULL!	#NULL!	#NULL!	#NULL!	#NULL!	#NULL!	#NULL!	0	2	2	1	1	3	2	1	2	3	2	1	2	0	0	0	0	5
op4xov4v8yckwx4uaj4ldf31l0aslgn4	1	24865527	en	2014/11/24 5:35:20 PM	2014/11/24 5:37:48 PM	United States	Google Chrome	Other		sample-provider=Cint&respondent=0b18c828-821b-4a4d-8c3c-50f5f3620671	http://s.cint.com/Survey/Fingerprint/0b18c828-821b-4a4d-8c3c-50f5f3620671?sq=1		2235.0	[1, 2, 3, 4, 5, 6, 7, 8, 9]	00:02:27	146.82.18.248					0	2007	7	0	#NULL!	#NULL!	#NULL!	#NULL!	#NULL!	#NULL!	#NULL!	1	5	5	5	5	5	5	5	5	5	5	5	5	5	5	0	5	5
j6jg6gwmz4zhsjzqkepyzm95wd6zijry	1	24867289	en	2014/11/24 6:12:55 PM	2014/11/24 6:21:07 PM	Florida	Safari	Other		sample-provider=Cint&respondent=758319dd-4af2-47fa-8142-3b7c31694678	http://s.cint.com/Survey/Fingerprint/758319dd-4af2-47fa-8142-3b7c31694678?sq=1		2143.0	[1, 2, 3, 4, 5, 6, 7, 8, 9]	00:08:12	68.204.74.78					1	2005	3	0	1	#NULL!	3	#NULL!	#NULL!	#NULL!	#NULL!	0	5	5	5	5	5	1	1	0	0	5	0	5	0	0	0	0	4
jump6um89qekn855yd9ibs9ma53rtolf	1	24815269	en	2014/11/24 8:11:46 AM	2014/11/24 8:18:29 AM	Indiana	Google Chrome	Other		sample-provider=Cint&respondent=7e12562a-8178-4a35-9210-751e82ae982b	http://s.cint.com/Survey/Fingerprint/7e12562a-8178-4a35-9210-751e82ae982b?sq=1		2138.0	[1, 2, 3, 4, 5, 6, 7, 8, 9]	00:06:42	108.69.125.67					1	2006	9	0	#NULL!	#NULL!	#NULL!	#NULL!	#NULL!	#NULL!	#NULL!	0	2	2	2	0	1	0	2	0	0	2	2	1	0	0	0	2	2
r0uf6dspsxd9k14rieb7ju2s3nrvx7bn	1	24883513	en	2014/11/24 11:10:26 PM	2014/11/24 11:13:38 PM	New York	Google Chrome	Other		sample-provider=Cint&respondent=62d8f249-488d-4c1a-954c-73724da9f8f4	http://s.cint.com/Survey/Fingerprint/62d8f249-488d-4c1a-954c-73724da9f8f4?sq=1		2153.0	[1, 2, 3, 4, 5, 6, 7, 8, 9]	00:03:11	173.52.220.137					0	2004	6	#NULL!	#NULL!	2	#NULL!	#NULL!	#NULL!	#NULL!	#NULL!	0	5	4	3	3	3	4	2	0	0	3	3	3	0	0	0	3	4
ydfidt7xixu8yo7rt8w4a5sthlnwvis5	1	24820109	en	2014/11/24 9:16:43 AM	2014/11/24 9:23:12 AM	Tennessee	Internet Explorer	Other		sample-provider=Cint&respondent=0080ef12-480b-44ba-9edb-9638e1372397	http://s.cint.com/Survey/Fingerprint/0080ef12-480b-44ba-9edb-9638e1372397?sq=1		2147.0	[1, 2, 3, 4, 5, 6, 7, 8, 9]	00:06:29	50.142.108.8					0	2004	2	0	#NULL!	#NULL!	#NULL!	#NULL!	#NULL!	#NULL!	#NULL!	0	5	1	0	0	5	5	0	0	0	5	5	5	0	0	2	3	3
wbz41ulvrwm1nus7ffdaivdnud90gcc2	1	24880843	en	2014/11/24 9:44:19 PM	2014/11/24 9:48:35 PM	Florida	Firefox	Other		sample-provider=Cint&respondent=be9c234c-61dd-459c-9ac6-1acc23441e4c	http://s.cint.com/Survey/Fingerprint/be9c234c-61dd-459c-9ac6-1acc23441e4c?sq=1		2180.0	[1, 2, 3, 4, 5, 6, 7, 8, 9]	00:04:15	72.239.119.145					1	2006	5	0	#NULL!	#NULL!	#NULL!	#NULL!	#NULL!	#NULL!	#NULL!	0	5	2	3	4	2	4	3	3	3	2	3	4	2	3	2	3	4
1h6w00pc4dzwgwmpnc4nfcfo3yeca29i	1	24813589	en	2014/11/24 7:39:55 AM	2014/11/24 7:43:35 AM	North Carolina	Internet Explorer	Other		sample-provider=Cint&respondent=8347b1c3-3675-43f0-9264-d861f955a842	http://s.cint.com/Survey/Fingerprint/8347b1c3-3675-43f0-9264-d861f955a842		2130.0	[1, 2, 3, 4, 5, 6, 7, 8, 9]	00:03:39	208.104.139.219					0	2006	3	0	#NULL!	#NULL!	#NULL!	#NULL!	#NULL!	#NULL!	#NULL!	0	4	4	5	3	2	4	2	0	0	3	1	1	0	0	0	3	5
7id12xvj2tx3ix6jxwy154nhq0olz3n5	1	24873529	en	2014/11/24 7:42:14 PM	2014/11/24 8:29:55 PM	New Jersey	Internet Explorer	Other		sample-provider=Cint&respondent=23d60df6-df79-40f0-8bc6-9783958d1b6b	http://s.cint.com/Survey/Fingerprint/23d60df6-df79-40f0-8bc6-9783958d1b6b?sq=1		2225.0	[1, 2, 3, 4, 5, 6, 7, 8, 9]	00:47:40	67.82.17.110					1	2006	12	0	#NULL!	#NULL!	#NULL!	#NULL!	#NULL!	#NULL!	#NULL!	0	5	5	5	5	5	5	5	4	4	4	4	4	4	5	5	5	5
c42igoapl17ost3jle0x0i3ysl5u4x2y	1	24846911	en	2014/11/24 1:33:28 PM	2014/11/24 1:40:31 PM	United States	Google Chrome	Other		sample-provider=Cint&respondent=a5f67f6d-c144-4dbb-96e2-fd6b0210373a	http://s.cint.com/Survey/Fingerprint/a5f67f6d-c144-4dbb-96e2-fd6b0210373a?sq=1		2139.0	[1, 2, 3, 4, 5, 6, 7, 8, 9]	00:07:02	104.50.169.80					0	2007	9	0	#NULL!	#NULL!	#NULL!	#NULL!	#NULL!	#NULL!	#NULL!	0	3	0	2	1	3	0	3	4	4	3	0	3	3	2	0	1	4
k91j767t8rsqshwy4br08wzkix3x2blu	1	24823077	en	2014/11/24 9:49:41 AM	2014/11/24 9:56:47 AM	Florida	Safari	Android		sample-provider=Cint&respondent=e30aaf02-e6e7-467c-ad1b-180d6ee84f26	http://s.cint.com/Survey/Fingerprint/e30aaf02-e6e7-467c-ad1b-180d6ee84f26?sq=1		2128.0	[1, 2, 3, 4, 5, 6, 7, 8, 9]	00:07:05	173.209.211.146					1	2004	8	0	#NULL!	#NULL!	#NULL!	#NULL!	#NULL!	#NULL!	#NULL!	0	5	2	0	0	2	1	2	0	0	2	0	0	0	0	0	2	5
5pnd7qklmz12al6dv47zvipu6dlzjgxq	1	24838967	en	2014/11/24 12:12:23 PM	2014/11/24 12:18:56 PM	California	Google Chrome	Other		sample-provider=Cint&respondent=2012dd8e-8b26-45de-8534-adddf4a9c0a0	http://s.cint.com/Survey/Fingerprint/2012dd8e-8b26-45de-8534-adddf4a9c0a0?sq=1		2149.0	[1, 2, 3, 4, 5, 6, 7, 8, 9]	00:06:31	99.96.12.82					1	2004	10	0	#NULL!	#NULL!	#NULL!	#NULL!	#NULL!	#NULL!	#NULL!	1	3	1	2	2	1	2	2	1	0	1	1	1	1	0	0	2	2
o5nk24rrah5epojlplsv1ok2dd39jxon	1	24851759	en	2014/11/24 2:28:40 PM	2014/11/24 2:38:14 PM	California	Google Chrome	Other		sample-provider=Cint&respondent=cd9ec762-b6f1-4dc7-93ec-0f4d3122536a	http://s.cint.com/Survey/Fingerprint/cd9ec762-b6f1-4dc7-93ec-0f4d3122536a?sq=1		2109.0	[1, 2, 3, 4, 5, 6, 7, 8, 9]	00:09:33	71.193.28.249					1	2003	3	0	#NULL!	#NULL!	#NULL!	#NULL!	#NULL!	#NULL!	#NULL!	0	4	4	0	0	2	4	1	0	0	0	0	2	0	0	0	0	5
bza1gan7nm20y11za3g6wo9d17rmji02	1	24843483	en	2014/11/24 12:56:29 PM	2014/11/24 1:00:49 PM	California	Google Chrome	Other		sample-provider=Cint&respondent=d34353ac-1400-4723-8a6b-8e44390c81c4	http://s.cint.com/Survey/Fingerprint/d34353ac-1400-4723-8a6b-8e44390c81c4?sq=1		2119.0	[1, 2, 3, 4, 5, 6, 7, 8, 9]	00:04:19	23.255.247.29					1	2006	1	0	#NULL!	#NULL!	3	#NULL!	#NULL!	#NULL!	#NULL!	0	5	1	0	0	2	0	2	0	0	0	0	0	0	0	0	0	3
ep2dfyumzx1wb01hmtmqwx54mkwazlzd	1	24829201	en	2014/11/24 10:42:21 AM	2014/11/24 10:54:06 AM	United States	Google Chrome	Other		sample-provider=Cint&respondent=857e4b6e-59c7-47f6-a3c3-879717cfe048	http://s.cint.com/Survey/Fingerprint/857e4b6e-59c7-47f6-a3c3-879717cfe048		2133.0	[1, 2, 3, 4, 5, 6, 7, 8, 9]	00:11:44	50.108.161.85					1	2005	12	0	#NULL!	#NULL!	#NULL!	#NULL!	#NULL!	#NULL!	#NULL!	0	3	0	0	0	1	0	1	0	0	0	0	0	0	0	0	0	4
aiwcy9p29wvhdzhe3ef9ynyceg90uxlj	1	24877883	en	2014/11/24 9:01:05 PM	2014/11/24 9:06:20 PM	North Carolina	Firefox	Other		sample-provider=Cint&respondent=c80d27e5-d3b2-44a8-86bf-dfddcf5befbd	http://s.cint.com/Survey/Fingerprint/c80d27e5-d3b2-44a8-86bf-dfddcf5befbd?sq=1		2142.0	[1, 2, 3, 4, 5, 6, 7, 8, 9]	00:05:14	108.232.14.63					0	2003	7	0	#NULL!	#NULL!	#NULL!	#NULL!	#NULL!	#NULL!	#NULL!	0	4	3	5	2	3	1	3	0	0	3	0	3	0	0	0	4	4
drkf5x9hp4s4rq1kkjs8j1z6x33w1aki	1	24862393	en	2014/11/24 4:42:30 PM	2014/11/24 7:16:01 PM	Florida	Safari	iPhone/iPod		sample-provider=Cint&respondent=22d103c7-688e-4a43-b527-6ea176367bef	http://s.cint.com/Survey/Fingerprint/22d103c7-688e-4a43-b527-6ea176367bef?sq=1		2134.0	[1, 2, 3, 4, 5, 6, 7, 8, 9]	00:25:35	70.193.211.59					1	2005	8	0	#NULL!	#NULL!	#NULL!	#NULL!	5	#NULL!	#NULL!	0	3	1	2	1	3	0	2	2	1	1	0	2	0	1	1	1	3
hakcuktx3d0mg44pghvdd8bv5kpcvt7y	1	24811583	en	2014/11/24 7:04:03 AM	2014/11/24 7:07:43 AM	North Carolina	Google Chrome	Other		sample-provider=Cint&respondent=bcda03d9-18b1-4a1a-8194-5e549ab14769	http://s.cint.com/Survey/Fingerprint/bcda03d9-18b1-4a1a-8194-5e549ab14769		2132.0	[1, 2, 3, 4, 5, 6, 7, 8, 9]	00:03:40	173.95.157.24					1	2006	7	#NULL!	1	#NULL!	#NULL!	#NULL!	#NULL!	#NULL!	#NULL!	0	5	1	2	0	2	3	2	0	0	1	2	2	0	1	1	2	2
wwuytwa8wwk77m0a7uxqi0uetdzrgp78	1	24818319	en	2014/11/24 9:04:21 AM	2014/11/24 9:15:18 AM	Virginia	Safari	Other		sample-provider=Cint&respondent=e77ddf5c-74e9-4347-900e-729b9afc7a12	http://s.cint.com/Survey/Fingerprint/e77ddf5c-74e9-4347-900e-729b9afc7a12?sq=1		2118.0	[1, 2, 3, 4, 5, 6, 7, 8, 9]	00:10:57	24.127.124.78					1	2007	11	0	#NULL!	#NULL!	#NULL!	#NULL!	#NULL!	#NULL!	#NULL!	0	4	3	0	0	0	0	3	0	0	3	0	3	0	0	0	0	2
5b53b3xqto977ob8t17kjkankerh7x0p	1	24831837	en	2014/11/24 11:06:38 AM	2014/11/24 11:09:14 AM	Pennsylvania	Internet Explorer	Other		sample-provider=Cint&respondent=ac422dd9-9945-4480-8b81-b541b37d19d3	http://s.cint.com/Survey/Fingerprint/ac422dd9-9945-4480-8b81-b541b37d19d3		2117.0	[1, 2, 3, 4, 5, 6, 7, 8, 9]	00:02:35	69.95.87.58					1	2005	12	0	#NULL!	#NULL!	#NULL!	#NULL!	#NULL!	#NULL!	#NULL!	0	3	0	0	0	2	4	0	0	0	0	0	0	0	0	0	2	2
ytrk3uergk9e7o1ycv9sqaunk2d08kpd	1	24860283	en	2014/11/24 4:13:12 PM	2014/11/24 4:28:55 PM	California	Google Chrome	Other		sample-provider=Cint&respondent=bd699e2d-b5e7-4264-bcbf-deb24aade323	http://s.cint.com/Survey/Fingerprint/bd699e2d-b5e7-4264-bcbf-deb24aade323?sq=1		2120.0	[1, 2, 3, 4, 5, 6, 7, 8, 9]	00:15:43	12.22.206.194					1	2004	9	0	#NULL!	#NULL!	#NULL!	#NULL!	#NULL!	#NULL!	#NULL!	0	5	1	5	0	2	0	5	0	0	1	0	1	1	0	0	2	4
seb7e0r2a23fl13ufv2n719w9ps9zam0	1	24829335	en	2014/11/24 10:43:37 AM	2014/11/24 10:47:17 AM	Missouri	Google Chrome	Other		sample-provider=Cint&respondent=bea02c99-06a7-4605-8560-c89c39b684a5	http://s.cint.com/Survey/Fingerprint/bea02c99-06a7-4605-8560-c89c39b684a5		2141.0	[1, 2, 3, 4, 5, 6, 7, 8, 9]	00:03:39	66.148.239.198					1	2003	9	0	#NULL!	#NULL!	#NULL!	#NULL!	#NULL!	#NULL!	#NULL!	1	4	4	4	0	1	0	4	0	0	2	0	4	0	0	0	2	4
8z470zonn2fjunuo3ywl9g3ivy95d8l9	1	24870781	en	2014/11/24 7:30:54 PM	2014/11/24 7:35:49 PM	Alabama	Google Chrome	Other		sample-provider=Cint&respondent=ba624af8-5a62-4d4c-aaf6-f22f6dae506e	http://s.cint.com/Survey/Fingerprint/ba624af8-5a62-4d4c-aaf6-f22f6dae506e?sq=1		2108.0	[1, 2, 3, 4, 5, 6, 7, 8, 9]	00:04:52	192.251.189.113					0	2004	5	#NULL!	#NULL!	2	#NULL!	#NULL!	#NULL!	#NULL!	#NULL!	0	5	5	1	0	4	5	0	0	0	1	2	0	0	0	0	1	1
9y6vk5v63g6gjyqz7rxikrgomyirx4f8	1	24847651	en	2014/11/24 1:42:35 PM	2014/11/24 1:49:51 PM	Wyoming	Firefox	Other		sample-provider=Cint&respondent=0f3a64ed-982c-4a92-9aa0-aca27e7d4e53	http://s.cint.com/Survey/Fingerprint/0f3a64ed-982c-4a92-9aa0-aca27e7d4e53?sq=1		2130.0	[1, 2, 3, 4, 5, 6, 7, 8, 9]	00:07:15	104.36.42.244					0	2004	4	0	#NULL!	#NULL!	#NULL!	#NULL!	#NULL!	#NULL!	#NULL!	0	5	2	3	0	3	0	4	0	0	3	0	3	0	0	0	2	3
iqcetlkg1pkd0qpxrbjr0situd3p1536	1	24814165	en	2014/11/24 7:51:34 AM	2014/11/24 7:56:56 AM	United States	Firefox	Other		sample-provider=Cint&respondent=e363396d-209d-419a-9096-81cd2d21d76b	http://s.cint.com/Survey/Fingerprint/e363396d-209d-419a-9096-81cd2d21d76b		2097.0	[1, 2, 3, 4, 5, 6, 7, 8, 9]	00:05:22	184.6.22.15					1	2005	5	0	#NULL!	#NULL!	#NULL!	#NULL!	#NULL!	#NULL!	#NULL!	0	4	2	3	0	1	0	0	0	0	2	0	0	0	0	0	0	4
8j1x6o1bw3zjswygtezu76pblvl6gepl	1	24868147	en	2014/11/24 6:30:39 PM	2014/11/24 6:35:49 PM	Georgia	Google Chrome	Other		sample-provider=Cint&respondent=a6ea7cd1-4d28-406e-b840-ecaf7c483e84	http://s.cint.com/Survey/Fingerprint/a6ea7cd1-4d28-406e-b840-ecaf7c483e84?sq=1		2128.0	[1, 2, 3, 4, 5, 6, 7, 8, 9]	00:05:09	67.202.183.236					0	2007	4	0	#NULL!	#NULL!	#NULL!	#NULL!	#NULL!	#NULL!	#NULL!	0	5	3	3	0	2	0	0	0	0	2	0	0	0	0	0	3	3
1u0008hcq348jd3kmuh2kuhg3jlno9s6	1	24857721	en	2014/11/24 3:37:57 PM	2014/11/24 3:53:21 PM	United States	Firefox	Other		sample-provider=Cint&respondent=89713645-6eec-44d3-803d-fc9a34f49543	http://s.cint.com/Survey/Fingerprint/89713645-6eec-44d3-803d-fc9a34f49543?sq=1		2147.0	[1, 2, 3, 4, 5, 6, 7, 8, 9]	00:15:24	66.87.68.46					0	2006	1	0	#NULL!	#NULL!	#NULL!	4	#NULL!	#NULL!	#NULL!	0	5	2	2	0	3	0	2	0	0	2	2	2	3	0	2	2	0
hn5kea5iguhpwi5b87tropad7uaqx36y	1	24826903	en	2014/11/24 10:19:31 AM	2014/11/24 10:25:35 AM	Utah	Firefox	Other		sample-provider=Cint&respondent=0bb64ec1-cf65-40f9-b51f-04d2d593770b	http://s.cint.com/Survey/Fingerprint/0bb64ec1-cf65-40f9-b51f-04d2d593770b?sq=1		2145.0	[1, 2, 3, 4, 5, 6, 7, 8, 9]	00:06:03	76.27.10.237					1	2007	4	#NULL!	1	#NULL!	#NULL!	#NULL!	#NULL!	#NULL!	#NULL!	0	2	0	2	1	2	0	0	1	4	4	1	2	1	1	1	2	2
vew92k0ftmfeqjgccwqwiw2kc25hf1ve	1	24883313	en	2014/11/24 11:03:17 PM	2014/11/24 11:09:14 PM	Texas	Google Chrome	Other		sample-provider=Cint&respondent=ab65f9c7-7659-4dd9-8140-16f97d6774c8	http://s.cint.com/Survey/Fingerprint/ab65f9c7-7659-4dd9-8140-16f97d6774c8?sq=1		2143.0	[1, 2, 3, 4, 5, 6, 7, 8, 9]	00:05:55	24.155.216.91					0	2005	7	#NULL!	1	#NULL!	#NULL!	#NULL!	#NULL!	#NULL!	#NULL!	0	4	2	0	0	2	2	2	0	0	0	0	0	0	0	0	2	4
3w4jqwkwv4qsweg6dnl8ea0tiigwn095	1	24838451	en	2014/11/24 12:08:17 PM	2014/11/24 12:17:12 PM	Pennsylvania	Google Chrome	Other		sample-provider=Cint&respondent=65fb1343-fcee-4056-b897-5d0320521f87	http://s.cint.com/Survey/Fingerprint/65fb1343-fcee-4056-b897-5d0320521f87		2114.0	[1, 2, 3, 4, 5, 6, 7, 8, 9]	00:08:55	72.95.138.9					0	2003	3	0	#NULL!	#NULL!	#NULL!	#NULL!	#NULL!	#NULL!	#NULL!	0	5	2	1	0	2	2	0	0	0	5	0	5	5	0	0	0	0
972siagv2ur35rfxs5l35o073lr6bvi2	1	24826509	en	2014/11/24 10:15:07 AM	2014/11/24 10:19:00 AM	Ohio	Safari	Other		sample-provider=Cint&respondent=b5b5ae0e-8f5c-4fba-8468-68213c403811	http://s.cint.com/Survey/Fingerprint/b5b5ae0e-8f5c-4fba-8468-68213c403811?sq=1		2126.0	[1, 2, 3, 4, 5, 6, 7, 8, 9]	00:03:53	74.83.19.132					0	2005	1	0	#NULL!	#NULL!	#NULL!	#NULL!	#NULL!	#NULL!	#NULL!	1	3	2	3	3	2	4	2	0	0	2	0	0	0	0	0	4	5
df5z7cvicw8dk2sztfk45vo5d4zlltk1	1	24839201	en	2014/11/24 12:14:14 PM	2014/11/24 3:48:29 PM	California	Google Chrome	Other		sample-provider=Cint&respondent=c1133a26-5d62-4cab-aebc-e93e1974596e	http://s.cint.com/Survey/Fingerprint/c1133a26-5d62-4cab-aebc-e93e1974596e?sq=1		2119.0	[1, 2, 3, 4, 5, 6, 7, 8, 9]	03:34:15	67.53.124.242					1	2007	5	0	#NULL!	#NULL!	#NULL!	#NULL!	#NULL!	#NULL!	#NULL!	0	4	2	0	0	2	0	1	0	0	2	2	2	1	0	2	2	3
mxphwda7tpts99jgbuoeo4fx4zr7nu0n	1	24822615	en	2014/11/24 9:44:25 AM	2014/11/24 9:51:02 AM	Florida	Google Chrome	Other		sample-provider=Cint&respondent=f84fb99e-1284-419d-8259-828015e7042c	http://s.cint.com/Survey/Fingerprint/f84fb99e-1284-419d-8259-828015e7042c?sq=1		2143.0	[1, 2, 3, 4, 5, 6, 7, 8, 9]	00:06:35	68.200.195.218					0	2007	12	0	#NULL!	#NULL!	#NULL!	#NULL!	#NULL!	#NULL!	#NULL!	1	5	2	0	0	3	1	2	0	0	0	1	3	0	0	0	2	4
7vbqmbww08gjt8lfuwqehgtkbpxiuwxr	1	24829359	en	2014/11/24 10:43:52 AM	2014/11/24 12:24:11 PM	Massachusetts	Internet Explorer	Other		sample-provider=Cint&respondent=e9ac13e0-b57d-4645-af05-fe74968c0bb5	http://s.cint.com/Survey/Fingerprint/e9ac13e0-b57d-4645-af05-fe74968c0bb5?sq=1		2107.0	[1, 2, 3, 4, 5, 6, 7, 8, 9]	01:40:19	129.63.248.19					1	2004	6	0	#NULL!	#NULL!	#NULL!	#NULL!	#NULL!	#NULL!	#NULL!	0	3	3	2	1	4	0	2	0	0	0	0	0	0	0	0	1	2
mcsjt3qxn1h4vtigwv0nrvp1rhmapd71	1	24834159	en	2014/11/24 11:29:55 AM	2014/11/24 11:35:53 AM	California	Firefox	Other		sample-provider=Cint&respondent=4a4748ef-14b2-4714-a33d-ac7f816f5f51	http://s.cint.com/Survey/Fingerprint/4a4748ef-14b2-4714-a33d-ac7f816f5f51?sq=1		2121.0	[1, 2, 3, 4, 5, 6, 7, 8, 9]	00:05:58	173.58.47.188					0	2003	1	0	1	#NULL!	#NULL!	#NULL!	#NULL!	#NULL!	#NULL!	0	4	2	4	2	3	3	4	0	0	2	0	2	0	0	0	2	4
gplgzhaqvz3dmlh6vjn1jxy29hn0fs2d	1	24844187	en	2014/11/24 1:05:29 PM	2014/11/24 1:12:05 PM	United States	Google Chrome	Other		sample-provider=Cint&respondent=97f24d12-da42-4f2d-a62e-2ddc50db9981	http://s.cint.com/Survey/Fingerprint/97f24d12-da42-4f2d-a62e-2ddc50db9981?sq=1		2109.0	[1, 2, 3, 4, 5, 6, 7, 8, 9]	00:06:35	23.117.71.109					0	2007	4	#NULL!	#NULL!	2	#NULL!	#NULL!	#NULL!	#NULL!	#NULL!	0	2	0	0	0	3	1	2	0	0	0	1	3	2	0	2	1	5
4o72gi2f29wycjctm3n0l3kx9c8mmgee	1	24870219	en	2014/11/24 7:19:02 PM	2014/11/24 7:28:22 PM	West Virginia	Google Chrome	Other		sample-provider=Cint&respondent=b2a92bae-2392-4f1f-a672-787287615aef	http://s.cint.com/Survey/Fingerprint/b2a92bae-2392-4f1f-a672-787287615aef?sq=1		2111.0	[1, 2, 3, 4, 5, 6, 7, 8, 9]	00:09:19	71.206.218.113					1	2006	2	0	#NULL!	#NULL!	#NULL!	#NULL!	#NULL!	#NULL!	#NULL!	0	5	3	0	0	3	2	3	0	0	0	0	0	0	0	0	4	5
6j1dw26djxa5lymov1vpelva3xbjom6q	1	24836947	en	2014/11/24 11:54:41 AM	2014/11/24 11:58:21 AM	New York	Google Chrome	Other		sample-provider=Cint&respondent=340de5df-28ee-4dfa-95f7-a24519e434b1	http://s.cint.com/Survey/Fingerprint/340de5df-28ee-4dfa-95f7-a24519e434b1?sq=1		2113.0	[1, 2, 3, 4, 5, 6, 7, 8, 9]	00:03:39	67.246.71.227					0	2006	3	0	#NULL!	#NULL!	#NULL!	#NULL!	#NULL!	#NULL!	#NULL!	0	3	0	0	0	3	0	3	0	0	0	0	0	0	0	0	0	5
f224j6p0s9raltykiee2xwgpk37y7wu1	1	24824915	en	2014/11/24 9:57:36 AM	2014/11/24 10:08:37 AM	Maine	Safari	iPad		sample-provider=Cint&respondent=90107074-5e1e-473f-a311-4e31cad50262	http://s.cint.com/Survey/Fingerprint/90107074-5e1e-473f-a311-4e31cad50262?sq=1		2154.0	[1, 2, 3, 4, 5, 6, 7, 8, 9]	00:11:01	76.178.244.61					0	2005	11	0	#NULL!	#NULL!	#NULL!	#NULL!	#NULL!	#NULL!	#NULL!	0	1	2	0	0	3	3	4	3	1	1	1	3	4	2	2	3	5
hvmfhq48t9domxrf4n1wfovfhu5fr61t	1	24840921	en	2014/11/24 12:28:58 PM	2014/11/24 12:35:45 PM	Utah	Google Chrome	Other		sample-provider=Cint&respondent=58d9632a-573e-4724-b839-dcf537e959a2	http://s.cint.com/Survey/Fingerprint/58d9632a-573e-4724-b839-dcf537e959a2		2119.0	[1, 2, 3, 4, 5, 6, 7, 8, 9]	00:06:46	199.127.70.210					1	2007	5	0	#NULL!	#NULL!	#NULL!	#NULL!	#NULL!	#NULL!	#NULL!	0	5	2	0	0	0	0	0	5	5	0	0	0	0	0	0	2	5
1thkimwx3yh8nye9oc3depzugo58egor	1	24878339	en	2014/11/24 9:07:12 PM	2014/11/24 9:14:18 PM	United States	Firefox	Other		sample-provider=Cint&respondent=e6f21802-260c-48bb-a8a4-25f6766d6534	http://s.cint.com/Survey/Fingerprint/e6f21802-260c-48bb-a8a4-25f6766d6534?sq=1		2100.0	[1, 2, 3, 4, 5, 6, 7, 8, 9]	00:07:06	75.134.228.18					1	2005	1	0	#NULL!	#NULL!	#NULL!	#NULL!	#NULL!	#NULL!	#NULL!	0	3	0	0	0	2	0	2	0	0	0	0	0	0	0	0	2	2
j5igud14judog9d8ghbm5tlfq0e24u6i	1	24833365	en	2014/11/24 11:22:05 AM	2014/11/24 11:28:51 AM	Ohio	Internet Explorer	Other		sample-provider=Cint&respondent=97dda32d-d044-4522-b7fc-d04bb80f9fac	http://s.cint.com/Survey/Fingerprint/97dda32d-d044-4522-b7fc-d04bb80f9fac?sq=1		2094.0	[1, 2, 3, 4, 5, 6, 7, 8, 9]	00:06:18	64.246.108.229					0	2004	7	0	#NULL!	#NULL!	#NULL!	#NULL!	#NULL!	#NULL!	#NULL!	0	3	1	0	0	2	0	0	0	0	0	0	0	0	0	0	0	4
9gu82ws11xftbjekyrsoh24bwcgaieju	1	24874519	en	2014/11/24 8:02:28 PM	2014/11/24 8:06:45 PM	Illinois	Google Chrome	Other		sample-provider=Cint&respondent=a6f55b6f-42cf-4306-81a5-34f1c7e14a2a	http://s.cint.com/Survey/Fingerprint/a6f55b6f-42cf-4306-81a5-34f1c7e14a2a		2153.0	[1, 2, 3, 4, 5, 6, 7, 8, 9]	00:04:17	71.201.196.180					0	2004	8	0	#NULL!	#NULL!	#NULL!	#NULL!	#NULL!	#NULL!	#NULL!	0	4	3	2	2	3	4	3	2	2	2	1	3	0	0	0	2	5
2gnn81grhiekxtpdz08txzr6zpy66n9x	1	24826741	en	2014/11/24 10:17:42 AM	2014/11/24 11:10:47 AM	Nevada	Internet Explorer	Other		sample-provider=Cint&respondent=0273723e-00d1-44e5-aab7-25db90e8342d	http://s.cint.com/Survey/Fingerprint/0273723e-00d1-44e5-aab7-25db90e8342d		2135.0	[1, 2, 3, 4, 5, 6, 7, 8, 9]	00:53:05	72.193.23.168					1	2004	1	0	#NULL!	#NULL!	#NULL!	#NULL!	#NULL!	#NULL!	#NULL!	0	2	2	2	2	2	2	2	0	0	0	0	2	2	2	2	0	3
1z7xo6bj8yjhr38jflsnmuzfvwu9lp2a	1	24859411	en	2014/11/24 4:01:38 PM	2014/11/24 4:04:41 PM	Texas	Firefox	Other		sample-provider=Cint&respondent=08886244-34a7-4528-a244-f114f122f711	http://s.cint.com/Survey/Fingerprint/08886244-34a7-4528-a244-f114f122f711?sq=1		2156.0	[1, 2, 3, 4, 5, 6, 7, 8, 9]	00:03:03	99.106.235.67					0	2007	5	#NULL!	#NULL!	2	#NULL!	#NULL!	#NULL!	#NULL!	#NULL!	0	2	3	1	2	2	3	2	2	1	1	2	3	3	2	2	2	2
c2ajirtc2k6wntmob0v6ooki8rs6o7y8	1	24820411	en	2014/11/24 9:20:53 AM	2014/11/24 9:24:59 AM	United States	Google Chrome	Other		sample-provider=Cint&respondent=f414f7d6-14cd-41c8-bdfe-48a8b48ab9b0	http://s.cint.com/Survey/Fingerprint/f414f7d6-14cd-41c8-bdfe-48a8b48ab9b0		2124.0	[1, 2, 3, 4, 5, 6, 7, 8, 9]	00:04:06	23.121.53.158					1	2003	9	#NULL!	1	#NULL!	#NULL!	#NULL!	#NULL!	#NULL!	#NULL!	0	5	2	5	1	2	0	0	0	0	2	0	2	0	0	0	1	2
yatcjruwbdaho9hxl24o4hsk1huke5q1	1	24850123	en	2014/11/24 2:06:51 PM	2014/11/24 2:10:47 PM	Illinois	Internet Explorer	Other		sample-provider=Cint&respondent=e7919774-e164-45c5-9f2b-086280c3122e	http://s.cint.com/Survey/Fingerprint/e7919774-e164-45c5-9f2b-086280c3122e?sq=1		2145.0	[1, 2, 3, 4, 5, 6, 7, 8, 9]	00:03:56	108.192.125.39					0	2004	11	#NULL!	1	#NULL!	#NULL!	#NULL!	#NULL!	#NULL!	#NULL!	0	3	3	2	1	4	5	5	0	0	5	1	4	4	3	3	2	3
nm3q8xwzu0cdsd7zgz1jem5wkt72rlrw	1	24883439	en	2014/11/24 11:07:23 PM	2014/11/24 11:36:25 PM	United States	Firefox	Other		sample-provider=Cint&respondent=98314eaf-2c4e-4444-a094-a13feeb84a6e	http://s.cint.com/Survey/Fingerprint/98314eaf-2c4e-4444-a094-a13feeb84a6e?sq=1		2129.0	[1, 2, 3, 4, 5, 6, 7, 8, 9]	00:29:02	73.33.128.126					1	2007	8	0	#NULL!	#NULL!	#NULL!	#NULL!	#NULL!	#NULL!	#NULL!	0	3	1	2	1	3	2	3	1	3	2	1	3	1	1	1	4	5
p3vclp5q6adex96d09hp7t4ggtio8mux	1	24868529	en	2014/11/24 6:38:58 PM	2014/11/24 6:43:12 PM	United States	Internet Explorer	Other		sample-provider=Cint&respondent=928ea449-f191-436c-a105-b406a1a60c4d	http://s.cint.com/Survey/Fingerprint/928ea449-f191-436c-a105-b406a1a60c4d		2104.0	[1, 2, 3, 4, 5, 6, 7, 8, 9]	00:04:13	64.12.117.14					1	2003	3	0	#NULL!	#NULL!	3	#NULL!	#NULL!	#NULL!	#NULL!	2	2	1	0	0	2	1	2	0	2	0	0	1	0	0	1	1	4
i0zyglu8mcrouogei31po937xf1p4y96	1	24837693	en	2014/11/24 12:01:47 PM	2014/11/24 12:06:33 PM	Georgia	Google Chrome	Other		sample-provider=Cint&respondent=539a980c-8740-4f70-913e-a77080145de7	http://s.cint.com/Survey/Fingerprint/539a980c-8740-4f70-913e-a77080145de7?sq=1		2121.0	[1, 2, 3, 4, 5, 6, 7, 8, 9]	00:04:45	24.96.126.129					1	2004	2	0	#NULL!	#NULL!	#NULL!	4	#NULL!	#NULL!	#NULL!	0	2	2	0	0	3	0	3	0	0	0	0	0	0	0	0	3	2
ci8r0kggxgdj8lts6u4ev5an08uv5m0k	1	24877651	en	2014/11/24 8:57:27 PM	2014/11/24 9:05:05 PM	United States	Internet Explorer	Other		sample-provider=Cint&respondent=858b622d-50da-4646-b417-c6fc095775f9	http://s.cint.com/Survey/Fingerprint/858b622d-50da-4646-b417-c6fc095775f9?sq=1		2111.0	[1, 2, 3, 4, 5, 6, 7, 8, 9]	00:07:38	73.39.63.141					1	2007	8	0	#NULL!	#NULL!	#NULL!	#NULL!	#NULL!	#NULL!	#NULL!	0	3	3	3	0	1	0	1	0	0	0	0	0	0	0	0	2	3
0ho5a1vvprfv7up0zshn7l6jd4xp2v12	1	24820111	en	2014/11/24 9:16:43 AM	2014/11/24 9:21:15 AM	Washington	Safari	iPad		sample-provider=Cint&respondent=2e3f19d2-c9e7-491a-9844-f02870dfa9ad	http://s.cint.com/Survey/Fingerprint/2e3f19d2-c9e7-491a-9844-f02870dfa9ad		2111.0	[1, 2, 3, 4, 5, 6, 7, 8, 9]	00:04:32	50.53.175.180					0	2005	4	0	#NULL!	#NULL!	#NULL!	#NULL!	#NULL!	#NULL!	#NULL!	0	2	2	0	0	1	0	1	0	0	1	0	0	0	0	0	2	2
7k0pd9cwj9lnhucwpadosfo1psft1ioc	1	24868637	en	2014/11/24 6:41:26 PM	2014/11/24 6:49:48 PM	Florida	Google Chrome	Other		sample-provider=Cint&respondent=9160e8e5-a9af-4431-9874-5742ecfbbc50	http://s.cint.com/Survey/Fingerprint/9160e8e5-a9af-4431-9874-5742ecfbbc50?sq=1		2097.0	[1, 2, 3, 4, 5, 6, 7, 8, 9]	00:08:21	97.97.44.25					0	2005	8	0	#NULL!	#NULL!	#NULL!	#NULL!	#NULL!	#NULL!	#NULL!	0	2	1	0	0	1	0	4	0	0	0	0	0	0	0	0	4	0
k1ulm6rv3yyu430fzpqcr2ux6860mxtd	1	24882549	en	2014/11/24 10:36:00 PM	2014/11/24 10:46:47 PM	United States	Google Chrome	Android		sample-provider=Cint&respondent=b8e7013d-a0a3-4781-b179-f1241b75fc1e	http://s.cint.com/Survey/Fingerprint/b8e7013d-a0a3-4781-b179-f1241b75fc1e?sq=1		2112.0	[1, 2, 3, 4, 5, 6, 7, 8, 9]	00:10:46	32.218.60.29					1	2006	5	0	#NULL!	#NULL!	#NULL!	#NULL!	#NULL!	#NULL!	#NULL!	0	2	2	1	0	2	0	1	0	0	2	1	2	0	0	0	3	3
22k3pqbnn96ltvoyfedixfbua2gldinx	1	24805239	en	2014/11/24 5:21:05 AM	2014/11/24 5:49:03 AM	Texas	Safari	iPad		sample-provider=Cint&respondent=8a436804-b2c8-4bbd-9759-ef618d683a35	http://s.cint.com/Survey/Fingerprint/8a436804-b2c8-4bbd-9759-ef618d683a35		2099.0	[1, 2, 3, 4, 5, 6, 7, 8, 9]	00:27:58	76.227.89.226					0	2004	1	0	#NULL!	#NULL!	#NULL!	#NULL!	#NULL!	#NULL!	#NULL!	0	1	1	0	0	1	2	2	0	0	0	0	0	0	0	0	2	4
ekg11h0xkvi74fb6z1ztvjjl78pju0iq	1	24831167	en	2014/11/24 11:00:24 AM	2014/11/24 12:43:22 PM	Tennessee	Google Chrome	Android		sample-provider=Cint&respondent=f45d6006-72ff-45ff-9831-79b519826ffd	http://s.cint.com/Survey/Fingerprint/f45d6006-72ff-45ff-9831-79b519826ffd		2124.0	[1, 2, 3, 4, 5, 6, 7, 8, 9]	00:04:24	66.87.152.89					1	2003	12	0	#NULL!	#NULL!	#NULL!	#NULL!	#NULL!	#NULL!	#NULL!	0	3	0	0	0	1	2	0	0	0	0	0	0	0	0	0	3	4
zlpm0gcvv49z0wup6czg3mx07ohwe8cm	1	24841673	en	2014/11/24 12:36:27 PM	2014/11/24 12:45:45 PM	United States	Firefox	Other		sample-provider=Cint&respondent=59e7f53f-3c71-44b3-ae8d-5bd1700611b2	http://s.cint.com/Survey/Fingerprint/59e7f53f-3c71-44b3-ae8d-5bd1700611b2?sq=1		2160.0	[1, 2, 3, 4, 5, 6, 7, 8, 9]	00:09:17	104.140.67.36					1	2003	2	0	#NULL!	#NULL!	#NULL!	#NULL!	#NULL!	#NULL!	#NULL!	0	5	5	5	5	5	5	5	3	1	1	5	1	2	3	3	2	3
rdg91iu6efi5xwyzjaqt54kylya2391f	1	24883537	en	2014/11/24 11:11:06 PM	2014/11/25 11:06:29 PM	Kansas	Google Chrome	Other		sample-provider=Cint&respondent=bbf459f7-dd69-4ec1-89ad-4cc9db1d36e6	http://s.cint.com/Survey/Fingerprint/bbf459f7-dd69-4ec1-89ad-4cc9db1d36e6?sq=1		2094.0	[1, 2, 3, 4, 5, 6, 7, 8, 9]	23:55:23	99.13.20.95					0	2007	1	0	#NULL!	#NULL!	#NULL!	#NULL!	#NULL!	#NULL!	#NULL!	0	1	0	0	0	1	0	2	0	0	0	0	0	0	0	0	2	2
dtzpe1fef068qd3kjsv6og38ktcwbu3v	1	24842811	en	2014/11/24 12:49:38 PM	2014/11/24 12:55:22 PM	Oklahoma	Internet Explorer	Other		sample-provider=Cint&respondent=dc400ffc-d30d-4575-8967-cf99cee480e7	http://s.cint.com/Survey/Fingerprint/dc400ffc-d30d-4575-8967-cf99cee480e7?sq=1		2115.0	[1, 2, 3, 4, 5, 6, 7, 8, 9]	00:05:44	63.151.230.164					1	2007	11	#NULL!	1	#NULL!	#NULL!	#NULL!	#NULL!	#NULL!	#NULL!	2	1	1	0	0	1	1	0	0	0	0	0	1	0	0	0	0	4
6p0j9xkxnpl7z0xpm66p9c2jhxdd8fuj	1	24812703	en	2014/11/24 7:21:28 AM	2014/11/24 7:29:28 AM	Illinois	Internet Explorer	Other		sample-provider=Cint&respondent=2a5677da-6cf3-4e21-97c9-485907ec2ec9	http://s.cint.com/Survey/Fingerprint/2a5677da-6cf3-4e21-97c9-485907ec2ec9		2097.0	[1, 2, 3, 4, 5, 6, 7, 8, 9]	00:08:00	108.67.105.138					0	2003	11	0	#NULL!	#NULL!	#NULL!	#NULL!	#NULL!	#NULL!	#NULL!	0	2	2	0	0	1	0	0	0	0	0	0	0	0	0	0	0	4
7j8w4bgw74yhrhy8354olfqzaf99zkpy	1	24858527	en	2014/11/24 3:49:25 PM	2014/11/24 3:56:34 PM	Pennsylvania	Safari	Other		sample-provider=Cint&respondent=b4c01c71-1dae-49ee-93f5-65d891fb0d9b	http://s.cint.com/Survey/Fingerprint/b4c01c71-1dae-49ee-93f5-65d891fb0d9b?sq=1		2160.0	[1, 2, 3, 4, 5, 6, 7, 8, 9]	00:07:08	71.230.57.152					0	2004	12	0	#NULL!	#NULL!	#NULL!	#NULL!	#NULL!	#NULL!	#NULL!	0	5	3	5	2	3	0	3	0	0	4	2	3	5	2	0	2	2
vwapaub2v6ugx8telnkj99ibe2kpurps	1	24866109	en	2014/11/24 5:47:25 PM	2014/11/24 5:53:43 PM	United States	Google Chrome	Other		sample-provider=Cint&respondent=e8d76154-3c4a-413b-836d-006346a373e0	http://s.cint.com/Survey/Fingerprint/e8d76154-3c4a-413b-836d-006346a373e0?sq=1		2183.0	[1, 2, 3, 4, 5, 6, 7, 8, 9]	00:06:18	65.35.34.40					0	2007	10	0	#NULL!	#NULL!	#NULL!	#NULL!	#NULL!	#NULL!	#NULL!	1	5	5	5	5	5	0	5	0	0	5	0	5	5	1	0	0	3
30fpupemary820gobygmef2405za7u61	1	24883407	en	2014/11/24 11:06:07 PM	2014/11/24 11:13:11 PM	South Carolina	Firefox	Other		sample-provider=Cint&respondent=2aa51f26-2723-447a-a75d-ced9ec9b2777	http://s.cint.com/Survey/Fingerprint/2aa51f26-2723-447a-a75d-ced9ec9b2777?sq=1		2111.0	[1, 2, 3, 4, 5, 6, 7, 8, 9]	00:06:47	66.191.189.87					1	2004	2	0	#NULL!	#NULL!	#NULL!	#NULL!	#NULL!	#NULL!	#NULL!	0	5	1	3	0	1	0	2	0	0	2	3	0	0	0	0	2	1
jiklzezbr4z0sqaq04etuccec8fgcc0q	1	24830503	en	2014/11/24 10:54:13 AM	2014/11/24 11:01:46 AM	Oregon	Internet Explorer	Other		sample-provider=Cint&respondent=c9b494ba-ecdb-454c-ac43-c33e17beb763	http://queensu.fluidsurveys.com/surveys/dr-janssen/parental-influence-and-active-play-1/?sample-provider=Cint&respondent=c9b494ba-ecdb-454c-ac43-c33e17beb763		2119.0	[1, 2, 3, 4, 5, 6, 7, 8, 9]	00:07:33	72.160.89.141					1	2003	9	0	#NULL!	#NULL!	#NULL!	#NULL!	#NULL!	#NULL!	#NULL!	0	1	0	0	1	2	4	1	2	2	0	0	1	0	0	0	2	5
19cuyqxjw0uhquxofxwp3lg8qc4s2a0b	1	24836131	en	2014/11/24 11:48:08 AM	2014/11/24 11:54:36 AM	Idaho	Google Chrome	Other		sample-provider=Cint&respondent=a6a79d42-abf0-45dc-a59a-7b3f0a943666	http://s.cint.com/Survey/Fingerprint/a6a79d42-abf0-45dc-a59a-7b3f0a943666?sq=1		2098.0	[1, 2, 3, 4, 5, 6, 7, 8, 9]	00:06:28	71.220.177.38					1	2005	8	0	1	#NULL!	#NULL!	#NULL!	#NULL!	#NULL!	#NULL!	0	3	0	0	0	1	1	3	0	1	0	0	0	0	0	0	0	5
2cbjplv6iafljvr3q3bxe8pct7sucyk7	1	24881355	en	2014/11/24 10:00:02 PM	2014/11/24 10:07:42 PM	New York	Google Chrome	Other		sample-provider=Cint&respondent=66f61979-4477-49a6-819e-d9e2888b7308	http://s.cint.com/Survey/Fingerprint/66f61979-4477-49a6-819e-d9e2888b7308?sq=1		2135.0	[1, 2, 3, 4, 5, 6, 7, 8, 9]	00:07:40	162.243.172.94					0	2005	10	0	#NULL!	#NULL!	#NULL!	#NULL!	#NULL!	#NULL!	#NULL!	0	5	4	0	0	3	1	1	5	0	2	1	3	2	2	2	2	2
2ggr0g4jwwqfuclv2ib65b3g29p7ygrj	1	24846445	en	2014/11/24 1:29:01 PM	2014/11/24 1:32:07 PM	California	Google Chrome	Other		sample-provider=Cint&respondent=b6147b3f-084d-43a6-8a6f-af56d6170c84	http://s.cint.com/Survey/Fingerprint/b6147b3f-084d-43a6-8a6f-af56d6170c84?sq=1		2192.0	[1, 2, 3, 4, 5, 6, 7, 8, 9]	00:03:05	148.87.19.202					1	2007	3	0	#NULL!	#NULL!	#NULL!	#NULL!	#NULL!	#NULL!	#NULL!	0	4	3	4	4	4	4	4	4	3	3	3	4	4	4	4	2	5
vs92orarfc8vdkl24ladjy9guicsh0bf	1	24837017	en	2014/11/24 11:55:20 AM	2014/11/24 11:59:09 AM	Michigan	Google Chrome	Other		sample-provider=Cint&respondent=9dda7be8-5b39-4117-a3cf-dc6af8a6e183	http://s.cint.com/Survey/Fingerprint/9dda7be8-5b39-4117-a3cf-dc6af8a6e183		2146.0	[1, 2, 3, 4, 5, 6, 7, 8, 9]	00:03:47	108.67.99.170					0	2005	1	0	#NULL!	#NULL!	#NULL!	#NULL!	#NULL!	#NULL!	#NULL!	0	4	3	3	2	5	4	3	0	2	3	2	2	0	2	2	2	4
24pu8mq0uz30f6uwhnt2cky2eoyzj4s7	1	24810237	en	2014/11/24 6:46:03 AM	2014/11/24 6:52:33 AM	Pennsylvania	Google Chrome	Other		sample-provider=Cint&respondent=2f589d07-ef2a-4f1f-bab1-84ac28d3cad0	http://s.cint.com/Survey/Fingerprint/2f589d07-ef2a-4f1f-bab1-84ac28d3cad0?sq=1		2132.0	[1, 2, 3, 4, 5, 6, 7, 8, 9]	00:06:29	74.111.162.72					1	2004	8	#NULL!	1	2	#NULL!	#NULL!	#NULL!	#NULL!	#NULL!	0	3	2	3	0	2	1	2	0	0	3	0	1	2	2	0	3	3
myubys73fgkoorg1oafmyx8h5izi5ebq	1	24805729	en	2014/11/24 5:34:05 AM	2014/11/24 5:50:09 AM	New Jersey	Firefox	Other		sample-provider=Cint&respondent=29141c39-d9e4-46a4-a534-affc631e9069	http://s.cint.com/Survey/Fingerprint/29141c39-d9e4-46a4-a534-affc631e9069		2133.0	[1, 2, 3, 4, 5, 6, 7, 8, 9]	00:16:04	64.64.127.76					0	2006	6	0	1	#NULL!	#NULL!	#NULL!	#NULL!	#NULL!	#NULL!	0	5	3	1	0	2	4	1	0	0	3	2	2	1	0	0	2	3
7yizonkdmso3d3kygzu3wuwrvhektml9	1	24824659	en	2014/11/24 9:54:19 AM	2014/11/24 9:56:46 AM	Florida	Firefox	Other		sample-provider=Cint&respondent=a2e42f3d-adb3-4243-a92a-e31b25d484c5	http://s.cint.com/Survey/Fingerprint/a2e42f3d-adb3-4243-a92a-e31b25d484c5?sq=1		2175.0	[1, 2, 3, 4, 5, 6, 7, 8, 9]	00:02:27	67.78.240.173					1	2004	1	0	#NULL!	#NULL!	#NULL!	#NULL!	#NULL!	#NULL!	#NULL!	1	3	3	4	4	3	4	4	3	4	3	3	4	3	4	3	2	2
ssamqb947wos42lyxvyse0v2bq5vte1a	1	24813591	en	2014/11/24 7:39:59 AM	2014/11/24 7:45:28 AM	Pennsylvania	Firefox	Other		sample-provider=Cint&respondent=f2830c4a-f5f3-4a7f-857c-1d98204a94e5	http://s.cint.com/Survey/Fingerprint/f2830c4a-f5f3-4a7f-857c-1d98204a94e5		2097.0	[1, 2, 3, 4, 5, 6, 7, 8, 9]	00:05:27	184.5.176.21					0	2004	2	0	#NULL!	#NULL!	#NULL!	#NULL!	#NULL!	#NULL!	#NULL!	0	5	2	0	0	1	0	2	0	0	0	0	1	0	0	0	0	0
xlm5y93xiyygedy4i8ya9vfriot2dxzj	1	24814803	en	2014/11/24 8:03:37 AM	2014/11/24 8:12:01 AM	Florida	Safari	Android		sample-provider=Cint&respondent=59f3f6c5-1e2c-40aa-a62c-5112203ec59f	http://queensu.fluidsurveys.com/surveys/dr-janssen/parental-influence-and-active-play-1/?sample-provider=Cint&respondent=59f3f6c5-1e2c-40aa-a62c-5112203ec59f		2104.0	[1, 2, 3, 4, 5, 6, 7, 8, 9]	00:08:24	173.209.211.149					0	2003	5	0	#NULL!	#NULL!	#NULL!	#NULL!	#NULL!	#NULL!	#NULL!	0	3	2	0	1	1	0	1	0	0	4	0	2	0	0	1	0	5
e5wbglfdg0averwd2nvd0mzlrfp7shrr	1	24852173	en	2014/11/24 2:33:00 PM	2014/11/24 2:39:32 PM	New Jersey	Google Chrome	Android		sample-provider=Cint&respondent=1bd223ff-eeae-4770-b180-50685be8f761	http://s.cint.com/Survey/Fingerprint/1bd223ff-eeae-4770-b180-50685be8f761?sq=1		2122.0	[1, 2, 3, 4, 5, 6, 7, 8, 9]	00:06:31	108.25.65.191					1	2003	1	0	1	#NULL!	#NULL!	#NULL!	#NULL!	#NULL!	#NULL!	0	4	3	1	0	2	5	2	0	0	2	0	1	0	0	0	1	3
6p5va5ns480aykx982jwj5kj02xdjqfg	1	24827507	en	2014/11/24 10:25:18 AM	2014/11/24 10:31:02 AM	Georgia	Google Chrome	Other		sample-provider=Cint&respondent=3e1b20f4-40c5-4fbd-820d-508a51cc13e5	http://s.cint.com/Survey/Fingerprint/3e1b20f4-40c5-4fbd-820d-508a51cc13e5?sq=1		2131.0	[1, 2, 3, 4, 5, 6, 7, 8, 9]	00:05:44	72.152.208.143					0	2005	12	#NULL!	#NULL!	#NULL!	#NULL!	4	#NULL!	#NULL!	#NULL!	0	2	0	1	0	1	4	1	0	0	0	0	0	0	0	0	2	3
mv5zw2ru5pceprryj8ztn2fmqi1dhbu2	1	24853531	en	2014/11/24 2:47:54 PM	2014/11/24 2:51:35 PM	Missouri	Internet Explorer	Other		sample-provider=Cint&respondent=1ce56f44-4d21-409e-be7e-5e19cb25185b	http://s.cint.com/Survey/Fingerprint/1ce56f44-4d21-409e-be7e-5e19cb25185b?sq=1		2090.0	[1, 2, 3, 4, 5, 6, 7, 8, 9]	00:03:41	63.137.149.224					1	2004	2	0	#NULL!	#NULL!	#NULL!	#NULL!	#NULL!	#NULL!	#NULL!	0	2	0	0	0	2	0	0	0	0	0	0	0	0	0	0	0	5
7bth816pnfn7d1wsbjfpuhxah0xtjyac	1	24851191	en	2014/11/24 2:20:45 PM	2014/11/24 2:25:08 PM	North Carolina	Google Chrome	Other		sample-provider=Cint&respondent=d5e95d1a-fa1b-4b06-a0f1-d285748f863f	http://s.cint.com/Survey/Fingerprint/d5e95d1a-fa1b-4b06-a0f1-d285748f863f		2097.0	[1, 2, 3, 4, 5, 6, 7, 8, 9]	00:04:23	68.189.149.161					0	2005	6	0	#NULL!	#NULL!	#NULL!	#NULL!	#NULL!	#NULL!	#NULL!	0	4	1	0	0	1	1	1	0	0	0	0	0	0	0	0	0	2
kj3a7bjagb7hu1862ibg0eh6uji1uok2	1	24876131	en	2014/11/24 8:35:04 PM	2014/11/24 8:39:54 PM	Pennsylvania	Firefox	Other		sample-provider=Cint&respondent=7de04f7e-d402-49d0-873f-ed96282f412d	http://s.cint.com/Survey/Fingerprint/7de04f7e-d402-49d0-873f-ed96282f412d?sq=1		2102.0	[1, 2, 3, 4, 5, 6, 7, 8, 9]	00:04:48	70.15.172.134					0	2003	11	0	#NULL!	#NULL!	#NULL!	#NULL!	#NULL!	#NULL!	#NULL!	0	4	0	0	0	1	0	4	0	0	0	0	0	0	0	0	4	1
bdotdrjer5uxjeo6370almk81imvbbjh	1	24847657	en	2014/11/24 1:42:38 PM	2014/11/24 1:51:01 PM	California	Google Chrome	Android		sample-provider=Cint&respondent=9e1552e4-3307-4ab1-9d2d-6f3b2aa56ed5	http://s.cint.com/Survey/Fingerprint/9e1552e4-3307-4ab1-9d2d-6f3b2aa56ed5?sq=1		2137.0	[1, 2, 3, 4, 5, 6, 7, 8, 9]	00:08:22	108.194.146.96					0	2006	1	#NULL!	#NULL!	2	#NULL!	#NULL!	#NULL!	#NULL!	#NULL!	1	5	2	1	0	2	2	1	1	0	1	3	2	3	4	4	3	2
4s9dagwhgnml8q07y6d593sscrpsetvw	1	24826775	en	2014/11/24 10:18:06 AM	2014/11/24 10:29:12 AM	Missouri	Safari	iPhone/iPod		sample-provider=Cint&respondent=913a5082-fff6-4d97-a7b0-1dc6a208786b	http://s.cint.com/Survey/Fingerprint/913a5082-fff6-4d97-a7b0-1dc6a208786b?sq=1		2131.0	[1, 2, 3, 4, 5, 6, 7, 8, 9]	00:11:06	99.27.120.171					0	2006	1	0	#NULL!	#NULL!	#NULL!	#NULL!	#NULL!	#NULL!	#NULL!	0	3	2	1	1	2	3	2	3	2	0	0	1	0	0	0	2	3
i4h8jqrwca0l45z9bg138y745zomd89m	1	24814937	en	2014/11/24 8:06:26 AM	2014/11/24 8:13:35 AM	Louisiana	Google Chrome	Android		sample-provider=Cint&respondent=8ab3a188-affe-4522-9a21-99d568df5c0e	http://s.cint.com/Survey/Fingerprint/8ab3a188-affe-4522-9a21-99d568df5c0e?sq=1		2104.0	[1, 2, 3, 4, 5, 6, 7, 8, 9]	00:07:09	99.21.205.22					1	2007	1	#NULL!	1	2	#NULL!	#NULL!	#NULL!	#NULL!	#NULL!	0	5	1	0	0	1	1	3	0	0	0	0	0	0	0	0	3	5
c8x78smngdix43dsrm80dvafh5be388n	1	24843813	en	2014/11/24 1:00:27 PM	2014/11/24 1:13:30 PM	Michigan	Internet Explorer	Other		sample-provider=Cint&respondent=e00b04dd-20f3-4ee2-abd8-61b9d2287938	http://s.cint.com/Survey/Fingerprint/e00b04dd-20f3-4ee2-abd8-61b9d2287938?sq=1		2147.0	[1, 2, 3, 4, 5, 6, 7, 8, 9]	00:13:01	71.238.155.234					1	2007	8	#NULL!	#NULL!	2	#NULL!	#NULL!	#NULL!	#NULL!	#NULL!	1	4	2	0	2	2	4	2	4	4	1	3	2	1	2	1	3	4
49oy6dvkb4xb5ue2y54a5j62cif0gtgq	1	24823047	en	2014/11/24 9:49:12 AM	2014/11/24 9:52:47 AM	Minnesota	Google Chrome	Other		sample-provider=Cint&respondent=a2470c72-6866-4467-9e2d-a0152569cb55	http://s.cint.com/Survey/Fingerprint/a2470c72-6866-4467-9e2d-a0152569cb55?sq=1		2147.0	[1, 2, 3, 4, 5, 6, 7, 8, 9]	00:03:35	74.42.129.41					0	2006	8	0	#NULL!	#NULL!	#NULL!	#NULL!	#NULL!	#NULL!	#NULL!	1	3	2	0	2	4	4	3	4	4	1	2	2	2	0	0	2	3
4gqbsxo17adb14p6tpzl4wwzqa7i5tbo	1	24826863	en	2014/11/24 10:19:08 AM	2014/11/24 10:25:52 AM	United States	Google Chrome	Other		sample-provider=Cint&respondent=1204225b-6f46-46d7-a439-118c1d8f57b8	http://s.cint.com/Survey/Fingerprint/1204225b-6f46-46d7-a439-118c1d8f57b8		2108.0	[1, 2, 3, 4, 5, 6, 7, 8, 9]	00:06:43	97.84.247.16					1	2007	10	0	#NULL!	#NULL!	#NULL!	#NULL!	#NULL!	#NULL!	#NULL!	0	3	2	1	0	1	1	2	0	0	3	0	0	0	0	0	2	2
eouzlig7fh2bs72wbqldyf484r9wl0ed	1	24835959	en	2014/11/24 11:46:43 AM	2014/11/24 11:52:57 AM	Louisiana	Google Chrome	Android		sample-provider=Cint&respondent=b3a58909-79a4-4c9d-85c8-73e0b81eb8b0	http://s.cint.com/Survey/Fingerprint/b3a58909-79a4-4c9d-85c8-73e0b81eb8b0?sq=1		2142.0	[1, 2, 3, 4, 5, 6, 7, 8, 9]	00:05:49	70.196.133.160					1	2003	12	#NULL!	#NULL!	#NULL!	#NULL!	4	#NULL!	#NULL!	#NULL!	0	2	0	0	0	1	2	1	2	1	2	2	3	0	1	2	5	1
x71a5xwxm5h4m3ska16zf7cm08gyxuy5	1	24829509	en	2014/11/24 10:45:29 AM	2014/11/24 10:50:11 AM	United States	Firefox	Other		sample-provider=Cint&respondent=ec6ac2a2-52f4-4a66-ace2-bf884379b83c	http://s.cint.com/Survey/Fingerprint/ec6ac2a2-52f4-4a66-ace2-bf884379b83c?sq=1		2103.0	[1, 2, 3, 4, 5, 6, 7, 8, 9]	00:04:42	40.132.220.246					1	2005	2	0	#NULL!	#NULL!	#NULL!	#NULL!	#NULL!	#NULL!	#NULL!	0	1	0	0	0	2	0	2	0	0	0	2	1	0	0	0	3	2
qifqvxje2x46ofj7a5eeumxkagncicfo	1	24824555	en	2014/11/24 9:52:56 AM	2014/11/24 2:51:19 PM	United States	Safari	iPhone/iPod		sample-provider=Cint&respondent=c5a31ca0-0d54-4862-9372-5a08b7ec752f	http://s.cint.com/Survey/Fingerprint/c5a31ca0-0d54-4862-9372-5a08b7ec752f?sq=1		2097.0	[1, 2, 3, 4, 5, 6, 7, 8, 9]	01:28:42	107.145.4.62					1	2007	4	#NULL!	#NULL!	#NULL!	#NULL!	#NULL!	#NULL!	#NULL!	7	1	3	0	0	0	0	0	0	0	0	0	0	0	0	0	0	0	0
h83u9zwdw5w18cpc8q4qihc5g2jmy8bu	1	24880525	en	2014/11/24 9:39:38 PM	2014/11/24 9:45:39 PM	Colorado	Google Chrome	Other		sample-provider=Cint&respondent=c61fabf9-284d-461a-a1ea-5b395978bc00	http://s.cint.com/Survey/Fingerprint/c61fabf9-284d-461a-a1ea-5b395978bc00?sq=1		2119.0	[1, 2, 3, 4, 5, 6, 7, 8, 9]	00:06:00	69.35.184.190					1	2006	7	0	#NULL!	#NULL!	#NULL!	#NULL!	#NULL!	#NULL!	#NULL!	0	2	1	0	0	1	0	2	0	1	2	0	1	2	1	2	0	3
z6r1g0c4pugnjxjvwcr8ygzce8p5m80u	1	24857297	en	2014/11/24 3:31:47 PM	2014/11/24 3:38:03 PM	Texas	Google Chrome	Android		sample-provider=Cint&respondent=eefcd091-a8df-46f8-9f4b-5552f09396e0	http://s.cint.com/Survey/Fingerprint/eefcd091-a8df-46f8-9f4b-5552f09396e0?sq=1		2108.0	[1, 2, 3, 4, 5, 6, 7, 8, 9]	00:06:15	69.171.166.112					1	2004	2	#NULL!	1	#NULL!	#NULL!	#NULL!	#NULL!	#NULL!	#NULL!	0	2	0	0	0	2	5	2	0	0	0	0	0	0	0	0	2	5
husrhfhv0gkk3kedj3qyk6zcfdst80xy	1	24871027	en	2014/11/24 7:32:00 PM	2014/11/24 7:36:48 PM	Nevada	Google Chrome	Other		sample-provider=Cint&respondent=5349332e-f333-4a12-a483-7eb485816587	http://s.cint.com/Survey/Fingerprint/5349332e-f333-4a12-a483-7eb485816587?sq=1		2205.0	[1, 2, 3, 4, 5, 6, 7, 8, 9]	00:04:47	72.46.137.228					1	2004	3	0	#NULL!	#NULL!	#NULL!	#NULL!	#NULL!	#NULL!	#NULL!	2	5	4	4	5	4	5	4	4	5	4	5	4	5	4	5	4	5
s1pzzfb9jy8i6fhyh7x7j02vfubi50t7	1	24846609	en	2014/11/24 1:30:27 PM	2014/11/24 1:36:37 PM	California	Firefox	Other		sample-provider=Cint&respondent=5ab946fb-7ba7-40e5-be7a-de5ec27bb34d	http://s.cint.com/Survey/Fingerprint/5ab946fb-7ba7-40e5-be7a-de5ec27bb34d?sq=1		2215.0	[1, 2, 3, 4, 5, 6, 7, 8, 9]	00:06:09	198.55.103.112					1	2004	3	#NULL!	1	#NULL!	#NULL!	#NULL!	#NULL!	#NULL!	#NULL!	1	5	5	4	5	4	5	5	5	4	4	5	5	4	4	5	5	5
fhik2qlzo6eozkmom8w2zg9br2e9y1gp	1	24861923	en	2014/11/24 4:35:54 PM	2014/11/24 5:05:19 PM	United States	Google Chrome	Other		sample-provider=Cint&respondent=c14d7651-588c-4bea-a822-d0a3230c068a	http://s.cint.com/Survey/Fingerprint/c14d7651-588c-4bea-a822-d0a3230c068a?sq=1		2144.0	[1, 2, 3, 4, 5, 6, 7, 8, 9]	00:29:25	104.50.186.206					1	2006	5	#NULL!	#NULL!	2	#NULL!	#NULL!	#NULL!	#NULL!	#NULL!	0	2	2	0	0	0	0	2	0	0	2	0	0	0	0	0	2	5
r5b38hrgemh3y2h1ufzdfh30i5e76oef	1	24877165	en	2014/11/24 8:50:52 PM	2014/11/24 8:56:55 PM	Virginia	Google Chrome	Other		sample-provider=Cint&respondent=8686830f-b67e-41c4-8af2-9c712a7ac6a4	http://s.cint.com/Survey/Fingerprint/8686830f-b67e-41c4-8af2-9c712a7ac6a4?sq=1		2152.0	[1, 2, 3, 4, 5, 6, 7, 8, 9]	00:06:02	173.53.3.220					0	2005	7	0	#NULL!	#NULL!	#NULL!	#NULL!	#NULL!	#NULL!	#NULL!	0	5	2	4	0	2	0	3	0	0	3	0	0	0	0	0	2	5
zbdg0zex3lu44hsqvq9i65ffocabdbny	1	24842137	en	2014/11/24 12:42:04 PM	2014/11/24 12:47:18 PM	Illinois	Google Chrome	Other		sample-provider=Cint&respondent=10e84ba8-0638-4342-92ba-338ed5289c0d	http://s.cint.com/Survey/Fingerprint/10e84ba8-0638-4342-92ba-338ed5289c0d		2201.0	[1, 2, 3, 4, 5, 6, 7, 8, 9]	00:05:12	24.100.120.175					1	2003	11	0	#NULL!	#NULL!	#NULL!	#NULL!	#NULL!	#NULL!	#NULL!	0	5	4	3	3	4	5	4	3	5	4	5	3	3	4	4	3	5
foh0vvyyekm252tlmqwd8uq2uxyxi78t	1	24866415	en	2014/11/24 5:53:07 PM	2014/11/24 6:00:31 PM	Pennsylvania	Safari	Android		sample-provider=Cint&respondent=14884c3b-6b90-4737-9e8e-35eafc43f9e3	http://s.cint.com/Survey/Fingerprint/14884c3b-6b90-4737-9e8e-35eafc43f9e3?sq=1		2158.0	[1, 2, 3, 4, 5, 6, 7, 8, 9]	00:07:23	24.239.247.108					1	2006	10	0	#NULL!	#NULL!	#NULL!	#NULL!	#NULL!	#NULL!	#NULL!	1	5	3	1	2	3	3	3	2	2	3	2	5	3	1	3	2	3
kbm9ee3rt0mpqxv0fax4w91o3r0ks1sc	1	24818947	en	2014/11/24 9:10:42 AM	2014/11/24 9:15:44 AM	Minnesota	Google Chrome	Other		sample-provider=Cint&respondent=dba8faf0-c650-4f48-8c2c-0b58b42e4686	http://s.cint.com/Survey/Fingerprint/dba8faf0-c650-4f48-8c2c-0b58b42e4686		2136.0	[1, 2, 3, 4, 5, 6, 7, 8, 9]	00:05:01	72.21.231.238					1	2004	11	#NULL!	1	#NULL!	#NULL!	#NULL!	#NULL!	#NULL!	#NULL!	1	3	1	1	0	3	2	2	0	3	1	1	2	1	0	0	2	3
tenmofb8xz5nzujqxenuarjqp0lad9la	1	24887339	en	2014/11/25 12:35:02 AM	2014/11/25 12:44:12 AM	United States	Google Chrome	Android		sample-provider=Cint&respondent=06fc9e48-1a5c-47c5-b7d1-40926da0d758	http://s.cint.com/Survey/Fingerprint/06fc9e48-1a5c-47c5-b7d1-40926da0d758?sq=1		2125.0	[1, 2, 3, 4, 5, 6, 7, 8, 9]	00:09:10	174.135.26.48					0	2007	1	0	#NULL!	#NULL!	#NULL!	#NULL!	#NULL!	#NULL!	#NULL!	1	5	3	0	0	2	0	3	0	0	3	1	4	0	0	0	2	5
kvclw3inult5kuaaj1g7iogkfy08sqds	1	24857865	en	2014/11/24 3:40:21 PM	2014/11/24 3:50:49 PM	Illinois	Safari	Other		sample-provider=Cint&respondent=e86a1329-3dc3-4398-8f83-3584522fe536	http://s.cint.com/Survey/Fingerprint/e86a1329-3dc3-4398-8f83-3584522fe536		2136.0	[1, 2, 3, 4, 5, 6, 7, 8, 9]	00:10:28	98.253.171.190					1	2007	2	#NULL!	#NULL!	2	#NULL!	#NULL!	#NULL!	#NULL!	#NULL!	0	4	1	0	0	2	5	1	5	5	1	1	4	4	2	1	0	2
kp2l3kfkpfzdbncgoku9eemx5d82rudz	1	24884307	en	2014/11/24 11:43:52 PM	2014/11/24 11:52:25 PM	Texas	Safari	iPhone/iPod		sample-provider=Cint&respondent=5f2faf3d-9168-4f03-8e4f-9324545662a0	http://s.cint.com/Survey/Fingerprint/5f2faf3d-9168-4f03-8e4f-9324545662a0?sq=1		2141.0	[1, 2, 3, 4, 5, 6, 7, 8, 9]	00:06:35	99.37.204.165					1	2006	2	#NULL!	#NULL!	2	#NULL!	#NULL!	#NULL!	#NULL!	#NULL!	0	5	1	2	0	2	2	0	1	1	2	3	3	0	0	3	4	5
tu2rt8po4spfr4d75xg5ihiopieflnmm	1	24857387	en	2014/11/24 3:33:22 PM	2014/11/24 3:43:13 PM	Utah	Google Chrome	Other		sample-provider=Cint&respondent=515c7423-30a3-4da7-bea2-0f944abf97a1	http://s.cint.com/Survey/Fingerprint/515c7423-30a3-4da7-bea2-0f944abf97a1		2145.0	[1, 2, 3, 4, 5, 6, 7, 8, 9]	00:09:50	67.2.200.35					1	2003	11	0	1	#NULL!	#NULL!	#NULL!	#NULL!	#NULL!	#NULL!	0	3	3	1	1	4	1	4	0	0	3	0	3	1	0	0	2	3
vmuay6755bjsm8hwengg69j8yqcku1ll	1	24816959	en	2014/11/24 8:43:41 AM	2014/11/24 8:49:20 AM	Illinois	Firefox	Other		sample-provider=Cint&respondent=0c11353d-5d50-44e0-87ad-654de34ca71f	http://s.cint.com/Survey/Fingerprint/0c11353d-5d50-44e0-87ad-654de34ca71f?sq=1		2096.0	[1, 2, 3, 4, 5, 6, 7, 8, 9]	00:05:39	24.13.72.92					1	2003	1	0	#NULL!	#NULL!	#NULL!	#NULL!	#NULL!	#NULL!	#NULL!	0	4	3	0	0	1	0	0	2	2	2	0	0	0	0	0	0	5
gwgd2hkmb9vfym0hks68h3767wiyrxv2	1	24816489	en	2014/11/24 8:34:42 AM	2014/11/24 8:42:40 AM	Florida	Google Chrome	Android		sample-provider=Cint&respondent=0c6a29c7-e153-4c84-9f6a-8f63e742a334	http://s.cint.com/Survey/Fingerprint/0c6a29c7-e153-4c84-9f6a-8f63e742a334?sq=1		2105.0	[1, 2, 3, 4, 5, 6, 7, 8, 9]	00:07:58	173.209.211.243					0	2003	3	0	#NULL!	#NULL!	#NULL!	#NULL!	#NULL!	#NULL!	#NULL!	0	5	0	0	0	2	0	3	0	0	4	0	0	0	0	0	3	5
gfsbq8u660arcojt47q6oboawnplbcrz	1	24869987	en	2014/11/24 7:13:02 PM	2014/11/24 7:22:04 PM	South Carolina	Safari	Other		sample-provider=Cint&respondent=ec57b0f9-caa4-4286-b0a4-e10dc8f9d7e7	http://s.cint.com/Survey/Fingerprint/ec57b0f9-caa4-4286-b0a4-e10dc8f9d7e7?sq=1		2118.0	[1, 2, 3, 4, 5, 6, 7, 8, 9]	00:09:01	71.85.13.71					1	2007	2	0	1	#NULL!	#NULL!	#NULL!	#NULL!	#NULL!	#NULL!	0	5	2	0	0	2	1	1	0	0	2	0	2	1	0	0	2	3
zegllcnvgujtjd7ijftgqkzledra4p13	1	24848975	en	2014/11/24 1:54:45 PM	2014/11/24 2:00:11 PM	Illinois	Internet Explorer	Other		sample-provider=Cint&respondent=e621de29-6648-4eb1-bb91-70de156889e7	http://s.cint.com/Survey/Fingerprint/e621de29-6648-4eb1-bb91-70de156889e7		2118.0	[1, 2, 3, 4, 5, 6, 7, 8, 9]	00:05:25	99.90.8.71					1	2007	3	0	#NULL!	#NULL!	#NULL!	#NULL!	#NULL!	#NULL!	#NULL!	0	2	1	2	0	1	0	1	0	0	3	0	1	0	0	0	2	3
lixfqytlvokj754ke7vc7m4ye6vu2zci	1	24866303	en	2014/11/24 5:50:57 PM	2014/11/24 6:07:23 PM	Washington	Internet Explorer	Other		sample-provider=Cint&respondent=fe67f27c-ec6f-42f8-8803-6c90d1e02b42	http://s.cint.com/Survey/Fingerprint/fe67f27c-ec6f-42f8-8803-6c90d1e02b42		2166.0	[1, 2, 3, 4, 5, 6, 7, 8, 9]	00:16:26	71.227.182.113					0	2004	4	0	#NULL!	#NULL!	#NULL!	#NULL!	#NULL!	#NULL!	#NULL!	2	3	3	2	2	3	3	3	3	3	3	2	2	3	3	2	3	5
rmub639dzesd9mmgyma8423478yaq3x6	1	24832319	en	2014/11/24 11:11:14 AM	2014/11/24 11:14:33 AM	Virginia	Google Chrome	Android		sample-provider=Cint&respondent=3f050599-901c-4dba-a75d-5836aa07eeed	http://s.cint.com/Survey/Fingerprint/3f050599-901c-4dba-a75d-5836aa07eeed?sq=1		2092.0	[1, 2, 3, 4, 5, 6, 7, 8, 9]	00:03:19	67.172.205.177					0	2003	1	0	#NULL!	#NULL!	#NULL!	#NULL!	#NULL!	#NULL!	#NULL!	0	3	0	0	0	2	2	0	5	5	0	0	2	0	0	0	0	2
bicgeui726d9ewbt1765y47bqmfqvh9c	1	24878739	en	2014/11/24 9:13:08 PM	2014/11/24 9:31:33 PM	North Carolina	Google Chrome	Android		sample-provider=Cint&respondent=be8d96a5-0b36-4550-9df1-b091bc720dc6	http://s.cint.com/Survey/Fingerprint/be8d96a5-0b36-4550-9df1-b091bc720dc6?sq=1		2104.0	[1, 2, 3, 4, 5, 6, 7, 8, 9]	00:18:25	71.28.72.6					1	2003	2	#NULL!	#NULL!	2	#NULL!	#NULL!	#NULL!	#NULL!	#NULL!	0	2	0	0	0	1	0	1	0	0	1	0	0	0	0	0	4	3
94wdh3r4cmwcd7lwh02omicoieq3pmw6	1	24812989	en	2014/11/24 7:27:32 AM	2014/11/24 7:34:44 AM	New York	Firefox	Other		sample-provider=Cint&respondent=aebdd71e-8345-4798-b12c-3db3cf58fe34	http://s.cint.com/Survey/Fingerprint/aebdd71e-8345-4798-b12c-3db3cf58fe34?sq=1		2116.0	[1, 2, 3, 4, 5, 6, 7, 8, 9]	00:07:12	142.255.57.136					1	2007	3	#NULL!	1	#NULL!	#NULL!	#NULL!	#NULL!	#NULL!	#NULL!	0	0	1	0	0	1	4	0	4	4	1	1	1	2	2	1	0	3
bxv8jkjll2vjw23buld3iv2g4k3ghkyl	1	24880811	en	2014/11/24 9:43:42 PM	2014/11/24 9:50:06 PM	Pennsylvania	Google Chrome	Other		sample-provider=Cint&respondent=8730c529-f5c9-4a15-aece-3b482ecda627	http://s.cint.com/Survey/Fingerprint/8730c529-f5c9-4a15-aece-3b482ecda627?sq=1		2104.0	[1, 2, 3, 4, 5, 6, 7, 8, 9]	00:06:24	71.58.16.10					1	2006	7	0	#NULL!	#NULL!	#NULL!	#NULL!	#NULL!	#NULL!	#NULL!	0	2	1	2	0	1	1	0	0	0	2	0	0	0	0	0	0	2
i7718s2qofqiw7c8i1uikdpnncwan7w3	1	24812929	en	2014/11/24 7:26:07 AM	2014/11/24 7:31:29 AM	Virginia	Google Chrome	Other		sample-provider=Cint&respondent=608b0037-249e-414d-b7f9-4255caf00944	http://s.cint.com/Survey/Fingerprint/608b0037-249e-414d-b7f9-4255caf00944?sq=1		2103.0	[1, 2, 3, 4, 5, 6, 7, 8, 9]	00:05:21	173.66.241.140					1	2005	1	0	1	#NULL!	#NULL!	#NULL!	#NULL!	#NULL!	#NULL!	0	2	0	0	0	2	0	0	0	0	0	1	1	0	1	1	0	2
djawitx6usab03htk3xm2ax3mzrzyu33	1	24845619	en	2014/11/24 1:23:15 PM	2014/11/24 2:31:59 PM	California	Google Chrome	Other		sample-provider=Cint&respondent=eee3bcd8-098a-42d2-b827-f1058fc8e1cd	http://s.cint.com/Survey/Fingerprint/eee3bcd8-098a-42d2-b827-f1058fc8e1cd?sq=1		2119.0	[1, 2, 3, 4, 5, 6, 7, 8, 9]	01:08:43	108.247.86.49					0	2003	5	0	#NULL!	#NULL!	#NULL!	#NULL!	#NULL!	#NULL!	#NULL!	0	3	2	0	1	2	2	2	0	0	1	0	2	2	0	0	2	5
zndb6wtrueahi8ett92ign3cog3g40e0	1	24848111	en	2014/11/24 1:47:06 PM	2014/11/24 1:57:47 PM	South Carolina	Firefox	Other		sample-provider=Cint&respondent=76565d58-843b-44d1-970c-2a7e1cc7c031	http://s.cint.com/Survey/Fingerprint/76565d58-843b-44d1-970c-2a7e1cc7c031?sq=1		2151.0	[1, 2, 3, 4, 5, 6, 7, 8, 9]	00:10:39	74.243.224.177					0	2003	12	0	#NULL!	#NULL!	#NULL!	#NULL!	#NULL!	#NULL!	#NULL!	0	4	4	2	0	1	1	1	5	5	5	0	1	0	1	1	0	5
4a7pdhitmicv2gnowev4gytaml4j8l4m	1	24836345	en	2014/11/24 11:49:45 AM	2014/11/24 11:53:55 AM	Colorado	Firefox	Other		sample-provider=Cint&respondent=dde66a7d-c157-448f-a49b-c4a3780b9bbe	http://s.cint.com/Survey/Fingerprint/dde66a7d-c157-448f-a49b-c4a3780b9bbe?sq=1		2135.0	[1, 2, 3, 4, 5, 6, 7, 8, 9]	00:04:10	50.155.232.208					0	2005	11	0	#NULL!	#NULL!	#NULL!	#NULL!	#NULL!	#NULL!	#NULL!	0	3	3	3	1	1	1	4	0	0	3	0	0	0	0	0	3	4
y7ya79810ord8z0f7w0ybte3bnseksrw	1	24839629	en	2014/11/24 12:17:53 PM	2014/11/24 12:22:48 PM	Indiana	Safari	iPad		sample-provider=Cint&respondent=21ee5183-421e-4cd0-8a45-49cd4debefbe	http://s.cint.com/Survey/Fingerprint/21ee5183-421e-4cd0-8a45-49cd4debefbe?sq=1		2114.0	[1, 2, 3, 4, 5, 6, 7, 8, 9]	00:04:53	108.223.78.209					0	2005	7	0	#NULL!	2	#NULL!	#NULL!	#NULL!	#NULL!	#NULL!	0	5	2	1	0	0	0	0	0	0	0	0	0	0	0	0	1	2
051qgko6t727r2tiulqp38fuxcilwq8p	1	24831697	en	2014/11/24 11:05:32 AM	2014/11/24 11:09:34 AM	South Carolina	Google Chrome	Other		sample-provider=Cint&respondent=24df12f2-b794-4d77-b20d-7510c4b7f4c9	http://s.cint.com/Survey/Fingerprint/24df12f2-b794-4d77-b20d-7510c4b7f4c9?sq=1		2109.0	[1, 2, 3, 4, 5, 6, 7, 8, 9]	00:04:02	72.28.226.146					1	2007	2	0	#NULL!	#NULL!	#NULL!	#NULL!	#NULL!	#NULL!	#NULL!	0	5	2	0	0	1	5	0	0	0	0	0	2	2	1	0	0	2
7w47a627f2n9sf339y8ag97ksiaqv4tj	1	24843525	en	2014/11/24 12:56:52 PM	2014/11/24 1:02:17 PM	Missouri	Google Chrome	Other		sample-provider=Cint&respondent=6b5bf338-07a4-4630-9880-eb8d08e6c9d4	http://s.cint.com/Survey/Fingerprint/6b5bf338-07a4-4630-9880-eb8d08e6c9d4		2120.0	[1, 2, 3, 4, 5, 6, 7, 8, 9]	00:05:24	63.137.145.225					1	2006	5	0	#NULL!	#NULL!	#NULL!	#NULL!	#NULL!	#NULL!	#NULL!	0	3	0	3	0	2	0	0	5	2	0	0	3	0	0	0	0	4
q7az4uhunqe4vui71vuj81181s4ae90e	1	24848657	en	2014/11/24 1:52:17 PM	2014/11/24 2:02:07 PM	California	Internet Explorer	Other		sample-provider=Cint&respondent=3aa8fa4e-4abf-485a-bb38-a617e305bb79	http://s.cint.com/Survey/Fingerprint/3aa8fa4e-4abf-485a-bb38-a617e305bb79		2125.0	[1, 2, 3, 4, 5, 6, 7, 8, 9]	00:09:50	96.236.70.86					0	2003	10	0	1	#NULL!	#NULL!	#NULL!	#NULL!	6	#NULL!	0	2	0	2	0	2	4	1	0	0	0	0	0	0	0	0	0	4
ohhzqckpaniidvol3nj2lzlrencnbezj	1	24813965	en	2014/11/24 7:47:05 AM	2014/11/24 7:52:07 AM	Minnesota	Google Chrome	Other		sample-provider=Cint&respondent=7d77dace-50e9-4067-aabc-e2dc11610b6a	http://s.cint.com/Survey/Fingerprint/7d77dace-50e9-4067-aabc-e2dc11610b6a		2138.0	[1, 2, 3, 4, 5, 6, 7, 8, 9]	00:05:02	69.24.176.204					0	2006	1	0	#NULL!	#NULL!	#NULL!	#NULL!	#NULL!	#NULL!	#NULL!	0	5	1	3	0	2	2	4	2	3	0	4	3	0	0	0	2	3
uaqvsskom2r3aww1kr61bon55kp3olhx	1	24879855	en	2014/11/24 9:30:06 PM	2014/11/24 9:35:42 PM	Pennsylvania	Google Chrome	Other		sample-provider=Cint&respondent=e4a53543-0d9b-4d0b-accd-7d48482d3aee	http://s.cint.com/Survey/Fingerprint/e4a53543-0d9b-4d0b-accd-7d48482d3aee?sq=1		2188.0	[1, 2, 3, 4, 5, 6, 7, 8, 9]	00:05:27	174.54.97.212					1	2004	2	0	#NULL!	#NULL!	#NULL!	#NULL!	#NULL!	#NULL!	#NULL!	2	5	4	3	3	5	4	4	4	3	2	3	5	5	3	1	5	4
4pn74l61jcxpsb0m08v065e6wfe2kntn	1	24824729	en	2014/11/24 9:55:19 AM	2014/11/24 10:12:30 AM	United States	Internet Explorer	Other		sample-provider=Cint&respondent=112caf57-688c-41e9-9544-8add09610486	http://s.cint.com/Survey/Fingerprint/112caf57-688c-41e9-9544-8add09610486?sq=1		2133.0	[1, 2, 3, 4, 5, 6, 7, 8, 9]	00:17:11	50.44.249.242					0	2004	6	0	#NULL!	2	3	#NULL!	#NULL!	#NULL!	#NULL!	0	5	5	5	0	0	0	5	0	0	5	1	0	0	0	0	3	4
do7hlrnwxgv3vq39jhw1xbbyi8flcn44	1	24829797	en	2014/11/24 10:48:37 AM	2014/11/24 10:50:59 AM	California	Internet Explorer	Other		sample-provider=Cint&respondent=59deb7ed-27a6-471c-afd0-35b8c63ecbf0	http://s.cint.com/Survey/Fingerprint/59deb7ed-27a6-471c-afd0-35b8c63ecbf0?sq=1		2202.0	[1, 2, 3, 4, 5, 6, 7, 8, 9]	00:02:21	76.233.196.96					1	2006	6	#NULL!	#NULL!	#NULL!	#NULL!	4	#NULL!	#NULL!	#NULL!	0	5	4	4	5	5	5	4	3	3	4	4	5	4	5	4	4	5
d4birqmq2tkpdmim6mewp3oaxbbez8q5	1	24837041	en	2014/11/24 11:55:35 AM	2014/11/24 12:01:36 PM	Virginia	Internet Explorer	Other		sample-provider=Cint&respondent=5681b2b7-ce49-4e98-a19d-5651947c93cd	http://s.cint.com/Survey/Fingerprint/5681b2b7-ce49-4e98-a19d-5651947c93cd?sq=1		2154.0	[1, 2, 3, 4, 5, 6, 7, 8, 9]	00:06:01	70.160.108.3					0	2003	10	0	#NULL!	#NULL!	#NULL!	#NULL!	#NULL!	#NULL!	#NULL!	0	5	5	5	3	3	3	2	0	0	4	3	3	2	1	2	2	2
u0ng625lk2t74ro626jr8jtji220fmvi	1	24844199	en	2014/11/24 1:05:35 PM	2014/11/24 1:09:10 PM	Illinois	Google Chrome	Other		sample-provider=Cint&respondent=bcefbdc7-6356-4a97-8319-8206307686ed	http://s.cint.com/Survey/Fingerprint/bcefbdc7-6356-4a97-8319-8206307686ed		2141.0	[1, 2, 3, 4, 5, 6, 7, 8, 9]	00:03:35	12.175.7.98					1	2007	1	0	#NULL!	#NULL!	#NULL!	#NULL!	#NULL!	#NULL!	#NULL!	0	4	3	0	0	3	3	3	0	0	3	0	2	0	0	0	3	5
jiq6o8m1wg1entyznudkm194gn2zsrck	1	24836903	en	2014/11/24 11:54:13 AM	2014/11/24 12:01:59 PM	North Carolina	Safari	Android		sample-provider=Cint&respondent=75449cb0-6c25-4f90-b765-84962c8c3e3a	http://s.cint.com/Survey/Fingerprint/75449cb0-6c25-4f90-b765-84962c8c3e3a		2111.0	[1, 2, 3, 4, 5, 6, 7, 8, 9]	00:07:46	75.108.104.16					1	2003	2	0	#NULL!	#NULL!	#NULL!	#NULL!	#NULL!	#NULL!	#NULL!	0	5	4	4	4	0	0	0	0	0	5	0	0	0	0	0	0	5
m5p85zvwhpxyu6wzpj7quuad32yko5sn	1	24880647	en	2014/11/24 9:41:25 PM	2014/11/24 9:46:03 PM	California	Google Chrome	Other		sample-provider=Cint&respondent=3b0c0c22-dbcb-42c7-81d9-b11fb9e8f358	http://s.cint.com/Survey/Fingerprint/3b0c0c22-dbcb-42c7-81d9-b11fb9e8f358?sq=1		2194.0	[1, 2, 3, 4, 5, 6, 7, 8, 9]	00:03:18	107.148.103.136					1	2005	4	0	#NULL!	#NULL!	#NULL!	#NULL!	#NULL!	#NULL!	#NULL!	1	4	5	3	3	4	5	4	4	5	4	3	4	5	5	3	2	5
w4rfhu64cfxpx1axfyylc3xwtp1qmxs1	1	24864871	en	2014/11/24 5:23:07 PM	2014/11/24 5:28:14 PM	Ohio	Google Chrome	Other		sample-provider=Cint&respondent=840e5fa9-fcd7-4d4d-ae81-c7a66873f987	http://s.cint.com/Survey/Fingerprint/840e5fa9-fcd7-4d4d-ae81-c7a66873f987?sq=1		2189.0	[1, 2, 3, 4, 5, 6, 7, 8, 9]	00:05:06	173.244.174.87					1	2007	8	0	#NULL!	#NULL!	#NULL!	#NULL!	#NULL!	#NULL!	#NULL!	1	4	4	3	4	3	4	4	3	4	4	3	4	4	4	3	4	4
kzln0pp5dx5rodw8njht2cnycywkpmnn	1	24835055	en	2014/11/24 11:38:59 AM	2014/11/24 11:46:02 AM		Safari	iPhone/iPod		sample-provider=Cint&respondent=5eb12c12-f004-4990-8c94-86d77eab8613	http://s.cint.com/Survey/Fingerprint/5eb12c12-f004-4990-8c94-86d77eab8613?sq=1		2127.0	[1, 2, 3, 4, 5, 6, 7, 8, 9]	00:07:02	10.16.235.107					1	2005	5	0	#NULL!	#NULL!	#NULL!	#NULL!	#NULL!	#NULL!	#NULL!	0	2	1	5	0	1	0	1	0	0	0	0	5	0	0	0	0	5
a4h2nj8df1n2kx5326zcie3agatskno9	1	24860171	en	2014/11/24 4:12:00 PM	2014/11/24 4:20:15 PM	United States	Safari	iPad		sample-provider=Cint&respondent=b3e43ddb-5c9b-4d56-ab72-c1d74e17b871	http://s.cint.com/Survey/Fingerprint/b3e43ddb-5c9b-4d56-ab72-c1d74e17b871?sq=1		2161.0	[1, 2, 3, 4, 5, 6, 7, 8, 9]	00:08:14	70.211.128.4					0	2007	5	0	#NULL!	#NULL!	#NULL!	#NULL!	5	#NULL!	#NULL!	0	3	2	3	3	4	5	4	3	4	4	3	4	4	4	4	3	4
gbap4027ko2x9ku3khkadbm1eog6zjdh	1	24835739	en	2014/11/24 11:44:44 AM	2014/11/24 11:59:55 AM	California	Google Chrome	Other		sample-provider=Cint&respondent=93ec7bd3-8f93-4474-8a75-2a047399f684	http://s.cint.com/Survey/Fingerprint/93ec7bd3-8f93-4474-8a75-2a047399f684		2148.0	[1, 2, 3, 4, 5, 6, 7, 8, 9]	00:15:11	216.31.229.10					1	2005	3	0	#NULL!	#NULL!	#NULL!	#NULL!	#NULL!	#NULL!	#NULL!	1	1	3	1	2	4	4	3	4	4	2	2	1	2	2	1	2	5
8v36l412hcuougxcst8mc0bqyrzs633g	1	24816381	en	2014/11/24 8:33:00 AM	2014/11/24 9:02:25 AM	California	Safari	iPhone/iPod		sample-provider=Cint&respondent=5f654562-c92f-44a2-bace-ad4fee38ed3e	http://s.cint.com/Survey/Fingerprint/5f654562-c92f-44a2-bace-ad4fee38ed3e		2116.0	[1, 2, 3, 4, 5, 6, 7, 8, 9]	00:29:23	172.56.30.91					0	2007	9	#NULL!	1	#NULL!	#NULL!	#NULL!	#NULL!	#NULL!	#NULL!	0	2	0	0	0	1	2	0	0	0	0	0	0	0	0	0	0	3
idimt6vusxyrxyp8ic37dvgfr03zpo0r	1	24854261	en	2014/11/24 2:56:57 PM	2014/11/24 3:03:42 PM	Arizona	Google Chrome	Other		sample-provider=Cint&respondent=0d788f40-5730-4449-be97-b623a82e9e9f	http://s.cint.com/Survey/Fingerprint/0d788f40-5730-4449-be97-b623a82e9e9f		2139.0	[1, 2, 3, 4, 5, 6, 7, 8, 9]	00:06:44	72.201.29.194					1	2005	12	0	#NULL!	#NULL!	#NULL!	#NULL!	#NULL!	#NULL!	#NULL!	0	4	1	1	0	1	1	2	4	4	0	0	1	0	0	0	0	5
2n2vmyjuyow74roftvv5fwqj6bm5rcuo	1	24874117	en	2014/11/24 7:54:10 PM	2014/11/24 8:03:26 PM	Texas	Internet Explorer	Windows Mobile		sample-provider=Cint&respondent=3a6eb155-0336-4589-9bf9-34a11d68ece0	http://s.cint.com/Survey/Fingerprint/3a6eb155-0336-4589-9bf9-34a11d68ece0?sq=1		2165.0	[1, 2, 3, 4, 5, 6, 7, 8, 9]	00:09:16	172.56.15.141					0	2007	10	#NULL!	#NULL!	2	#NULL!	#NULL!	#NULL!	#NULL!	#NULL!	0	3	4	3	0	3	3	2	5	5	5	3	3	2	0	0	4	4
x7gjm7d5yrxww1hi4yafjdaguxwn5pxr	1	24868617	en	2014/11/24 6:41:08 PM	2014/11/24 6:46:23 PM	California	Safari	Other		sample-provider=Cint&respondent=c51ac99e-f8c9-43d4-a6d1-5ed15c06035a	http://s.cint.com/Survey/Fingerprint/c51ac99e-f8c9-43d4-a6d1-5ed15c06035a?sq=1		2105.0	[1, 2, 3, 4, 5, 6, 7, 8, 9]	00:05:15	98.176.245.187					1	2004	5	0	#NULL!	#NULL!	#NULL!	#NULL!	#NULL!	#NULL!	#NULL!	0	5	1	0	0	3	0	0	0	0	0	0	0	0	0	0	0	5
4yqr9do4sunlvhrlwvp5pqi8cupr4njj	1	24844051	en	2014/11/24 1:03:32 PM	2014/11/24 1:12:00 PM	Florida	Google Chrome	Android		sample-provider=Cint&respondent=89879b06-83ef-402e-aadb-644017ed5567	http://s.cint.com/Survey/Fingerprint/89879b06-83ef-402e-aadb-644017ed5567?sq=1		2132.0	[1, 2, 3, 4, 5, 6, 7, 8, 9]	00:08:09	98.183.15.168					1	2003	3	0	#NULL!	#NULL!	#NULL!	#NULL!	#NULL!	#NULL!	#NULL!	0	4	2	3	1	3	4	2	0	0	3	2	2	3	1	2	2	5
0k29nd9hlhxpywp6k2sk0o7unq7euh14	1	24852693	en	2014/11/24 2:37:55 PM	2014/11/24 2:43:44 PM	Florida	Firefox	Other		sample-provider=Cint&respondent=fae39dbf-05d1-4769-a63f-59b4a951f164	http://s.cint.com/Survey/Fingerprint/fae39dbf-05d1-4769-a63f-59b4a951f164?sq=1		2111.0	[1, 2, 3, 4, 5, 6, 7, 8, 9]	00:05:48	76.106.234.182					0	2006	6	0	#NULL!	#NULL!	#NULL!	#NULL!	#NULL!	#NULL!	#NULL!	1	1	2	0	0	1	0	1	0	4	2	0	2	3	0	1	0	2
ha9o74zkfeo4axmlubeh4nu7unfodbp0	1	24837377	en	2014/11/24 11:58:43 AM	2014/11/24 12:16:02 PM	Kansas	Firefox	Other		sample-provider=Cint&respondent=419e49b4-0718-4798-9b16-95773636b1dc	http://s.cint.com/Survey/Fingerprint/419e49b4-0718-4798-9b16-95773636b1dc		2123.0	[1, 2, 3, 4, 5, 6, 7, 8, 9]	00:17:17	165.201.162.178					1	2005	3	0	#NULL!	#NULL!	#NULL!	#NULL!	#NULL!	#NULL!	#NULL!	0	4	3	0	0	1	2	1	4	4	3	0	2	1	0	0	0	4
wp6948ve3qemnw7tx386y4zcuefqtubk	1	24835519	en	2014/11/24 11:42:58 AM	2014/11/24 11:47:07 AM	Wisconsin	Google Chrome	Other		sample-provider=Cint&respondent=b625b20e-43d8-4b87-990c-384e2fb01a6d	http://s.cint.com/Survey/Fingerprint/b625b20e-43d8-4b87-990c-384e2fb01a6d?sq=1		2117.0	[1, 2, 3, 4, 5, 6, 7, 8, 9]	00:04:08	72.135.116.120					0	2003	10	0	#NULL!	#NULL!	#NULL!	#NULL!	#NULL!	#NULL!	#NULL!	0	3	2	0	0	1	1	2	0	0	2	0	0	0	0	0	3	3
ocuzobtyg4wvtoxxwkse9kvaa072wh52	1	24888193	en	2014/11/25 1:19:38 AM	2014/11/25 1:31:26 AM	Oregon	Google Chrome	Other		sample-provider=Cint&respondent=ce09f074-d741-4ee2-a9dd-2d12f0d99a18	http://s.cint.com/Survey/Fingerprint/ce09f074-d741-4ee2-a9dd-2d12f0d99a18		2134.0	[1, 2, 3, 4, 5, 6, 7, 8, 9]	00:11:47	71.34.80.57					0	2003	7	0	#NULL!	#NULL!	#NULL!	#NULL!	#NULL!	#NULL!	#NULL!	0	2	5	2	2	3	1	4	0	0	5	0	3	0	0	0	0	4
okzag8rcptmfo9zdof2javvjwx035eqr	1	24831453	en	2014/11/24 11:02:46 AM	2014/11/24 11:07:00 AM	Connecticut	Firefox	Other		sample-provider=Cint&respondent=78bc0a28-e7fa-4627-8a33-ff14e10716dd	http://s.cint.com/Survey/Fingerprint/78bc0a28-e7fa-4627-8a33-ff14e10716dd		2139.0	[1, 2, 3, 4, 5, 6, 7, 8, 9]	00:04:14	174.79.166.249					0	2004	12	0	#NULL!	#NULL!	#NULL!	#NULL!	#NULL!	#NULL!	#NULL!	0	5	2	1	0	2	1	2	0	0	2	0	0	0	0	0	2	3
9b7khrjdjqrq9cni3g5xqva0skh6a1ip	1	24844245	en	2014/11/24 1:06:22 PM	2014/11/24 1:14:19 PM	New York	Safari	iPhone/iPod		sample-provider=Cint&respondent=f135afe7-45c8-41d6-b77b-0bfad5c70811	http://s.cint.com/Survey/Fingerprint/f135afe7-45c8-41d6-b77b-0bfad5c70811?sq=1		2117.0	[1, 2, 3, 4, 5, 6, 7, 8, 9]	00:07:57	24.184.121.27					1	2003	2	#NULL!	#NULL!	#NULL!	3	#NULL!	#NULL!	#NULL!	#NULL!	0	3	2	2	2	1	2	2	0	0	2	0	2	0	0	0	3	4
tahlfictfx2coj4dgsi1y77q8pif9rge	1	24837129	en	2014/11/24 11:56:30 AM	2014/11/24 12:00:59 PM	Minnesota	Internet Explorer	Other		sample-provider=Cint&respondent=633322d7-4b22-40af-aece-fc634e60230f	http://s.cint.com/Survey/Fingerprint/633322d7-4b22-40af-aece-fc634e60230f		2122.0	[1, 2, 3, 4, 5, 6, 7, 8, 9]	00:04:29	129.176.151.24					1	2005	4	0	#NULL!	#NULL!	#NULL!	#NULL!	#NULL!	#NULL!	#NULL!	0	4	1	1	0	2	3	2	0	2	1	0	1	0	0	0	2	5
4xxgtjgy80c2s70xdbjsrr9peep66991	1	24859179	en	2014/11/24 3:58:41 PM	2014/11/24 4:09:50 PM	Ohio	Google Chrome	Other		sample-provider=Cint&respondent=350a0c21-d8cd-4d7e-92b1-837e44ddff7f	http://s.cint.com/Survey/Fingerprint/350a0c21-d8cd-4d7e-92b1-837e44ddff7f?sq=1		2113.0	[1, 2, 3, 4, 5, 6, 7, 8, 9]	00:11:09	76.181.215.157					1	2003	9	0	#NULL!	#NULL!	#NULL!	#NULL!	#NULL!	#NULL!	#NULL!	1	2	1	0	0	1	2	1	0	0	3	0	1	0	0	0	1	3
qzdxn1rcanj7jny6tqxd6lmw2n0xqdma	1	24853669	en	2014/11/24 2:49:42 PM	2014/11/24 3:17:25 PM	Kentucky	Google Chrome	Android		sample-provider=Cint&respondent=e8d4fcdc-b91e-4210-9f12-8e1583dbf284	http://s.cint.com/Survey/Fingerprint/e8d4fcdc-b91e-4210-9f12-8e1583dbf284?sq=1		2111.0	[1, 2, 3, 4, 5, 6, 7, 8, 9]	00:27:43	69.176.50.225					0	2004	1	0	#NULL!	#NULL!	#NULL!	#NULL!	#NULL!	#NULL!	#NULL!	0	3	3	1	0	1	2	2	5	5	5	1	1	0	2	2	0	2
jqdrlewtomvo5hjth93tv6qhkukgi31i	1	24857187	en	2014/11/24 3:30:06 PM	2014/11/24 4:03:22 PM	Texas	Firefox	Other		sample-provider=Cint&respondent=27a61cca-5642-4038-a4d1-dc2efe1ba2ee	http://s.cint.com/Survey/Fingerprint/27a61cca-5642-4038-a4d1-dc2efe1ba2ee?sq=1		2165.0	[1, 2, 3, 4, 5, 6, 7, 8, 9]	00:33:15	108.193.110.95					1	2007	10	0	#NULL!	#NULL!	#NULL!	#NULL!	#NULL!	#NULL!	#NULL!	2	3	4	3	4	3	3	3	3	4	3	3	0	3	3	2	2	5
jh8cxiv6cxfyrrfnp24oiy4h7czokv7y	1	24821427	en	2014/11/24 9:32:19 AM	2014/11/24 9:38:28 AM	Ohio	Internet Explorer	Other		sample-provider=Cint&respondent=d989c3e1-9124-4b10-9856-18de74415f56	http://s.cint.com/Survey/Fingerprint/d989c3e1-9124-4b10-9856-18de74415f56		2102.0	[1, 2, 3, 4, 5, 6, 7, 8, 9]	00:06:09	50.51.154.253					0	2003	8	0	#NULL!	#NULL!	#NULL!	#NULL!	#NULL!	#NULL!	#NULL!	0	3	2	0	0	1	0	2	0	0	0	0	0	0	0	0	0	5
lrubhte9dmfus7eh20etncu2ww6dfk66	1	24852097	en	2014/11/24 2:32:02 PM	2014/11/24 2:40:34 PM	South Carolina	Firefox	Other		sample-provider=Cint&respondent=8ef24b3d-a4f0-4e07-9dff-8b6ac655d44d	http://s.cint.com/Survey/Fingerprint/8ef24b3d-a4f0-4e07-9dff-8b6ac655d44d		2123.0	[1, 2, 3, 4, 5, 6, 7, 8, 9]	00:08:31	75.176.157.106					0	2003	3	#NULL!	#NULL!	2	#NULL!	#NULL!	#NULL!	#NULL!	#NULL!	0	3	2	0	0	1	1	0	0	0	3	0	2	2	2	2	2	5
0dfmyea9wbv4azbprrf5oflv9i3yelsa	1	24853673	en	2014/11/24 2:49:46 PM	2014/11/24 3:00:17 PM	California	Firefox	Other		sample-provider=Cint&respondent=9566332b-64a9-4908-b292-32e89fb07169	http://s.cint.com/Survey/Fingerprint/9566332b-64a9-4908-b292-32e89fb07169?sq=1		2130.0	[1, 2, 3, 4, 5, 6, 7, 8, 9]	00:10:30	99.189.4.173					0	2003	7	0	#NULL!	#NULL!	#NULL!	4	#NULL!	#NULL!	#NULL!	0	0	0	1	1	5	5	2	0	0	0	0	2	0	0	0	5	5
6jcustbeyb0agww7sf0ci3sv2qupn0ml	1	24855207	en	2014/11/24 3:06:25 PM	2014/11/24 3:10:13 PM	New York	Safari	Other		sample-provider=Cint&respondent=064a3e9b-f68a-4e8e-b1e9-8ab57db9bd4b	http://s.cint.com/Survey/Fingerprint/064a3e9b-f68a-4e8e-b1e9-8ab57db9bd4b?sq=1		2123.0	[1, 2, 3, 4, 5, 6, 7, 8, 9]	00:03:47	74.64.26.255					0	2006	5	0	#NULL!	#NULL!	#NULL!	#NULL!	#NULL!	#NULL!	#NULL!	0	0	0	0	1	4	3	2	0	0	0	2	3	0	0	0	2	2
uyprzt5a7nowbgtxsiowxuuajkn7499x	1	24822127	en	2014/11/24 9:39:20 AM	2014/11/24 9:46:28 AM	New York	Opera	Other		sample-provider=Cint&respondent=a015924b-530d-45b6-9ddd-086f54a536f8	http://s.cint.com/Survey/Fingerprint/a015924b-530d-45b6-9ddd-086f54a536f8?sq=1		2143.0	[1, 2, 3, 4, 5, 6, 7, 8, 9]	00:07:08	172.254.63.195					0	2005	7	0	#NULL!	2	3	#NULL!	#NULL!	#NULL!	#NULL!	0	0	0	2	0	4	4	4	2	2	0	0	3	0	0	0	3	5
1wyx5dgdw7nd9mm7qt79retqmbe5gzbn	1	24839603	en	2014/11/24 12:17:45 PM	2014/11/24 12:29:07 PM	Iowa	Internet Explorer	Other		sample-provider=Cint&respondent=e1140c81-1130-4221-91d7-38756dfcaccb	http://s.cint.com/Survey/Fingerprint/e1140c81-1130-4221-91d7-38756dfcaccb		2109.0	[1, 2, 3, 4, 5, 6, 7, 8, 9]	00:11:22	63.152.62.219					1	2003	4	0	#NULL!	#NULL!	#NULL!	#NULL!	#NULL!	#NULL!	#NULL!	0	2	2	0	0	2	0	0	2	2	2	0	2	0	0	0	1	1
8eewtws3gjzez94t5pqn5e3rz04zoajp	1	24837877	en	2014/11/24 12:03:19 PM	2014/11/24 12:12:15 PM	Iowa	Internet Explorer	Other		sample-provider=Cint&respondent=0bd72d00-eb1b-420e-a3d7-2de9e8211794	http://queensu.fluidsurveys.com/surveys/dr-janssen/parental-influence-and-active-play-1/?sample-provider=Cint&respondent=0bd72d00-eb1b-420e-a3d7-2de9e8211794		2115.0	[1, 2, 3, 4, 5, 6, 7, 8, 9]	00:08:54	205.167.3.34					0	2007	3	0	#NULL!	#NULL!	#NULL!	#NULL!	#NULL!	#NULL!	#NULL!	0	3	3	2	0	2	0	2	0	0	3	0	0	0	0	0	2	4
vld7jb4oy7rjq2owa5hxysocitj4qa71	1	24866413	en	2014/11/24 5:53:07 PM	2014/11/24 5:57:24 PM	Texas	Internet Explorer	Other		sample-provider=Cint&respondent=31e1dc75-2e91-4a49-bfe6-1a08ce84e412	http://s.cint.com/Survey/Fingerprint/31e1dc75-2e91-4a49-bfe6-1a08ce84e412?sq=1		2112.0	[1, 2, 3, 4, 5, 6, 7, 8, 9]	00:04:17	64.185.59.30					0	2004	10	0	#NULL!	#NULL!	#NULL!	#NULL!	#NULL!	#NULL!	#NULL!	0	3	0	1	0	2	0	0	0	0	0	0	0	0	0	0	0	4
tppgvgvykarvjqd0rvtls3be6mpt3vd0	1	24825497	en	2014/11/24 10:04:00 AM	2014/11/24 10:16:04 AM	North Carolina	Safari	Android		sample-provider=Cint&respondent=ec7d6783-2987-4714-950e-11f4c7f072dc	http://s.cint.com/Survey/Fingerprint/ec7d6783-2987-4714-950e-11f4c7f072dc?sq=1		2117.0	[1, 2, 3, 4, 5, 6, 7, 8, 9]	00:12:04	206.53.122.15					1	2003	5	#NULL!	#NULL!	2	#NULL!	#NULL!	#NULL!	#NULL!	#NULL!	0	3	2	4	0	0	3	2	0	0	2	0	1	0	0	0	0	3
qmun83hs026vpmu1uszfamwuo6p9u680	1	24883589	en	2014/11/24 11:12:12 PM	2014/11/25 10:37:58 PM	Wisconsin	Internet Explorer	Other		sample-provider=Cint&respondent=aaf5725e-5483-43c8-9e84-ad1dd205a1fa	http://s.cint.com/Survey/Fingerprint/aaf5725e-5483-43c8-9e84-ad1dd205a1fa?sq=1		2118.0	[1, 2, 3, 4, 5, 6, 7, 8, 9]	23:25:45	99.189.120.8					1	2005	8	0	#NULL!	#NULL!	#NULL!	#NULL!	#NULL!	#NULL!	#NULL!	0	2	2	0	0	1	1	0	0	0	2	0	0	0	0	0	2	4
s6q3n6iy7oualxh0qsal3yvtc5efdyss	1	24850677	en	2014/11/24 2:13:49 PM	2014/11/24 2:20:21 PM	Ohio	Internet Explorer	Other		sample-provider=Cint&respondent=9f0f0ca9-cc5d-417c-81bc-537a029bf70a	http://s.cint.com/Survey/Fingerprint/9f0f0ca9-cc5d-417c-81bc-537a029bf70a?sq=1		2111.0	[1, 2, 3, 4, 5, 6, 7, 8, 9]	00:06:32	107.10.187.84					0	2005	2	0	#NULL!	#NULL!	#NULL!	#NULL!	#NULL!	#NULL!	#NULL!	0	5	2	5	0	0	0	0	0	0	0	0	0	0	0	0	2	3
7k2twh7ji5mgj8km6dgcx6qrt6cq392i	1	24816293	en	2014/11/24 8:31:17 AM	2014/11/24 8:36:52 AM	Georgia	Firefox	Other		sample-provider=Cint&respondent=6fd7d88b-c8d9-488b-a174-4a3fad903a4b	http://s.cint.com/Survey/Fingerprint/6fd7d88b-c8d9-488b-a174-4a3fad903a4b		2110.0	[1, 2, 3, 4, 5, 6, 7, 8, 9]	00:05:35	108.78.220.246					1	2007	9	0	#NULL!	#NULL!	#NULL!	#NULL!	#NULL!	#NULL!	#NULL!	0	5	0	1	0	2	0	0	0	0	0	0	0	0	0	0	2	0
q3a6u1pgm80xnsrxqhki150wxyr2hf3b	1	24812433	en	2014/11/24 7:16:33 AM	2014/11/24 7:21:07 AM	Ohio	Internet Explorer	Other		sample-provider=Cint&respondent=8733608f-7f5e-44d8-afdf-820a93f55a7b	http://s.cint.com/Survey/Fingerprint/8733608f-7f5e-44d8-afdf-820a93f55a7b		2108.0	[1, 2, 3, 4, 5, 6, 7, 8, 9]	00:04:31	173.89.246.242					0	2005	12	0	#NULL!	#NULL!	#NULL!	#NULL!	#NULL!	#NULL!	#NULL!	0	3	1	3	0	0	0	1	0	0	0	0	1	0	0	0	0	2
z584o7ptggzcj601htiw8flfezn2wfts	1	24813251	en	2014/11/24 7:32:38 AM	2014/11/24 7:40:32 AM	Illinois	Safari	Android		sample-provider=Cint&respondent=6d8520b0-8df3-43a5-b7d8-eaf531f17c44	http://s.cint.com/Survey/Fingerprint/6d8520b0-8df3-43a5-b7d8-eaf531f17c44		2095.0	[1, 2, 3, 4, 5, 6, 7, 8, 9]	00:07:54	99.38.241.197					1	2004	1	0	#NULL!	#NULL!	#NULL!	#NULL!	#NULL!	#NULL!	#NULL!	0	0	0	0	0	0	3	0	0	0	0	0	0	0	0	0	3	4
icu5g9kfacla1ft2ijoitcxsmvjkfv7x	1	24879621	en	2014/11/24 9:26:18 PM	2014/11/24 9:56:19 PM	Nebraska	Safari	Other		sample-provider=Cint&respondent=aa8359bd-0bbf-4bd6-b89e-4bb8747a82e5	http://s.cint.com/Survey/Fingerprint/aa8359bd-0bbf-4bd6-b89e-4bb8747a82e5?sq=1		2088.0	[1, 2, 3, 4, 5, 6, 7, 8, 9]	00:30:00	174.70.42.63					1	2003	1	#NULL!	1	#NULL!	#NULL!	#NULL!	#NULL!	#NULL!	#NULL!	0	3	2	0	0	0	0	0	0	0	0	0	0	0	0	0	0	4
1j97jrpp9lyud905gyyl2p6i4mptu4h8	1	24829503	en	2014/11/24 10:45:24 AM	2014/11/24 10:51:12 AM	Louisiana	Safari	iPad		sample-provider=Cint&respondent=bfeb8090-0282-4c83-b4ca-e6c6ee9f9ea9	http://s.cint.com/Survey/Fingerprint/bfeb8090-0282-4c83-b4ca-e6c6ee9f9ea9?sq=1		2100.0	[1, 2, 3, 4, 5, 6, 7, 8, 9]	00:05:48	184.38.42.236					1	2003	1	0	#NULL!	#NULL!	#NULL!	#NULL!	#NULL!	#NULL!	#NULL!	0	5	1	1	0	2	4	2	0	0	2	0	2	0	0	0	0	5
78p0o46qaaceqmw4aibcr9zjkz758t17	1	24873383	en	2014/11/24 7:39:10 PM	2014/11/24 7:45:44 PM	Idaho	Firefox	Other		sample-provider=Cint&respondent=0612ce85-2729-4819-a9ee-d6d35676e8f6	http://s.cint.com/Survey/Fingerprint/0612ce85-2729-4819-a9ee-d6d35676e8f6?sq=1		2102.0	[1, 2, 3, 4, 5, 6, 7, 8, 9]	00:06:34	64.126.171.127					0	2004	9	0	#NULL!	#NULL!	#NULL!	#NULL!	#NULL!	#NULL!	#NULL!	0	4	1	1	0	0	0	0	5	5	1	0	0	0	0	0	3	4
q7f8oizktj5uj3ga7wvbv4i1z2l1ex5u	1	24820619	en	2014/11/24 9:23:45 AM	2014/11/24 9:29:37 AM	Montana	Google Chrome	Other		sample-provider=Cint&respondent=d4f0fc93-3f0f-4da1-a7b8-63d55e46a9c1	http://s.cint.com/Survey/Fingerprint/d4f0fc93-3f0f-4da1-a7b8-63d55e46a9c1?sq=1		2116.0	[1, 2, 3, 4, 5, 6, 7, 8, 9]	00:05:51	184.166.178.168					0	2006	12	0	#NULL!	#NULL!	#NULL!	#NULL!	#NULL!	#NULL!	#NULL!	0	4	0	4	0	2	0	2	0	0	0	0	0	0	0	0	0	4
bx6fumswthhurhsz05y9pj8j09a0oibk	1	24862431	en	2014/11/24 4:43:09 PM	2014/11/24 4:50:05 PM	New York	Safari	iPad		sample-provider=Cint&respondent=4b31a50b-8cc1-4570-9f3f-2425534f6163	http://s.cint.com/Survey/Fingerprint/4b31a50b-8cc1-4570-9f3f-2425534f6163?sq=1		2123.0	[1, 2, 3, 4, 5, 6, 7, 8, 9]	00:06:54	24.29.90.216					0	2007	11	0	#NULL!	#NULL!	#NULL!	#NULL!	#NULL!	#NULL!	#NULL!	0	3	1	0	0	3	1	1	5	5	3	1	1	1	0	1	0	4
j9m6tmfybi9l72mghgab0m63fsiuievw	1	24855311	en	2014/11/24 3:07:26 PM	2014/11/24 3:12:34 PM	New Jersey	Google Chrome	Other		sample-provider=Cint&respondent=27c4ec23-4733-44a9-8a50-8d4e31ebc438	http://s.cint.com/Survey/Fingerprint/27c4ec23-4733-44a9-8a50-8d4e31ebc438?sq=1		2094.0	[1, 2, 3, 4, 5, 6, 7, 8, 9]	00:05:08	71.0.107.167					0	2007	3	0	#NULL!	#NULL!	#NULL!	#NULL!	#NULL!	#NULL!	#NULL!	0	5	2	0	1	1	0	1	0	0	0	0	0	0	0	0	0	4
p8im56m7diiadv0o1jcetqtdqa2o9ez8	1	24839681	en	2014/11/24 12:18:29 PM	2014/11/24 12:28:07 PM	Louisiana	Internet Explorer	Other		sample-provider=Cint&respondent=c9033c77-35b5-4db0-aa6f-364e6f6a5dd8	http://s.cint.com/Survey/Fingerprint/c9033c77-35b5-4db0-aa6f-364e6f6a5dd8		2118.0	[1, 2, 3, 4, 5, 6, 7, 8, 9]	00:09:38	98.80.17.72					1	2005	9	0	#NULL!	#NULL!	#NULL!	#NULL!	#NULL!	#NULL!	#NULL!	0	5	2	0	0	0	5	0	0	0	2	1	1	1	1	1	0	5
qxe9f28e2wnq6yjrcmvcg3kzsner2c63	1	24855219	en	2014/11/24 3:06:32 PM	2014/11/24 3:14:22 PM	Indiana	Internet Explorer	Other		sample-provider=Cint&respondent=c9485d87-e32b-41cb-bc2b-579fe4d37439	http://s.cint.com/Survey/Fingerprint/c9485d87-e32b-41cb-bc2b-579fe4d37439?sq=1		2107.0	[1, 2, 3, 4, 5, 6, 7, 8, 9]	00:07:50	69.128.170.117					1	2005	3	0	#NULL!	#NULL!	#NULL!	#NULL!	#NULL!	#NULL!	#NULL!	0	2	2	0	0	2	1	2	5	5	3	0	3	0	0	0	0	2
xfl87d7gj4ava6d9pf975whane210b76	1	24830061	en	2014/11/24 10:50:45 AM	2014/11/24 10:54:28 AM	Iowa	Firefox	Other		sample-provider=Cint&respondent=e01eac67-63f2-4d98-b563-cc2640bda9b7	http://s.cint.com/Survey/Fingerprint/e01eac67-63f2-4d98-b563-cc2640bda9b7		2104.0	[1, 2, 3, 4, 5, 6, 7, 8, 9]	00:03:43	67.43.18.65					0	2005	12	0	1	2	#NULL!	#NULL!	#NULL!	#NULL!	#NULL!	1	3	1	0	0	2	0	2	0	0	0	0	0	0	0	0	2	3
7j33iww250cu1vl2077ti084vef6zsyj	1	24887737	en	2014/11/25 12:56:16 AM	2014/11/25 1:05:24 AM	Pennsylvania	Internet Explorer	Other		sample-provider=Cint&respondent=b56a47f0-4b41-4b63-a71b-55e9df4c8264	http://s.cint.com/Survey/Fingerprint/b56a47f0-4b41-4b63-a71b-55e9df4c8264?sq=1		2100.0	[1, 2, 3, 4, 5, 6, 7, 8, 9]	00:09:08	108.22.89.118					0	2006	6	0	#NULL!	#NULL!	#NULL!	#NULL!	#NULL!	#NULL!	#NULL!	1	2	0	0	0	1	0	0	0	0	0	0	1	0	0	0	0	5
mmkpp7rdbq9jyv6uiamogenfh933n1cp	1	24857809	en	2014/11/24 3:39:34 PM	2014/11/24 3:44:15 PM	South Carolina	Google Chrome	Other		sample-provider=Cint&respondent=5e18449e-e841-46fd-87c2-57e2d98bdfbf	http://s.cint.com/Survey/Fingerprint/5e18449e-e841-46fd-87c2-57e2d98bdfbf?sq=1		2096.0	[1, 2, 3, 4, 5, 6, 7, 8, 9]	00:04:41	108.197.74.0					1	2004	4	0	#NULL!	#NULL!	#NULL!	#NULL!	#NULL!	#NULL!	#NULL!	0	2	2	1	0	0	1	2	0	0	0	0	0	0	0	0	1	2
l1c8rf7fn8ov37jhru8fs6ev135gyrll	1	24888877	en	2014/11/25 1:50:43 AM	2014/11/25 1:57:48 AM	Illinois	Google Chrome	Other		sample-provider=Cint&respondent=dc1ddfce-5a90-48cd-ac29-77ed9e693288	http://s.cint.com/Survey/Fingerprint/dc1ddfce-5a90-48cd-ac29-77ed9e693288		2189.0	[1, 2, 3, 4, 5, 6, 7, 8, 9]	00:07:04	50.13.46.204					1	2005	3	#NULL!	1	#NULL!	#NULL!	#NULL!	#NULL!	#NULL!	#NULL!	0	3	3	3	3	4	4	4	4	4	4	4	3	3	3	3	4	4
p7pjifrdv2ara4zcnbhur2rstlxg3r0j	1	24820155	en	2014/11/24 9:17:22 AM	2014/11/24 9:21:22 AM	Arizona	Firefox	Other		sample-provider=Cint&respondent=445493d6-8b61-42b7-bcf9-2f2e627b2841	http://s.cint.com/Survey/Fingerprint/445493d6-8b61-42b7-bcf9-2f2e627b2841		2133.0	[1, 2, 3, 4, 5, 6, 7, 8, 9]	00:03:59	72.208.147.160					0	2006	10	0	1	#NULL!	#NULL!	#NULL!	#NULL!	#NULL!	#NULL!	0	3	2	2	2	2	4	2	1	1	1	1	1	1	2	2	2	2
oqb59ox6dy4unckcdvq93jb95mbhggc8	1	24869201	en	2014/11/24 6:54:41 PM	2014/11/24 6:59:22 PM	California	Internet Explorer	Other		sample-provider=Cint&respondent=c14e6669-ba09-4471-a735-41c6950e3137	http://s.cint.com/Survey/Fingerprint/c14e6669-ba09-4471-a735-41c6950e3137?sq=1		2153.0	[1, 2, 3, 4, 5, 6, 7, 8, 9]	00:04:41	208.54.39.174					1	2004	12	0	1	#NULL!	#NULL!	#NULL!	#NULL!	#NULL!	#NULL!	1	3	3	1	1	2	2	2	4	4	2	1	2	2	2	2	2	3
9z3nnuzakx9nmkzlsm05t2qd5740dwvv	1	24840579	en	2014/11/24 12:26:25 PM	2014/11/24 12:36:48 PM	Arizona	Firefox	Other		sample-provider=Cint&respondent=3eb8c903-ed83-43ec-aa95-6e9b8bd03da3	http://s.cint.com/Survey/Fingerprint/3eb8c903-ed83-43ec-aa95-6e9b8bd03da3		2115.0	[1, 2, 3, 4, 5, 6, 7, 8, 9]	00:10:23	72.208.174.104					0	2006	6	0	#NULL!	#NULL!	#NULL!	#NULL!	#NULL!	#NULL!	#NULL!	0	3	1	0	0	2	1	0	2	2	2	0	1	0	0	0	0	4
ah3dbnrt5u0iva6gi7bwwwuicdfhdi7u	1	24851045	en	2014/11/24 2:19:01 PM	2014/11/24 2:23:22 PM	Virginia	Firefox	Other		sample-provider=Cint&respondent=0ac7e9ad-40b0-4e90-93c0-06aaed33b3de	http://s.cint.com/Survey/Fingerprint/0ac7e9ad-40b0-4e90-93c0-06aaed33b3de?sq=1		2116.0	[1, 2, 3, 4, 5, 6, 7, 8, 9]	00:04:21	173.66.52.166					1	2003	6	0	#NULL!	#NULL!	#NULL!	#NULL!	#NULL!	#NULL!	#NULL!	0	2	0	0	0	0	0	2	4	3	1	0	1	0	0	0	4	3
rktodumav5znf6ksyeggg0fo2nnros8e	1	24835137	en	2014/11/24 11:39:29 AM	2014/11/24 11:43:27 AM	United States	Google Chrome	Other		sample-provider=Cint&respondent=3b844589-2717-46d7-9414-fedc203aad87	http://s.cint.com/Survey/Fingerprint/3b844589-2717-46d7-9414-fedc203aad87?sq=1		2121.0	[1, 2, 3, 4, 5, 6, 7, 8, 9]	00:03:58	104.5.116.225					1	2004	12	0	#NULL!	#NULL!	#NULL!	#NULL!	#NULL!	#NULL!	#NULL!	0	0	0	2	0	2	0	2	5	5	0	0	1	0	0	0	0	3
jduyl1p3f1vblkzj6s8ba13gwbhy8jc6	1	24878705	en	2014/11/24 9:12:44 PM	2014/11/24 9:20:49 PM	Michigan	Internet Explorer	Other		sample-provider=Cint&respondent=630f4112-0d51-4203-8fc4-5e15a6bb2a4f	http://s.cint.com/Survey/Fingerprint/630f4112-0d51-4203-8fc4-5e15a6bb2a4f		2111.0	[1, 2, 3, 4, 5, 6, 7, 8, 9]	00:08:03	99.117.70.5					0	2003	6	0	#NULL!	#NULL!	#NULL!	#NULL!	#NULL!	#NULL!	#NULL!	0	3	3	1	1	0	0	0	0	0	2	0	0	0	0	0	2	2
cyy0xqu8ovnq8f21gje9v7awmbaocu7a	1	24815483	en	2014/11/24 8:14:13 AM	2014/11/24 8:17:14 AM	Georgia	Firefox	Other		sample-provider=Cint&respondent=82617275-ae07-4ea9-83ff-4fbe4589f632	http://s.cint.com/Survey/Fingerprint/82617275-ae07-4ea9-83ff-4fbe4589f632?sq=1		2153.0	[1, 2, 3, 4, 5, 6, 7, 8, 9]	00:03:01	50.167.64.146					1	2006	4	#NULL!	1	2	#NULL!	#NULL!	#NULL!	#NULL!	#NULL!	1	1	2	2	2	1	2	3	1	2	2	1	2	1	2	2	2	4
b5hc6zqnqtotuj4rnh4066ok8yflujfy	1	24882971	en	2014/11/24 10:49:39 PM	2014/11/24 11:06:09 PM	Pennsylvania	Google Chrome	Other		sample-provider=Cint&respondent=5c4446b0-24c6-4b01-aadb-d834eaf80a52	http://s.cint.com/Survey/Fingerprint/5c4446b0-24c6-4b01-aadb-d834eaf80a52		2102.0	[1, 2, 3, 4, 5, 6, 7, 8, 9]	00:16:29	72.95.133.160					1	2007	7	0	#NULL!	#NULL!	#NULL!	#NULL!	#NULL!	#NULL!	#NULL!	0	3	2	2	0	0	0	0	3	3	2	1	1	1	0	0	0	3
bb7z4jn8w8k7yyvsmveh09iysvb978dz	1	24834413	en	2014/11/24 11:32:41 AM	2014/11/24 11:41:07 AM	Texas	Google Chrome	Android		sample-provider=Cint&respondent=70313232-e077-447d-a2b5-05411aaae42f	http://s.cint.com/Survey/Fingerprint/70313232-e077-447d-a2b5-05411aaae42f?sq=1		2108.0	[1, 2, 3, 4, 5, 6, 7, 8, 9]	00:08:25	173.224.98.78					1	2004	5	0	#NULL!	#NULL!	#NULL!	#NULL!	#NULL!	#NULL!	#NULL!	0	2	1	3	0	1	0	1	0	0	1	0	0	0	0	0	2	0
2fve9vzbcswokylmjlu81wta5cprva51	1	24852801	en	2014/11/24 2:39:08 PM	2014/11/24 2:46:26 PM	United States	Google Chrome	Other		sample-provider=Cint&respondent=495a4ad7-415a-4cc0-abeb-ea8941ee0e9c	http://s.cint.com/Survey/Fingerprint/495a4ad7-415a-4cc0-abeb-ea8941ee0e9c?sq=1		2116.0	[1, 2, 3, 4, 5, 6, 7, 8, 9]	00:07:16	104.131.21.54					0	2004	4	0	#NULL!	#NULL!	#NULL!	#NULL!	#NULL!	#NULL!	#NULL!	1	1	1	1	1	1	1	1	2	0	0	0	2	1	0	0	0	3
dsw4qab09wsqppj8wyz64zqd4w7dp55o	1	24836195	en	2014/11/24 11:48:42 AM	2014/11/24 11:53:47 AM	California	Safari	Other		sample-provider=Cint&respondent=b8f013e7-0e49-44dc-b563-ee213e2655e4	http://s.cint.com/Survey/Fingerprint/b8f013e7-0e49-44dc-b563-ee213e2655e4?sq=1		2095.0	[1, 2, 3, 4, 5, 6, 7, 8, 9]	00:05:05	68.6.159.172					0	2005	4	#NULL!	#NULL!	#NULL!	#NULL!	#NULL!	5	#NULL!	#NULL!	0	2	1	2	0	1	2	1	0	0	0	0	0	0	0	0	3	3
2nhr2l3yc1g3vlc06e3hxhbyxhwa63kn	1	24841693	en	2014/11/24 12:36:37 PM	2014/11/24 12:47:56 PM	Pennsylvania	Google Chrome	Other		sample-provider=Cint&respondent=7b14fe46-a60d-407a-82be-339f9a6b96b2	http://s.cint.com/Survey/Fingerprint/7b14fe46-a60d-407a-82be-339f9a6b96b2?sq=1		2116.0	[1, 2, 3, 4, 5, 6, 7, 8, 9]	00:11:19	173.71.172.32					1	2004	3	0	#NULL!	#NULL!	#NULL!	#NULL!	#NULL!	#NULL!	#NULL!	0	2	1	0	0	1	0	1	4	4	1	1	0	0	0	0	2	4
uqms7nmi4detg17thcn1ltn0s8xi4jut	1	24811511	en	2014/11/24 7:03:08 AM	2014/11/24 7:13:27 AM	Florida	Google Chrome	Android		sample-provider=Cint&respondent=6ebde3a1-e8f8-4cfe-9714-f264c2bcee27	http://s.cint.com/Survey/Fingerprint/6ebde3a1-e8f8-4cfe-9714-f264c2bcee27?sq=1		2113.0	[1, 2, 3, 4, 5, 6, 7, 8, 9]	00:10:18	67.8.175.189					1	2003	1	0	#NULL!	#NULL!	#NULL!	#NULL!	#NULL!	#NULL!	#NULL!	0	2	0	2	1	3	0	0	2	0	3	5	3	0	0	0	1	5
9wf2sa4ds86qizrin6rcfwmlkv1f2cdg	1	24867081	en	2014/11/24 6:07:42 PM	2014/11/24 6:10:37 PM	District of Columbia	Internet Explorer	Other		sample-provider=Cint&respondent=dad0393d-551d-417f-be49-4aec51299ad0	http://s.cint.com/Survey/Fingerprint/dad0393d-551d-417f-be49-4aec51299ad0?sq=1		2149.0	[1, 2, 3, 4, 5, 6, 7, 8, 9]	00:02:55	12.0.225.240					1	2004	9	#NULL!	1	#NULL!	#NULL!	#NULL!	#NULL!	#NULL!	#NULL!	1	3	3	3	1	2	2	2	5	5	2	2	2	2	2	2	2	5
wnxk91wt062p7gc8fxg2bqabnmy9294s	1	24855643	en	2014/11/24 3:11:58 PM	2014/11/24 3:14:14 PM	Connecticut	Safari	Other		sample-provider=Cint&respondent=3ddc553b-a921-487f-a1b9-c3adf78ded36	http://s.cint.com/Survey/Fingerprint/3ddc553b-a921-487f-a1b9-c3adf78ded36?sq=1		2132.0	[1, 2, 3, 4, 5, 6, 7, 8, 9]	00:02:16	75.69.15.187					1	2003	7	0	#NULL!	#NULL!	#NULL!	#NULL!	#NULL!	#NULL!	#NULL!	0	3	3	2	3	2	3	2	4	3	2	2	2	2	2	2	2	1
sz76cnt5wq0mu8ux8mdnaokhu636d5ib	1	24851181	en	2014/11/24 2:20:39 PM	2014/11/24 2:27:59 PM	Minnesota	Firefox	Other		sample-provider=Cint&respondent=d1d10647-3aeb-4846-aa1f-f117fcaebcfe	http://s.cint.com/Survey/Fingerprint/d1d10647-3aeb-4846-aa1f-f117fcaebcfe		2101.0	[1, 2, 3, 4, 5, 6, 7, 8, 9]	00:07:18	68.112.154.220					0	2003	5	0	#NULL!	#NULL!	#NULL!	#NULL!	#NULL!	#NULL!	#NULL!	0	2	0	0	0	1	1	4	0	0	0	0	0	0	1	1	0	5
vqskuu558f790lyqt43f3emqyoirci3x	1	24813365	en	2014/11/24 7:34:55 AM	2014/11/24 7:40:26 AM	Georgia	Firefox	Other		sample-provider=Cint&respondent=dd555c55-1014-4ca3-b9b8-f03ae9eb1653	http://s.cint.com/Survey/Fingerprint/dd555c55-1014-4ca3-b9b8-f03ae9eb1653		2106.0	[1, 2, 3, 4, 5, 6, 7, 8, 9]	00:05:31	75.91.65.11					0	2003	11	0	#NULL!	#NULL!	#NULL!	#NULL!	#NULL!	#NULL!	#NULL!	0	3	1	0	0	0	0	1	0	0	0	0	0	0	0	0	0	3
yaqlkno6s11qe8a53lv81etgzz2trlho	1	24843455	en	2014/11/24 12:56:11 PM	2014/11/24 1:04:21 PM	Pennsylvania	Firefox	Other		sample-provider=Cint&respondent=74d7649c-cfd3-48e8-b4be-1abdb46aef66	http://s.cint.com/Survey/Fingerprint/74d7649c-cfd3-48e8-b4be-1abdb46aef66		2106.0	[1, 2, 3, 4, 5, 6, 7, 8, 9]	00:08:10	67.235.9.50					0	2004	12	0	#NULL!	#NULL!	#NULL!	#NULL!	#NULL!	#NULL!	#NULL!	0	1	1	1	0	0	0	1	0	0	1	0	0	0	0	0	2	2
lezffswipc4nudx8t3k8i64dlwi12zf1	1	24813411	en	2014/11/24 7:35:53 AM	2014/11/24 7:42:13 AM	Georgia	Safari	iPhone/iPod		sample-provider=Cint&respondent=1f666a8e-f3d7-4102-9e18-42419fca822c	http://s.cint.com/Survey/Fingerprint/1f666a8e-f3d7-4102-9e18-42419fca822c		2092.0	[1, 2, 3, 4, 5, 6, 7, 8, 9]	00:06:20	50.96.69.240					0	2005	10	0	#NULL!	#NULL!	#NULL!	#NULL!	#NULL!	#NULL!	#NULL!	0	2	1	1	0	1	1	1	0	0	1	0	0	0	0	0	0	3
qadwb4yfn050mophftw135qmqh2bwqtj	1	24816971	en	2014/11/24 8:43:51 AM	2014/11/24 9:09:10 AM	Maine	Firefox	Other		sample-provider=Cint&respondent=9b4fb535-d18c-4748-af99-7c0f94079a52	http://s.cint.com/Survey/Fingerprint/9b4fb535-d18c-4748-af99-7c0f94079a52		2120.0	[1, 2, 3, 4, 5, 6, 7, 8, 9]	00:25:18	72.65.116.149					0	2006	3	0	#NULL!	#NULL!	#NULL!	#NULL!	#NULL!	#NULL!	#NULL!	1	3	2	3	3	3	3	3	0	0	2	2	2	1	1	1	1	1
b7p53vc7s28zk2xvnoq3lo6s57sw1xrb	1	24817637	en	2014/11/24 8:55:21 AM	2014/11/24 9:08:15 AM	Georgia	Google Chrome	Android		sample-provider=Cint&respondent=e3d12ff7-6b6e-478a-bc44-71bfab471001	http://s.cint.com/Survey/Fingerprint/e3d12ff7-6b6e-478a-bc44-71bfab471001?sq=1		2102.0	[1, 2, 3, 4, 5, 6, 7, 8, 9]	00:12:52	76.17.75.21					1	2003	10	0	#NULL!	#NULL!	#NULL!	#NULL!	#NULL!	#NULL!	#NULL!	0	5	2	1	0	2	0	0	0	0	2	0	2	0	0	0	1	3
fhjopij7oexyklszkqis9hz7ln1pzutq	1	24836447	en	2014/11/24 11:50:34 AM	2014/11/24 12:16:57 PM	United States	Google Chrome	Other		sample-provider=Cint&respondent=7fb35946-0e57-4c3b-856e-6f82ed32df95	http://s.cint.com/Survey/Fingerprint/7fb35946-0e57-4c3b-856e-6f82ed32df95?sq=1		2092.0	[1, 2, 3, 4, 5, 6, 7, 8, 9]	00:26:22	99.50.78.30					1	2007	5	0	#NULL!	#NULL!	#NULL!	#NULL!	#NULL!	#NULL!	#NULL!	0	0	0	0	0	0	0	0	0	0	0	0	0	0	0	0	0	0
drswpjbh01jdghodp4un6uue3ptiozo1	1	24881279	en	2014/11/24 9:57:28 PM	2014/11/24 10:03:23 PM	California	Safari	iPad		sample-provider=Cint&respondent=6f771bec-928e-4877-82f1-5e0eef4103f1	http://s.cint.com/Survey/Fingerprint/6f771bec-928e-4877-82f1-5e0eef4103f1		2094.0	[1, 2, 3, 4, 5, 6, 7, 8, 9]	00:05:54	71.105.17.236					1	2003	5	#NULL!	1	#NULL!	#NULL!	#NULL!	#NULL!	#NULL!	#NULL!	0	3	1	0	0	1	3	0	3	3	2	2	1	0	0	0	0	0
riqrj3e2q4cm5zdwcidax3k1k3205vh7	1	24846433	en	2014/11/24 1:28:50 PM	2014/11/24 1:33:17 PM	Virginia	Internet Explorer	Other		sample-provider=Cint&respondent=75f8d86b-6157-43f0-85cc-82fefd881af2	http://s.cint.com/Survey/Fingerprint/75f8d86b-6157-43f0-85cc-82fefd881af2?sq=1		2114.0	[1, 2, 3, 4, 5, 6, 7, 8, 9]	00:04:25	98.166.75.215					1	2006	12	#NULL!	#NULL!	2	#NULL!	#NULL!	#NULL!	#NULL!	#NULL!	0	3	1	2	0	2	4	1	0	0	0	0	2	2	0	0	2	2
w2gc0w5njhtb0sgnpxhhhg8uesvzdl3n	1	24825887	en	2014/11/24 10:08:21 AM	2014/11/24 10:11:34 AM	New York	Internet Explorer	Other		sample-provider=Cint&respondent=767cacb0-ca46-4bc3-b31b-f1a47657f323	http://s.cint.com/Survey/Fingerprint/767cacb0-ca46-4bc3-b31b-f1a47657f323?sq=1		2104.0	[1, 2, 3, 4, 5, 6, 7, 8, 9]	00:03:13	24.93.28.162					1	2006	1	0	#NULL!	#NULL!	#NULL!	4	#NULL!	#NULL!	#NULL!	0	1	1	1	1	1	1	1	0	0	0	0	0	0	0	0	0	5
e4d5pz1if8q6den79zelvt8xcszw1qfw	1	24859499	en	2014/11/24 4:02:50 PM	2014/11/24 4:09:57 PM	Virginia	Firefox	Other		sample-provider=Cint&respondent=89873138-9e97-4ad2-ab9e-65a3c1a450ee	http://s.cint.com/Survey/Fingerprint/89873138-9e97-4ad2-ab9e-65a3c1a450ee?sq=1		2109.0	[1, 2, 3, 4, 5, 6, 7, 8, 9]	00:07:06	100.4.55.180					0	2004	6	0	#NULL!	#NULL!	#NULL!	#NULL!	#NULL!	#NULL!	#NULL!	0	0	1	1	0	0	1	1	0	0	0	0	0	0	0	0	2	3
z2p5q4fqf3zp0v6kifjn9c9qqqkz39ua	1	24846341	en	2014/11/24 1:27:49 PM	2014/11/24 1:36:14 PM	Iowa	Google Chrome	Other		sample-provider=Cint&respondent=b208ea01-8e5d-4c01-9499-c8c940aa67ef	http://s.cint.com/Survey/Fingerprint/b208ea01-8e5d-4c01-9499-c8c940aa67ef?sq=1		2123.0	[1, 2, 3, 4, 5, 6, 7, 8, 9]	00:08:24	173.18.253.15					1	2007	9	0	#NULL!	#NULL!	#NULL!	#NULL!	#NULL!	#NULL!	#NULL!	0	2	0	1	0	1	2	1	0	0	2	1	1	0	0	0	4	3
wxmll7e2ohols1e0j5a92a6ktut92k2g	1	24851683	en	2014/11/24 2:27:17 PM	2014/11/24 2:34:25 PM	Pennsylvania	Internet Explorer	Other		sample-provider=Cint&respondent=0219329e-dc52-4357-a12b-eed3b95908d9	http://s.cint.com/Survey/Fingerprint/0219329e-dc52-4357-a12b-eed3b95908d9?sq=1		2094.0	[1, 2, 3, 4, 5, 6, 7, 8, 9]	00:07:07	71.126.121.3					1	2006	2	0	#NULL!	#NULL!	#NULL!	#NULL!	#NULL!	#NULL!	#NULL!	0	0	0	0	0	0	0	0	0	0	0	0	0	1	2	1	2	3
3kjpipgz3ua9u2rup8axpl547ebqaepf	1	24817209	en	2014/11/24 8:48:02 AM	2014/11/24 8:57:37 AM	Georgia	Google Chrome	Other		sample-provider=Cint&respondent=9da333f9-3eb1-4880-8305-c403f63c39d1	http://s.cint.com/Survey/Fingerprint/9da333f9-3eb1-4880-8305-c403f63c39d1		2118.0	[1, 2, 3, 4, 5, 6, 7, 8, 9]	00:09:34	72.54.129.210					1	2007	7	0	#NULL!	#NULL!	#NULL!	#NULL!	#NULL!	#NULL!	#NULL!	0	3	1	3	1	1	4	1	2	0	1	1	1	1	1	1	1	4
lefa8w02qu2u4cl9ife7hts818la1c21	1	24818747	en	2014/11/24 9:08:03 AM	2014/11/24 9:13:00 AM	Michigan	Internet Explorer	Other		sample-provider=Cint&respondent=735a52b7-8377-4c86-8ebb-f6b1f06ccf8a	http://s.cint.com/Survey/Fingerprint/735a52b7-8377-4c86-8ebb-f6b1f06ccf8a?sq=1		2084.0	[1, 2, 3, 4, 5, 6, 7, 8, 9]	00:04:56	69.14.139.4					1	2004	2	0	#NULL!	#NULL!	#NULL!	#NULL!	#NULL!	#NULL!	#NULL!	0	2	1	2	0	1	0	1	0	0	1	0	0	0	0	1	0	3
iu3h9yto0tv5od2r9dmi30f5ygheqiln	1	24813339	en	2014/11/24 7:34:27 AM	2014/11/24 7:39:17 AM	Texas	Safari	iPad		sample-provider=Cint&respondent=bead7a1b-689b-4bcd-bccc-9bd7214c96b5	http://s.cint.com/Survey/Fingerprint/bead7a1b-689b-4bcd-bccc-9bd7214c96b5?sq=1		2100.0	[1, 2, 3, 4, 5, 6, 7, 8, 9]	00:04:49	99.190.211.10					1	2006	6	0	1	#NULL!	#NULL!	#NULL!	#NULL!	#NULL!	#NULL!	0	2	0	1	1	1	1	2	0	0	0	0	0	0	0	0	2	4
c9ck0x1lwpuy61o16eid9wiikrw7fhoj	1	24815323	en	2014/11/24 8:12:55 AM	2014/11/24 8:18:16 AM	Georgia	Google Chrome	Android		sample-provider=Cint&respondent=e976a04f-8584-4d94-91e8-fc62da3918bb	http://s.cint.com/Survey/Fingerprint/e976a04f-8584-4d94-91e8-fc62da3918bb		2097.0	[1, 2, 3, 4, 5, 6, 7, 8, 9]	00:05:20	50.167.101.207					0	2004	11	0	#NULL!	#NULL!	#NULL!	#NULL!	#NULL!	#NULL!	#NULL!	0	2	2	1	1	1	0	1	1	1	1	0	0	0	0	0	0	0
i7i9ujn99ynwpkcd0wllaqzxhprkeqjo	1	24847025	en	2014/11/24 1:34:41 PM	2014/11/24 1:41:49 PM	New Jersey	Internet Explorer	Other		sample-provider=Cint&respondent=c57acc7a-0a39-453c-b89b-698f406be7ca	http://s.cint.com/Survey/Fingerprint/c57acc7a-0a39-453c-b89b-698f406be7ca?sq=1		2097.0	[1, 2, 3, 4, 5, 6, 7, 8, 9]	00:07:08	198.23.5.73					1	2004	7	0	#NULL!	#NULL!	#NULL!	#NULL!	#NULL!	#NULL!	#NULL!	0	2	1	0	0	1	3	0	0	0	1	0	0	0	0	0	2	3
b12pnc3qno0e4wsj6z79dg7jve8843wq	1	24829873	en	2014/11/24 10:49:14 AM	2014/11/24 10:53:28 AM	Florida	Internet Explorer	Other		sample-provider=Cint&respondent=971062d4-62dc-4b51-8f21-102de621ca6d	http://s.cint.com/Survey/Fingerprint/971062d4-62dc-4b51-8f21-102de621ca6d?sq=1		2100.0	[1, 2, 3, 4, 5, 6, 7, 8, 9]	00:04:13	168.221.157.221					1	2004	11	#NULL!	1	#NULL!	#NULL!	#NULL!	#NULL!	#NULL!	#NULL!	0	2	0	0	0	2	0	0	0	0	0	0	1	0	0	0	0	5
yml7itkalhbpam4ijiwigby01lcvgsvo	1	24875197	en	2014/11/24 8:15:32 PM	2014/11/24 8:22:54 PM	Florida	Internet Explorer	Other		sample-provider=Cint&respondent=1b8c43f4-082c-4fc3-a1c2-9d6ca237c382	http://s.cint.com/Survey/Fingerprint/1b8c43f4-082c-4fc3-a1c2-9d6ca237c382?sq=1		2114.0	[1, 2, 3, 4, 5, 6, 7, 8, 9]	00:07:22	66.177.148.215					1	2004	10	0	#NULL!	#NULL!	#NULL!	#NULL!	#NULL!	#NULL!	#NULL!	0	2	2	2	0	0	5	0	0	0	2	0	0	0	0	0	2	4
wi1ucnffo4erqtnq3zol63bnbrjche1z	1	24850441	en	2014/11/24 2:10:19 PM	2014/11/24 2:21:24 PM	California	Google Chrome	Other		sample-provider=Cint&respondent=cbc89ea8-36e1-474b-9b4d-74a9a30e56e8	http://s.cint.com/Survey/Fingerprint/cbc89ea8-36e1-474b-9b4d-74a9a30e56e8?sq=1		2115.0	[1, 2, 3, 4, 5, 6, 7, 8, 9]	00:11:04	76.201.61.196					1	2007	7	#NULL!	#NULL!	#NULL!	#NULL!	4	#NULL!	#NULL!	#NULL!	0	1	1	2	2	1	4	1	0	0	1	0	5	1	1	2	0	2
4ui5u8ig8u6d3upfh9vz0hcr3rf7dsa9	1	24813651	en	2014/11/24 7:40:58 AM	2014/11/24 7:50:16 AM	Ohio	Google Chrome	Other		sample-provider=Cint&respondent=dfde23da-4010-4e6f-9219-16fcceb057f6	http://s.cint.com/Survey/Fingerprint/dfde23da-4010-4e6f-9219-16fcceb057f6		2096.0	[1, 2, 3, 4, 5, 6, 7, 8, 9]	00:09:17	184.57.67.55					1	2005	8	0	#NULL!	#NULL!	#NULL!	#NULL!	#NULL!	#NULL!	#NULL!	0	1	0	0	0	0	0	0	0	1	1	0	0	2	1	1	0	2
3bowbp4y3f5nzbyuazhk9y1nzanmbifb	1	24837591	en	2014/11/24 12:00:56 PM	2014/11/24 12:09:16 PM	Pennsylvania	Firefox	Other		sample-provider=Cint&respondent=bb160bbc-0e90-4cae-8edc-7b8b0e4d838b	http://s.cint.com/Survey/Fingerprint/bb160bbc-0e90-4cae-8edc-7b8b0e4d838b		2107.0	[1, 2, 3, 4, 5, 6, 7, 8, 9]	00:08:18	72.72.244.35					1	2003	12	0	#NULL!	#NULL!	#NULL!	#NULL!	#NULL!	#NULL!	#NULL!	0	1	0	0	0	0	1	1	0	0	2	0	2	0	0	0	0	2
5508ddssyw00ss2eky80kdyss6axiuwe	1	24822457	en	2014/11/24 9:42:53 AM	2014/11/24 2:34:36 PM	North Carolina	Internet Explorer	Other		sample-provider=Cint&respondent=cb8f7366-01db-4684-83ef-411a1d217971	http://s.cint.com/Survey/Fingerprint/cb8f7366-01db-4684-83ef-411a1d217971		2121.0	[1, 2, 3, 4, 5, 6, 7, 8, 9]	04:51:43	192.231.130.1					0	2007	12	0	#NULL!	#NULL!	#NULL!	#NULL!	#NULL!	#NULL!	#NULL!	0	3	0	0	0	0	4	2	0	0	0	0	0	0	0	0	2	2
02nif7k2oljq4l06fq87fe8wemrf4d6s	1	24837527	en	2014/11/24 12:00:11 PM	2014/11/24 12:08:10 PM	South Carolina	Firefox	Other		sample-provider=Cint&respondent=5aed9262-1424-4d09-858f-5773e5273312	http://s.cint.com/Survey/Fingerprint/5aed9262-1424-4d09-858f-5773e5273312?sq=1		2082.0	[1, 2, 3, 4, 5, 6, 7, 8, 9]	00:07:58	173.227.255.154					1	2005	7	0	#NULL!	#NULL!	#NULL!	#NULL!	#NULL!	#NULL!	#NULL!	0	2	2	0	3	0	0	0	0	0	0	0	0	0	0	0	1	3
mt4vgaagtk93y72twc4p4gjekuhlxqig	1	24804267	en	2014/11/24 4:54:38 AM	2014/11/24 5:02:19 AM	California	Safari	Android		sample-provider=Cint&respondent=f24ed428-adae-4270-bfa5-829eca92ca30	http://s.cint.com/Survey/Fingerprint/f24ed428-adae-4270-bfa5-829eca92ca30		2136.0	[1, 2, 3, 4, 5, 6, 7, 8, 9]	00:07:40	172.56.39.54					0	2005	1	0	1	#NULL!	3	#NULL!	#NULL!	#NULL!	#NULL!	0	2	2	5	1	0	0	3	0	0	2	1	0	2	0	2	0	0
my05nm46gmvev0q9kivjabpclyffmgf1	1	24864873	en	2014/11/24 5:23:07 PM	2014/11/24 5:26:28 PM	United States	Opera	Other		sample-provider=Cint&respondent=66964789-c302-4acf-bbd3-c122b112004c	http://s.cint.com/Survey/Fingerprint/66964789-c302-4acf-bbd3-c122b112004c?sq=1		2191.0	[1, 2, 3, 4, 5, 6, 7, 8, 9]	00:03:20	172.191.18.53					1	2007	2	0	#NULL!	#NULL!	#NULL!	#NULL!	#NULL!	#NULL!	#NULL!	0	4	4	5	5	4	4	4	3	4	3	4	4	5	5	5	5	5
vdbf5jkpvoc994iv7e646pfiy19bgrn0	1	24821723	en	2014/11/24 9:35:02 AM	2014/11/24 9:44:55 AM	Iowa	Safari	Android		sample-provider=Cint&respondent=659125bf-1f79-4483-921a-83cfff3d4e6d	http://s.cint.com/Survey/Fingerprint/659125bf-1f79-4483-921a-83cfff3d4e6d		2120.0	[1, 2, 3, 4, 5, 6, 7, 8, 9]	00:09:53	67.3.88.32					1	2005	1	#NULL!	#NULL!	#NULL!	#NULL!	4	#NULL!	#NULL!	#NULL!	0	2	2	1	1	1	1	1	0	0	0	0	0	0	0	0	1	2
hi0yj5k7t3ilvyao5964f720kpvi7xvu	1	24841785	en	2014/11/24 12:37:25 PM	2014/11/24 12:52:27 PM	United States	Google Chrome	Android		sample-provider=Cint&respondent=63c97ef0-bea9-4a62-b362-0c9a0062135f	http://s.cint.com/Survey/Fingerprint/63c97ef0-bea9-4a62-b362-0c9a0062135f		2126.0	[1, 2, 3, 4, 5, 6, 7, 8, 9]	00:15:01	172.56.20.216					1	2005	11	#NULL!	#NULL!	2	#NULL!	#NULL!	#NULL!	#NULL!	#NULL!	0	0	0	0	0	5	0	3	0	2	0	0	3	2	0	0	0	3
fi7wav5snbc2ph33i6o45brpnc4ym5ey	1	24826269	en	2014/11/24 10:12:32 AM	2014/11/24 10:55:27 AM	Pennsylvania	Internet Explorer	Other		sample-provider=Cint&respondent=9de7de3c-b947-481f-b098-65267830377a	http://s.cint.com/Survey/Fingerprint/9de7de3c-b947-481f-b098-65267830377a?sq=1		2114.0	[1, 2, 3, 4, 5, 6, 7, 8, 9]	00:42:53	69.242.13.127					0	2005	2	0	#NULL!	#NULL!	#NULL!	#NULL!	#NULL!	#NULL!	#NULL!	0	0	0	2	0	0	0	1	0	0	2	0	0	0	0	0	0	3
6m9k7ckyy7xiz6e6gmkf8zm1zic0jpiy	1	24877913	en	2014/11/24 9:01:27 PM	2014/11/24 9:08:34 PM	New York	Google Chrome	Other		sample-provider=Cint&respondent=fc2df635-243a-4f88-8c48-bb0816573a56	http://s.cint.com/Survey/Fingerprint/fc2df635-243a-4f88-8c48-bb0816573a56?sq=1		2123.0	[1, 2, 3, 4, 5, 6, 7, 8, 9]	00:07:05	74.74.98.50					0	2006	12	0	#NULL!	#NULL!	#NULL!	#NULL!	#NULL!	#NULL!	#NULL!	0	4	2	0	0	1	1	3	0	0	0	0	1	0	0	0	2	4
27wzhwzfnrc55yu4wui5i0fsn3m1ml6u	1	24876093	en	2014/11/24 8:34:33 PM	2014/11/24 8:39:35 PM	Florida	Google Chrome	Other		sample-provider=Cint&respondent=ba54bca4-bf13-4e88-a668-57e647b9eddf	http://s.cint.com/Survey/Fingerprint/ba54bca4-bf13-4e88-a668-57e647b9eddf		2116.0	[1, 2, 3, 4, 5, 6, 7, 8, 9]	00:05:01	69.138.127.242					0	2003	3	0	#NULL!	#NULL!	#NULL!	#NULL!	#NULL!	#NULL!	#NULL!	0	4	2	2	0	2	2	2	0	0	3	0	2	0	0	0	2	3
98mkhthx1a2rbuavzhhscb4yi6nvv6x0	1	24815659	en	2014/11/24 8:18:32 AM	2014/11/24 8:28:14 AM	New York	Google Chrome	Android		sample-provider=Cint&respondent=cb6d3a27-01d0-44dc-9cd5-dd3dfc307e1d	http://s.cint.com/Survey/Fingerprint/cb6d3a27-01d0-44dc-9cd5-dd3dfc307e1d		2099.0	[1, 2, 3, 4, 5, 6, 7, 8, 9]	00:09:41	71.169.25.221					1	2004	1	0	#NULL!	#NULL!	#NULL!	#NULL!	#NULL!	#NULL!	#NULL!	0	3	2	0	0	2	0	2	0	0	1	0	0	0	0	0	2	4
gq1xq172146sl8fg25dzn41w5hej5o6z	1	24816583	en	2014/11/24 8:36:40 AM	2014/11/24 8:42:41 AM	New York	Google Chrome	Other		sample-provider=Cint&respondent=f5bccb7e-9e1a-485a-a6de-3294ce64ba50	http://s.cint.com/Survey/Fingerprint/f5bccb7e-9e1a-485a-a6de-3294ce64ba50		2095.0	[1, 2, 3, 4, 5, 6, 7, 8, 9]	00:06:01	72.10.222.24					1	2006	2	0	#NULL!	#NULL!	#NULL!	#NULL!	#NULL!	#NULL!	#NULL!	0	5	0	0	0	1	1	1	0	0	0	0	1	0	0	1	1	2
0ovoe8ygy1358rd6au6ul5a8t1wfa8ne	1	24868975	en	2014/11/24 6:49:18 PM	2014/11/24 6:56:49 PM	Washington	Firefox	Other		sample-provider=Cint&respondent=e210f93c-1133-4803-97a0-72e39caa21db	http://s.cint.com/Survey/Fingerprint/e210f93c-1133-4803-97a0-72e39caa21db?sq=1		2130.0	[1, 2, 3, 4, 5, 6, 7, 8, 9]	00:07:30	50.159.54.169					1	2007	4	0	#NULL!	#NULL!	#NULL!	#NULL!	#NULL!	#NULL!	#NULL!	1	0	0	2	2	1	3	1	0	0	0	0	0	0	0	0	0	3
5dss61q5mgl76wq2zmeiv8xu690ovdk8	1	24856251	en	2014/11/24 3:19:32 PM	2014/11/24 3:27:06 PM	New Jersey	Google Chrome	Other		sample-provider=Cint&respondent=3655e9f4-b21d-4bf5-92d6-fe0fea1630af	http://s.cint.com/Survey/Fingerprint/3655e9f4-b21d-4bf5-92d6-fe0fea1630af		2111.0	[1, 2, 3, 4, 5, 6, 7, 8, 9]	00:07:33	173.63.11.82					0	2003	6	0	#NULL!	#NULL!	#NULL!	#NULL!	#NULL!	#NULL!	#NULL!	0	3	3	1	1	1	1	3	0	0	0	0	0	0	0	0	3	2
b6gsmjlh2oewlgqb81pppk98nv8cah8s	1	24856119	en	2014/11/24 3:17:36 PM	2014/11/24 3:23:16 PM	Georgia	Google Chrome	Other		sample-provider=Cint&respondent=ed1b44e8-f4bd-4218-bae2-73daecc8dabf	http://s.cint.com/Survey/Fingerprint/ed1b44e8-f4bd-4218-bae2-73daecc8dabf?sq=1		2110.0	[1, 2, 3, 4, 5, 6, 7, 8, 9]	00:05:40	24.196.236.216					0	2006	1	0	#NULL!	#NULL!	#NULL!	#NULL!	#NULL!	#NULL!	#NULL!	0	3	2	0	0	3	0	1	0	0	2	0	0	0	0	0	0	4
v0cx8bhhyxxzgg2e8fixrjqr1edc8x8y	1	24855803	en	2014/11/24 3:13:58 PM	2014/11/24 3:18:11 PM	Iowa	Google Chrome	Other		sample-provider=Cint&respondent=78d9d59e-0c8e-4acb-b075-414d4d349b06	http://s.cint.com/Survey/Fingerprint/78d9d59e-0c8e-4acb-b075-414d4d349b06?sq=1		2116.0	[1, 2, 3, 4, 5, 6, 7, 8, 9]	00:04:12	173.27.76.109					0	2005	4	0	#NULL!	#NULL!	#NULL!	#NULL!	#NULL!	#NULL!	#NULL!	0	4	0	0	0	0	0	0	0	1	0	0	0	0	0	0	0	5
51yetksnqy7b71bgqsrkjysccz0x9ijk	1	24815533	en	2014/11/24 8:16:03 AM	2014/11/24 8:29:34 AM	South Carolina	Internet Explorer	Other		sample-provider=Cint&respondent=8a7f6631-52d1-48ac-9503-5edc0533ddb1	http://s.cint.com/Survey/Fingerprint/8a7f6631-52d1-48ac-9503-5edc0533ddb1		2115.0	[1, 2, 3, 4, 5, 6, 7, 8, 9]	00:13:30	98.25.59.25					1	2006	10	0	#NULL!	#NULL!	#NULL!	#NULL!	#NULL!	#NULL!	#NULL!	0	3	2	0	0	3	1	3	0	0	2	0	3	0	0	0	2	2
m1ljn7on0co7oky4feaq1igf1bbslpfc	1	24875067	en	2014/11/24 8:13:21 PM	2014/11/24 8:17:25 PM	United States	Google Chrome	Other		sample-provider=Cint&respondent=fc2f15b2-35d3-4bdd-9c35-fd7265e5a279	http://s.cint.com/Survey/Fingerprint/fc2f15b2-35d3-4bdd-9c35-fd7265e5a279?sq=1		2129.0	[1, 2, 3, 4, 5, 6, 7, 8, 9]	00:04:04	173.25.71.112					0	2005	1	0	#NULL!	#NULL!	#NULL!	#NULL!	#NULL!	#NULL!	#NULL!	0	3	2	1	3	4	4	3	0	0	1	2	1	1	2	0	0	3
13ohm9gy1q5vm9bes7uz41b6ayxl34b5	1	24844729	en	2014/11/24 1:12:11 PM	2014/11/24 1:19:26 PM	Minnesota	Firefox	Other		sample-provider=Cint&respondent=5f11df10-31de-4179-ab6c-50e452e66ef5	http://s.cint.com/Survey/Fingerprint/5f11df10-31de-4179-ab6c-50e452e66ef5		2094.0	[1, 2, 3, 4, 5, 6, 7, 8, 9]	00:07:15	50.33.32.64					1	2007	3	0	#NULL!	#NULL!	#NULL!	#NULL!	#NULL!	#NULL!	#NULL!	0	2	0	0	0	0	0	2	0	2	0	0	1	0	0	0	3	3
yg45bddv5307t71cwgtnx862agzeldfx	1	24873911	en	2014/11/24 7:50:09 PM	2014/11/24 7:57:15 PM	Maine	Google Chrome	Other		sample-provider=Cint&respondent=8fcb834d-ee6a-4743-802f-82557e2d459b	http://s.cint.com/Survey/Fingerprint/8fcb834d-ee6a-4743-802f-82557e2d459b?sq=1		2079.0	[1, 2, 3, 4, 5, 6, 7, 8, 9]	00:06:30	74.78.149.98					1	2007	5	0	#NULL!	#NULL!	#NULL!	#NULL!	#NULL!	#NULL!	#NULL!	1	2	0	1	0	1	1	1	0	0	0	0	0	0	0	0	0	3
weo9pyl5kbq2asegtptn8jdya1yorqk3	1	24829955	en	2014/11/24 10:49:53 AM	2014/11/24 10:54:53 AM	Virginia	Firefox	Other		sample-provider=Cint&respondent=2a4aef52-2065-482a-a577-6e843d257328	http://s.cint.com/Survey/Fingerprint/2a4aef52-2065-482a-a577-6e843d257328?sq=1		2118.0	[1, 2, 3, 4, 5, 6, 7, 8, 9]	00:04:58	173.73.69.18					1	2004	1	0	#NULL!	#NULL!	#NULL!	#NULL!	#NULL!	#NULL!	#NULL!	0	3	3	3	0	1	0	2	0	0	1	0	0	0	0	0	1	5
8np9nbjn8nyjvdmug0qkfmhlzla1y4w7	1	24857405	en	2014/11/24 3:33:33 PM	2014/11/24 3:36:53 PM	Washington	Google Chrome	Other		sample-provider=Cint&respondent=662192cc-0b08-4f6d-a33f-af0bcec03404	http://s.cint.com/Survey/Fingerprint/662192cc-0b08-4f6d-a33f-af0bcec03404?sq=1		2146.0	[1, 2, 3, 4, 5, 6, 7, 8, 9]	00:03:20	98.247.35.80					0	2007	5	#NULL!	#NULL!	#NULL!	#NULL!	4	#NULL!	#NULL!	#NULL!	0	3	2	4	2	4	1	3	4	3	2	3	2	1	2	2	2	3
uko641zrlfn899wv2szbqknvdzrv8apj	1	24832737	en	2014/11/24 11:15:19 AM	2014/11/24 11:20:18 AM	California	Google Chrome	Other		sample-provider=Cint&respondent=04f8ba57-4382-40e1-a714-fadd66fab6b8	http://s.cint.com/Survey/Fingerprint/04f8ba57-4382-40e1-a714-fadd66fab6b8		2123.0	[1, 2, 3, 4, 5, 6, 7, 8, 9]	00:04:58	71.254.128.104					1	2007	9	0	#NULL!	#NULL!	#NULL!	#NULL!	#NULL!	6	#NULL!	0	2	0	3	0	3	4	1	0	0	0	1	2	2	0	0	1	2
onrxp3pkg0nckjsxqga5qgmgo57vmgew	1	24878663	en	2014/11/24 9:12:05 PM	2014/11/24 9:35:26 PM	Colorado	Google Chrome	Other		sample-provider=Cint&respondent=109042bf-d878-4150-95d5-35ff8e8edad4	http://s.cint.com/Survey/Fingerprint/109042bf-d878-4150-95d5-35ff8e8edad4		2093.0	[1, 2, 3, 4, 5, 6, 7, 8, 9]	00:23:21	72.161.113.45					1	2007	7	0	#NULL!	#NULL!	#NULL!	#NULL!	#NULL!	#NULL!	#NULL!	0	3	1	0	0	2	0	2	0	0	0	0	0	0	0	0	0	2
k68s10yyztsbuwza3ivk2hefm765k6fh	1	24813127	en	2014/11/24 7:30:09 AM	2014/11/24 7:37:01 AM	Oregon	Google Chrome	Other		sample-provider=Cint&respondent=687cea2c-08a5-4601-9584-29a79f8c6bf4	http://s.cint.com/Survey/Fingerprint/687cea2c-08a5-4601-9584-29a79f8c6bf4		2111.0	[1, 2, 3, 4, 5, 6, 7, 8, 9]	00:06:52	97.120.78.49					1	2005	8	0	#NULL!	#NULL!	#NULL!	#NULL!	#NULL!	#NULL!	#NULL!	0	4	2	0	2	2	0	3	0	1	1	0	1	0	0	0	2	3
rms0x1hfj6hm2rqxzcgnizadq978bpba	1	24847641	en	2014/11/24 1:42:28 PM	2014/11/24 1:54:26 PM	Minnesota	Firefox	Other		sample-provider=Cint&respondent=182180fc-93eb-43fc-afb5-f8e96da9ff3b	http://s.cint.com/Survey/Fingerprint/182180fc-93eb-43fc-afb5-f8e96da9ff3b		2066.0	[1, 2, 3, 4, 5, 6, 7, 8, 9]	00:11:58	50.107.34.244					0	2005	1	0	#NULL!	#NULL!	#NULL!	#NULL!	#NULL!	#NULL!	#NULL!	0	2	0	0	0	0	0	2	0	0	0	0	0	0	0	0	0	4
ksu0mbrzuu1pgkwmryrj68h03uz2dxz8	1	24857373	en	2014/11/24 3:33:06 PM	2014/11/24 3:39:45 PM	New York	Internet Explorer	Other		sample-provider=Cint&respondent=8970ed8e-8cbe-4b55-8e7c-3d8f8f522994	http://s.cint.com/Survey/Fingerprint/8970ed8e-8cbe-4b55-8e7c-3d8f8f522994?sq=1		2106.0	[1, 2, 3, 4, 5, 6, 7, 8, 9]	00:06:39	165.254.130.2					1	2007	2	0	#NULL!	#NULL!	#NULL!	#NULL!	#NULL!	#NULL!	#NULL!	0	2	0	0	0	2	3	0	0	0	0	0	2	0	0	0	2	2
iipzwtj77uu7xr5nnfuewjeyhvylleil	1	24816877	en	2014/11/24 8:42:11 AM	2014/11/24 9:15:30 AM	Florida	Google Chrome	Other		sample-provider=Cint&respondent=07785d2f-8117-4176-85b6-d3b384ab8baf	http://s.cint.com/Survey/Fingerprint/07785d2f-8117-4176-85b6-d3b384ab8baf?sq=1		2093.0	[1, 2, 3, 4, 5, 6, 7, 8, 9]	00:33:19	50.88.161.110					1	2005	1	0	#NULL!	#NULL!	#NULL!	#NULL!	#NULL!	#NULL!	#NULL!	1	2	1	0	0	1	3	3	0	0	0	0	0	0	0	0	4	2
dnq6myh2zwordaqnebxxl7oycdw7bj4r	1	24814079	en	2014/11/24 7:49:54 AM	2014/11/24 7:58:11 AM	Missouri	Google Chrome	Other		sample-provider=Cint&respondent=dd8c2f74-a89e-4fbb-95fc-ef1028191a0e	http://s.cint.com/Survey/Fingerprint/dd8c2f74-a89e-4fbb-95fc-ef1028191a0e		2093.0	[1, 2, 3, 4, 5, 6, 7, 8, 9]	00:08:16	99.66.189.251					0	2007	1	0	#NULL!	#NULL!	#NULL!	#NULL!	#NULL!	#NULL!	#NULL!	0	1	1	0	0	1	0	1	0	0	0	0	0	0	0	0	4	3
jwxpi26k8mi39ou9pcj9682vvmtirxyi	1	24883667	en	2014/11/24 11:14:50 PM	2014/11/24 11:24:08 PM	United States	Safari	iPad		sample-provider=Cint&respondent=65bb8403-3d7f-4f91-96eb-108d16af97f4	http://s.cint.com/Survey/Fingerprint/65bb8403-3d7f-4f91-96eb-108d16af97f4?sq=1		2096.0	[1, 2, 3, 4, 5, 6, 7, 8, 9]	00:09:18	100.34.67.50					0	2003	4	0	#NULL!	#NULL!	#NULL!	#NULL!	#NULL!	#NULL!	#NULL!	0	2	1	0	0	1	0	1	0	0	1	0	1	0	0	0	0	5
un3fxz50s7selshd5yy3tnq1kr2gnsn7	1	24821113	en	2014/11/24 9:29:35 AM	2014/11/24 9:35:39 AM	Missouri	Firefox	Other		sample-provider=Cint&respondent=01a1beae-3bb9-43f3-acad-a2a35eca7b8d	http://s.cint.com/Survey/Fingerprint/01a1beae-3bb9-43f3-acad-a2a35eca7b8d		2098.0	[1, 2, 3, 4, 5, 6, 7, 8, 9]	00:06:04	173.218.46.135					1	2005	3	0	#NULL!	#NULL!	#NULL!	#NULL!	#NULL!	#NULL!	#NULL!	0	3	2	0	2	2	2	1	0	0	2	3	2	2	0	2	2	4
dvugq6la36yg9z9lq2e414zk3m1fxsld	1	24845569	en	2014/11/24 1:22:36 PM	2014/11/24 1:33:29 PM	Alabama	Google Chrome	Other		sample-provider=Cint&respondent=0f26c4e2-e422-4d2d-86d6-aebabce0b98a	http://s.cint.com/Survey/Fingerprint/0f26c4e2-e422-4d2d-86d6-aebabce0b98a		2094.0	[1, 2, 3, 4, 5, 6, 7, 8, 9]	00:10:53	173.21.150.250					1	2003	5	0	#NULL!	#NULL!	#NULL!	#NULL!	#NULL!	#NULL!	#NULL!	1	2	0	0	0	1	0	0	0	0	0	0	0	0	0	0	3	1
60r85bfb7eh9y0a8i4s8ijrjpqicqj2a	1	24841975	en	2014/11/24 12:39:43 PM	2014/11/24 12:47:39 PM	Georgia	Internet Explorer	Other		sample-provider=Cint&respondent=f4470ca2-47d2-4575-ad8a-931a861899e3	http://s.cint.com/Survey/Fingerprint/f4470ca2-47d2-4575-ad8a-931a861899e3?sq=1		2127.0	[1, 2, 3, 4, 5, 6, 7, 8, 9]	00:07:55	173.165.178.133					1	2006	12	0	#NULL!	#NULL!	#NULL!	#NULL!	#NULL!	#NULL!	#NULL!	0	5	5	0	0	5	0	5	0	0	5	1	1	0	0	0	2	5
yrduzfwop1xxpaly4mosxblgbykam3pp	1	24832585	en	2014/11/24 11:13:42 AM	2014/11/24 11:17:14 AM	Virginia	Firefox	Other		sample-provider=Cint&respondent=6b7018c5-9ff5-467b-a8de-f2e451f26b3c	http://s.cint.com/Survey/Fingerprint/6b7018c5-9ff5-467b-a8de-f2e451f26b3c?sq=1		2067.0	[1, 2, 3, 4, 5, 6, 7, 8, 9]	00:03:32	96.233.216.187					1	2005	4	0	#NULL!	#NULL!	#NULL!	#NULL!	#NULL!	#NULL!	#NULL!	0	3	1	0	0	0	0	0	0	0	2	0	0	0	0	0	0	2
4n7nnmzaypglhfstwwhyjrb48z4gxs1m	1	24887895	en	2014/11/25 1:04:46 AM	2014/11/25 1:13:56 AM	California	Firefox	Other		sample-provider=Cint&respondent=d986c0b2-664e-49dc-9174-d42057b2fa62	http://s.cint.com/Survey/Fingerprint/d986c0b2-664e-49dc-9174-d42057b2fa62?sq=1		2181.0	[1, 2, 3, 4, 5, 6, 7, 8, 9]	00:09:08	107.181.225.155					1	2004	10	#NULL!	1	#NULL!	#NULL!	#NULL!	#NULL!	#NULL!	#NULL!	0	5	3	4	2	5	4	3	4	4	3	3	4	4	2	3	3	5
ixb4uqobfq4ta6cnmtok4x9kmrg4o4ey	1	24815281	en	2014/11/24 8:12:03 AM	2014/11/24 8:18:25 AM	Missouri	Safari	iPhone/iPod		sample-provider=Cint&respondent=54f22a6d-56d6-4ed8-afcb-a40a7e325c7a	http://s.cint.com/Survey/Fingerprint/54f22a6d-56d6-4ed8-afcb-a40a7e325c7a?sq=1		2127.0	[1, 2, 3, 4, 5, 6, 7, 8, 9]	00:06:21	71.81.144.51					0	2003	2	0	#NULL!	#NULL!	#NULL!	#NULL!	#NULL!	#NULL!	#NULL!	0	5	2	0	0	0	2	1	0	0	2	0	0	0	0	0	2	4
wka8ine9kc7goif1alqgx5thdzn0jegx	1	24848113	en	2014/11/24 1:47:06 PM	2014/11/24 1:54:42 PM	Illinois	Google Chrome	Android		sample-provider=Cint&respondent=f2e90c0b-6440-42aa-8b65-28d31e26eb24	http://s.cint.com/Survey/Fingerprint/f2e90c0b-6440-42aa-8b65-28d31e26eb24?sq=1		2147.0	[1, 2, 3, 4, 5, 6, 7, 8, 9]	00:07:35	98.214.116.51					1	2003	5	#NULL!	#NULL!	2	#NULL!	#NULL!	#NULL!	#NULL!	#NULL!	0	5	5	0	0	3	0	2	2	2	5	2	2	5	0	0	2	4
kuxpiqrimifly7rji6mfv5fouu0t074h	1	24867609	en	2014/11/24 6:19:38 PM	2014/11/24 6:25:39 PM	Virginia	Google Chrome	Other		sample-provider=Cint&respondent=353cebcb-ac3d-45eb-b208-9e3e2fd83baa	http://s.cint.com/Survey/Fingerprint/353cebcb-ac3d-45eb-b208-9e3e2fd83baa		2119.0	[1, 2, 3, 4, 5, 6, 7, 8, 9]	00:06:00	98.166.3.189					0	2005	7	#NULL!	#NULL!	2	#NULL!	#NULL!	#NULL!	#NULL!	#NULL!	0	3	2	2	0	0	0	0	5	5	1	0	0	0	0	0	0	4
gvknhc54k5sf45ah83pfzho02ayzt98p	1	24882027	en	2014/11/24 10:24:39 PM	2014/11/24 10:32:46 PM	Ohio	Firefox	Other		sample-provider=Cint&respondent=34bc1f70-7200-4958-abee-a63d797cf12d	http://s.cint.com/Survey/Fingerprint/34bc1f70-7200-4958-abee-a63d797cf12d?sq=1		2119.0	[1, 2, 3, 4, 5, 6, 7, 8, 9]	00:08:06	65.185.38.20					0	2003	3	0	#NULL!	2	3	#NULL!	#NULL!	#NULL!	#NULL!	0	1	2	2	1	0	3	2	2	2	2	0	2	1	0	0	2	4
16dl8bq3rb9axjgwlqhvq9eyyh5outgs	1	24828123	en	2014/11/24 10:32:09 AM	2014/11/24 10:38:23 AM	United States	Internet Explorer	Other		sample-provider=Cint&respondent=05c67158-a664-40e2-879a-dec97f8bc00a	http://queensu.fluidsurveys.com/surveys/dr-janssen/parental-influence-and-active-play-1/?sample-provider=Cint&respondent=05c67158-a664-40e2-879a-dec97f8bc00a		2121.0	[1, 2, 3, 4, 5, 6, 7, 8, 9]	00:06:12	12.15.146.127					1	2007	12	0	#NULL!	#NULL!	#NULL!	#NULL!	#NULL!	#NULL!	#NULL!	0	5	3	0	0	3	1	1	0	0	1	0	0	1	0	0	2	2
kiji93jaenvj5wnkdimwf22bwwjk6fiv	1	24815917	en	2014/11/24 8:23:31 AM	2014/11/24 8:30:02 AM	Missouri	Google Chrome	Android		sample-provider=Cint&respondent=b27209aa-675e-4d06-b9f5-14ca3c3f90e5	http://s.cint.com/Survey/Fingerprint/b27209aa-675e-4d06-b9f5-14ca3c3f90e5		2120.0	[1, 2, 3, 4, 5, 6, 7, 8, 9]	00:06:29	63.137.150.235					0	2004	1	0	1	#NULL!	#NULL!	#NULL!	#NULL!	#NULL!	#NULL!	1	4	1	2	0	2	3	1	4	3	2	0	1	0	0	0	0	2
k61x687bzmn19mwxse45u14uxrp8lp4n	1	24867203	en	2014/11/24 6:10:42 PM	2014/11/24 6:24:00 PM	California	Google Chrome	Other		sample-provider=Cint&respondent=f5ad7651-570b-4ffe-b7dc-a3e9d2ac0a4f	http://s.cint.com/Survey/Fingerprint/f5ad7651-570b-4ffe-b7dc-a3e9d2ac0a4f?sq=1		2131.0	[1, 2, 3, 4, 5, 6, 7, 8, 9]	00:13:18	108.184.30.19					1	2004	6	0	#NULL!	#NULL!	#NULL!	#NULL!	#NULL!	#NULL!	#NULL!	0	5	5	0	0	2	1	1	0	0	5	0	2	1	0	0	2	5
r223i0cb15a9bptbfqqnup6nr7znika3	1	24824891	en	2014/11/24 9:57:15 AM	2014/11/24 10:01:20 AM	Idaho	Safari	Other		sample-provider=Cint&respondent=e5a6f3ae-74fe-43c6-8afc-da688a185f49	http://s.cint.com/Survey/Fingerprint/e5a6f3ae-74fe-43c6-8afc-da688a185f49		2132.0	[1, 2, 3, 4, 5, 6, 7, 8, 9]	00:04:04	76.178.187.76					0	2006	9	0	#NULL!	#NULL!	#NULL!	#NULL!	#NULL!	#NULL!	#NULL!	0	3	3	4	1	2	2	3	0	0	5	0	0	1	0	0	2	2
5an29slbhk7lhu9emrgti0xzgvghe9s4	1	24826247	en	2014/11/24 10:12:20 AM	2014/11/24 10:14:52 AM	United States	Firefox	Other		sample-provider=Cint&respondent=0a693213-329a-4450-9165-c6837cdfbb4a	http://s.cint.com/Survey/Fingerprint/0a693213-329a-4450-9165-c6837cdfbb4a?sq=1		2165.0	[1, 2, 3, 4, 5, 6, 7, 8, 9]	00:02:31	67.8.3.225					1	2004	3	0	#NULL!	#NULL!	#NULL!	#NULL!	#NULL!	#NULL!	#NULL!	2	3	4	3	4	4	3	3	4	3	4	3	4	3	3	2	2	3
v2mmxp427v26nm9paiw6loumdt9ddl76	1	24827985	en	2014/11/24 10:30:28 AM	2014/11/24 11:02:48 AM	Rhode Island	Internet Explorer	Other		sample-provider=Cint&respondent=a7a68f61-ef92-4ef6-a40a-4b9946cb94cc	http://s.cint.com/Survey/Fingerprint/a7a68f61-ef92-4ef6-a40a-4b9946cb94cc		2120.0	[1, 2, 3, 4, 5, 6, 7, 8, 9]	00:32:20	174.78.133.44					0	2005	11	0	1	#NULL!	#NULL!	#NULL!	#NULL!	#NULL!	#NULL!	0	4	2	0	1	1	0	3	0	0	1	0	1	1	0	0	3	3
r57inw5guoou96sz7klbe686iybi90qt	1	24842417	en	2014/11/24 12:45:33 PM	2014/11/24 12:51:59 PM	Utah	Google Chrome	Other		sample-provider=Cint&respondent=86e0fd82-29cf-4ec7-b3a7-9d8e25846f7a	http://s.cint.com/Survey/Fingerprint/86e0fd82-29cf-4ec7-b3a7-9d8e25846f7a		2107.0	[1, 2, 3, 4, 5, 6, 7, 8, 9]	00:06:26	67.136.48.142					1	2005	1	0	#NULL!	#NULL!	#NULL!	#NULL!	#NULL!	#NULL!	#NULL!	1	2	0	0	0	0	0	0	0	0	1	0	2	0	0	0	0	3
dm9fy4uk5ncglbgaq342nxwtsa3x6aqj	1	24838455	en	2014/11/24 12:08:19 PM	2014/11/24 12:12:34 PM	Missouri	Internet Explorer	Other		sample-provider=Cint&respondent=7db26b2d-31c4-4665-a232-b5cbdc340587	http://s.cint.com/Survey/Fingerprint/7db26b2d-31c4-4665-a232-b5cbdc340587		2124.0	[1, 2, 3, 4, 5, 6, 7, 8, 9]	00:04:14	69.242.150.83					1	2007	8	0	#NULL!	#NULL!	#NULL!	#NULL!	#NULL!	#NULL!	#NULL!	2	3	1	0	0	4	0	2	0	0	0	0	0	1	0	0	1	5
ypaqgmvp1agpbtjgybqvtbgunzh3i9xs	1	24835643	en	2014/11/24 11:43:58 AM	2014/11/24 11:58:25 AM	Missouri	Firefox	Other		sample-provider=Cint&respondent=0cd512d0-7e2e-4141-b213-d417b5557e35	http://s.cint.com/Survey/Fingerprint/0cd512d0-7e2e-4141-b213-d417b5557e35?sq=1		2114.0	[1, 2, 3, 4, 5, 6, 7, 8, 9]	00:14:26	74.61.211.24					1	2007	8	0	#NULL!	#NULL!	#NULL!	#NULL!	#NULL!	#NULL!	#NULL!	0	2	1	2	0	0	2	0	3	3	2	0	0	0	0	0	2	3
o7sl0t2kzodeb98k5qdukz9fd56mu5lq	1	24852979	en	2014/11/24 2:41:25 PM	2014/11/24 2:46:36 PM	Arizona	Google Chrome	Other		sample-provider=Cint&respondent=f290e348-f9bd-403e-b88f-f2c58dd9e1f8	http://s.cint.com/Survey/Fingerprint/f290e348-f9bd-403e-b88f-f2c58dd9e1f8?sq=1		2135.0	[1, 2, 3, 4, 5, 6, 7, 8, 9]	00:05:10	67.1.239.250					0	2007	9	0	#NULL!	#NULL!	#NULL!	#NULL!	#NULL!	#NULL!	#NULL!	0	5	2	0	0	2	0	5	5	5	3	1	2	5	0	2	0	3
tvmxa2d0etdhv7674do6ttan41gnrojj	1	24849195	en	2014/11/24 1:57:25 PM	2014/11/24 2:03:48 PM	United States	Internet Explorer	Windows Mobile		sample-provider=Cint&respondent=953bb0ec-018c-403d-b4a4-c18a3eca6c38	http://s.cint.com/Survey/Fingerprint/953bb0ec-018c-403d-b4a4-c18a3eca6c38		2157.0	[1, 2, 3, 4, 5, 6, 7, 8, 9]	00:06:22	166.137.246.87					1	2004	9	#NULL!	#NULL!	#NULL!	#NULL!	4	#NULL!	#NULL!	#NULL!	1	2	2	2	3	2	3	2	3	3	3	2	3	1	3	3	4	5
1473s52vjh0b3hcnvhqccmi6csg126o2	1	24883229	en	2014/11/24 11:00:17 PM	2014/11/24 11:08:10 PM	California	Safari	Other		sample-provider=Cint&respondent=f166e297-cc0a-4068-a595-4994fe81770b	http://s.cint.com/Survey/Fingerprint/f166e297-cc0a-4068-a595-4994fe81770b?sq=1		2105.0	[1, 2, 3, 4, 5, 6, 7, 8, 9]	00:07:53	69.108.160.113					1	2004	5	0	#NULL!	#NULL!	#NULL!	4	#NULL!	#NULL!	#NULL!	0	4	1	1	1	1	1	1	0	0	0	0	1	0	0	0	3	0
0e5r0n40kc10ya5szk7uwj5nepts3eiu	1	24870031	en	2014/11/24 7:14:17 PM	2014/11/24 7:22:48 PM	Michigan	Google Chrome	Android		sample-provider=Cint&respondent=a479effd-c714-4d30-9e96-caa3a67cd9f1	http://s.cint.com/Survey/Fingerprint/a479effd-c714-4d30-9e96-caa3a67cd9f1?sq=1		2098.0	[1, 2, 3, 4, 5, 6, 7, 8, 9]	00:08:31	71.86.187.45					1	2005	10	0	#NULL!	#NULL!	#NULL!	#NULL!	#NULL!	#NULL!	#NULL!	0	4	2	2	0	0	0	2	0	0	3	0	0	0	0	0	0	3
32nwn29qndoxgx28ncpafrczohj9velt	1	24842273	en	2014/11/24 12:44:11 PM	2014/11/24 12:53:31 PM	Missouri	Safari	iPad		sample-provider=Cint&respondent=89c87ae9-8739-44c7-9852-ab6e326c3dca	http://s.cint.com/Survey/Fingerprint/89c87ae9-8739-44c7-9852-ab6e326c3dca?sq=1		2096.0	[1, 2, 3, 4, 5, 6, 7, 8, 9]	00:09:20	72.161.230.14					0	2006	10	0	#NULL!	#NULL!	#NULL!	#NULL!	#NULL!	#NULL!	#NULL!	0	3	1	1	1	1	0	2	0	0	1	0	0	0	0	0	2	2
1mc9p96ueeavy5vxvqi5bat5uqq6vmd8	1	24835803	en	2014/11/24 11:45:17 AM	2014/11/24 11:51:41 AM	United States	Google Chrome	Android		sample-provider=Cint&respondent=e2c96832-a1e3-4bd8-b92f-b6a58339e2d1	http://s.cint.com/Survey/Fingerprint/e2c96832-a1e3-4bd8-b92f-b6a58339e2d1?sq=1		2139.0	[1, 2, 3, 4, 5, 6, 7, 8, 9]	00:06:24	104.3.36.24					1	2005	2	#NULL!	#NULL!	2	#NULL!	#NULL!	#NULL!	#NULL!	#NULL!	1	3	2	3	0	2	4	2	4	3	2	3	3	3	3	3	2	3
6enj1ksytkv3go2b74v4y50rqtqx1bk9	1	24815303	en	2014/11/24 8:12:36 AM	2014/11/24 8:30:34 AM	United States	Google Chrome	Other		sample-provider=Cint&respondent=c0e8d1f2-7007-44b4-9576-08360a05a0f6	http://s.cint.com/Survey/Fingerprint/c0e8d1f2-7007-44b4-9576-08360a05a0f6?sq=1		2146.0	[1, 2, 3, 4, 5, 6, 7, 8, 9]	00:17:58	158.222.206.31					1	2006	10	0	1	#NULL!	#NULL!	#NULL!	#NULL!	#NULL!	#NULL!	0	0	0	0	0	2	2	3	4	4	2	2	3	2	2	2	2	2
3i1ynwaymbfwfat4mdi9gc58ni79et4e	1	24833565	en	2014/11/24 11:24:25 AM	2014/11/24 11:32:31 AM	Virginia	Google Chrome	Other		sample-provider=Cint&respondent=96f3c971-c4e1-411b-8d40-502ce82f1e7e	http://s.cint.com/Survey/Fingerprint/96f3c971-c4e1-411b-8d40-502ce82f1e7e		2117.0	[1, 2, 3, 4, 5, 6, 7, 8, 9]	00:08:06	162.210.196.163					1	2007	3	0	#NULL!	#NULL!	#NULL!	#NULL!	#NULL!	#NULL!	#NULL!	0	2	2	1	1	3	4	2	0	0	2	0	2	0	0	0	2	3
sa9y78687aenpnk5zfomq9o5xmuco1xz	1	24817553	en	2014/11/24 8:54:03 AM	2014/11/24 8:57:26 AM	Pennsylvania	Internet Explorer	Other		sample-provider=Cint&respondent=686d2e59-6002-45ad-a99b-6387d673bcac	http://s.cint.com/Survey/Fingerprint/686d2e59-6002-45ad-a99b-6387d673bcac		2104.0	[1, 2, 3, 4, 5, 6, 7, 8, 9]	00:03:23	199.224.21.254					1	2005	9	0	#NULL!	#NULL!	#NULL!	#NULL!	#NULL!	#NULL!	#NULL!	0	1	1	1	1	1	1	1	0	0	1	0	0	0	0	0	2	2
wznygvlkyjmxrsh30ujj9nem1l91atxt	1	24831901	en	2014/11/24 11:07:25 AM	2014/11/24 11:12:58 AM	New York	Safari	iPhone/iPod		sample-provider=Cint&respondent=a7880880-2a4a-4718-8683-555133cb9176	http://s.cint.com/Survey/Fingerprint/a7880880-2a4a-4718-8683-555133cb9176		2111.0	[1, 2, 3, 4, 5, 6, 7, 8, 9]	00:05:32	67.241.142.27					0	2006	12	0	#NULL!	#NULL!	#NULL!	#NULL!	#NULL!	#NULL!	#NULL!	0	2	1	0	0	0	0	0	0	0	2	0	0	0	0	0	2	3
kl9g64lpa27h2amf9zbxy3p2ijyxvo7a	1	24834969	en	2014/11/24 11:38:02 AM	2014/11/24 11:53:38 AM	Kansas	Firefox	Other		sample-provider=Cint&respondent=f3282d96-9e14-48a2-b8e8-bacde9d9c978	http://s.cint.com/Survey/Fingerprint/f3282d96-9e14-48a2-b8e8-bacde9d9c978		2117.0	[1, 2, 3, 4, 5, 6, 7, 8, 9]	00:15:35	12.158.128.144					0	2006	5	0	#NULL!	#NULL!	#NULL!	#NULL!	#NULL!	#NULL!	#NULL!	0	3	0	1	0	1	1	2	0	4	1	0	1	0	0	0	3	4
s74hcsl5hz5fze7hyrk0dt4qwv4m060t	1	24849197	en	2014/11/24 1:57:27 PM	2014/11/24 2:15:21 PM	Georgia	Safari	Android		sample-provider=Cint&respondent=9c32c3c1-ae25-4f02-98b7-44a0f3bb36ca	http://s.cint.com/Survey/Fingerprint/9c32c3c1-ae25-4f02-98b7-44a0f3bb36ca?sq=1		2100.0	[1, 2, 3, 4, 5, 6, 7, 8, 9]	00:17:54	68.184.135.2					1	2004	6	0	#NULL!	#NULL!	#NULL!	#NULL!	#NULL!	#NULL!	#NULL!	0	2	0	2	0	2	0	2	0	5	0	0	0	0	0	0	0	2
v9tl6deii7y7twovtmtpfr32aphyb0po	1	24878303	en	2014/11/24 9:06:38 PM	2014/11/24 9:10:51 PM	United States	Internet Explorer	Other		sample-provider=Cint&respondent=b3445785-9a63-4df3-86ad-294fbc6f5782	http://s.cint.com/Survey/Fingerprint/b3445785-9a63-4df3-86ad-294fbc6f5782?sq=1		2112.0	[1, 2, 3, 4, 5, 6, 7, 8, 9]	00:04:12	104.52.156.93					0	2004	4	#NULL!	#NULL!	2	#NULL!	#NULL!	#NULL!	#NULL!	#NULL!	0	3	2	2	1	3	2	2	1	2	2	0	1	2	1	0	2	3
43kyctcxrthce9x488ulhjgiakhwe0ho	1	24828177	en	2014/11/24 10:32:39 AM	2014/11/24 10:39:22 AM		Google Chrome	Other		sample-provider=Cint&respondent=14893856-971a-4386-9470-416615122e9b	http://s.cint.com/Survey/Fingerprint/14893856-971a-4386-9470-416615122e9b		2091.0	[1, 2, 3, 4, 5, 6, 7, 8, 9]	00:06:43	104.181.237.59					1	2005	9	0	#NULL!	#NULL!	#NULL!	#NULL!	#NULL!	#NULL!	#NULL!	0	1	1	0	0	1	0	0	0	0	2	0	0	0	0	0	0	4
g41b3c19buid84nyqmrpml5rzdihw87d	1	24862211	en	2014/11/24 4:40:05 PM	2014/11/24 5:00:51 PM	United States	Firefox	Other		sample-provider=Cint&respondent=37c6602b-6f0b-4811-a226-092af2d5ace6	http://s.cint.com/Survey/Fingerprint/37c6602b-6f0b-4811-a226-092af2d5ace6?sq=1		2109.0	[1, 2, 3, 4, 5, 6, 7, 8, 9]	00:20:46	70.208.8.60					0	2006	12	0	#NULL!	#NULL!	#NULL!	#NULL!	#NULL!	#NULL!	#NULL!	0	2	0	1	0	0	0	0	0	0	0	0	0	0	0	0	2	2
bbbuqioh7f5lu8yljd4iax8frm5qzz5n	1	24872897	en	2014/11/24 7:36:54 PM	2014/11/24 7:48:51 PM	United States	Firefox	Other		sample-provider=Cint&respondent=2d472848-3cb1-4ec3-8943-c59eaae94695	http://s.cint.com/Survey/Fingerprint/2d472848-3cb1-4ec3-8943-c59eaae94695?sq=1		2102.0	[1, 2, 3, 4, 5, 6, 7, 8, 9]	00:11:55	107.145.238.102					1	2004	6	#NULL!	1	2	#NULL!	#NULL!	#NULL!	#NULL!	#NULL!	0	3	0	3	0	2	0	1	0	0	0	0	0	0	0	0	0	5
txuijhrmmib6woi0l8uwxvl8zqkfjh0w	1	24839083	en	2014/11/24 12:13:12 PM	2014/11/24 12:17:16 PM	Illinois	Internet Explorer	Other		sample-provider=Cint&respondent=24181e19-9901-4a12-91b9-10c9cb4a2c12	http://s.cint.com/Survey/Fingerprint/24181e19-9901-4a12-91b9-10c9cb4a2c12?sq=1		2098.0	[1, 2, 3, 4, 5, 6, 7, 8, 9]	00:04:01	71.239.88.36					0	2005	11	0	#NULL!	#NULL!	#NULL!	#NULL!	#NULL!	#NULL!	#NULL!	0	4	0	0	0	2	0	1	0	0	0	0	0	0	0	0	3	4
qpwdl8fog3wuh26dzegwmhiw82z39nf9	1	24845159	en	2014/11/24 1:17:07 PM	2014/11/24 1:20:39 PM	Ohio	Internet Explorer	Other		sample-provider=Cint&respondent=0633f313-1173-40e9-b4bb-9b1ebf19f68e	http://s.cint.com/Survey/Fingerprint/0633f313-1173-40e9-b4bb-9b1ebf19f68e?sq=1		2089.0	[1, 2, 3, 4, 5, 6, 7, 8, 9]	00:03:31	24.166.44.147					1	2007	6	0	#NULL!	#NULL!	#NULL!	#NULL!	#NULL!	#NULL!	#NULL!	0	3	3	0	0	0	0	0	0	0	3	0	0	0	0	0	0	2
ui8b13bbepi6w6dkpvsbxhhphrcpy53i	1	24880949	en	2014/11/24 9:47:13 PM	2014/11/24 9:57:00 PM	Wisconsin	Google Chrome	Other		sample-provider=Cint&respondent=f67bb333-5b3d-4dfe-af2b-b0d8ccd84d23	http://s.cint.com/Survey/Fingerprint/f67bb333-5b3d-4dfe-af2b-b0d8ccd84d23		2112.0	[1, 2, 3, 4, 5, 6, 7, 8, 9]	00:09:46	97.90.231.204					1	2006	9	0	#NULL!	#NULL!	#NULL!	#NULL!	#NULL!	#NULL!	#NULL!	0	2	2	0	0	1	5	2	0	0	0	0	0	0	0	0	0	3
km9435jzwsm1r1smvsji5pbei2vl38u6	1	24879189	en	2014/11/24 9:19:28 PM	2014/11/24 9:35:55 PM	Virginia	Google Chrome	Other		sample-provider=Cint&respondent=0c64c5ba-77d5-4dd2-baff-a61eeee2c13a	http://s.cint.com/Survey/Fingerprint/0c64c5ba-77d5-4dd2-baff-a61eeee2c13a?sq=1		2091.0	[1, 2, 3, 4, 5, 6, 7, 8, 9]	00:16:26	209.58.128.140					1	2005	1	0	#NULL!	#NULL!	#NULL!	#NULL!	#NULL!	#NULL!	#NULL!	0	0	2	3	0	2	0	1	0	0	3	2	3	0	0	0	3	2
73lx3c5l3nppydrrm7wdpgwm25xvly4f	1	24815013	en	2014/11/24 8:08:07 AM	2014/11/24 8:13:05 AM	Florida	Firefox	Other		sample-provider=Cint&respondent=b9cb085b-9b3e-4179-b2f5-551d8e889bcd	http://s.cint.com/Survey/Fingerprint/b9cb085b-9b3e-4179-b2f5-551d8e889bcd?sq=1		2081.0	[1, 2, 3, 4, 5, 6, 7, 8, 9]	00:04:58	174.131.124.192					1	2005	6	0	#NULL!	#NULL!	#NULL!	#NULL!	#NULL!	#NULL!	#NULL!	0	4	1	0	0	0	0	2	0	0	0	0	0	0	0	0	0	4
pa66e4k0buajsvbt285v7o0o8l1vi8rq	1	24804925	en	2014/11/24 5:11:37 AM	2014/11/24 5:51:57 AM	Ohio	Google Chrome	Other		sample-provider=Cint&respondent=d39ba54e-924a-4c30-b6e3-e38e5e8239db	http://s.cint.com/Survey/Fingerprint/d39ba54e-924a-4c30-b6e3-e38e5e8239db?sq=1		2085.0	[1, 2, 3, 4, 5, 6, 7, 8, 9]	00:40:18	69.47.162.128					1	2004	1	#NULL!	#NULL!	2	#NULL!	#NULL!	#NULL!	#NULL!	#NULL!	0	0	0	0	0	0	0	0	0	0	0	0	0	0	0	0	0	0
1k6pagfg4xbsba9h0iv3kwi35xsqhsde	1	24881881	en	2014/11/24 10:19:30 PM	2014/11/24 10:46:55 PM	Oregon	Safari	iPhone/iPod		sample-provider=Cint&respondent=663af907-e241-4548-9bea-b2caa3534763	http://s.cint.com/Survey/Fingerprint/663af907-e241-4548-9bea-b2caa3534763		2039.0	[1, 2, 3, 4, 5, 6, 7, 8, 9]	00:27:25	76.115.217.104					1	2006	8	0	#NULL!	#NULL!	#NULL!	#NULL!	#NULL!	#NULL!	#NULL!	0	0	0	0	0	0	0	0	0	0	0	0	0	0	0	0	0	0
lglpm4ik9lwc4lne6qaz5cebqkw7be9a	1	24866917	en	2014/11/24 6:03:48 PM	2014/11/24 6:05:38 PM	Wyoming	Google Chrome	Other		sample-provider=Cint&respondent=02cebf0e-1b76-43b7-8d4a-da949faecaca	http://s.cint.com/Survey/Fingerprint/02cebf0e-1b76-43b7-8d4a-da949faecaca?sq=1		2102.0	[1, 2, 3, 4, 5, 6, 7, 8, 9]	00:01:50	192.151.197.231					1	2004	2	#NULL!	#NULL!	#NULL!	#NULL!	#NULL!	#NULL!	#NULL!	7	0	3	3	2	3	3	2	3	2	2	3	3	2	2	2	2	2	1
ehguzt6z4a2prkjhrmmy79ev3q0e0pgc	1	24849349	en	2014/11/24 1:58:04 PM	2014/11/24 2:12:31 PM	Florida	Firefox	Other		sample-provider=Cint&respondent=0621d559-e774-4a2d-956e-c43a0c1e2104	http://s.cint.com/Survey/Fingerprint/0621d559-e774-4a2d-956e-c43a0c1e2104?sq=1		2100.0	[1, 2, 3, 4, 5, 6, 7, 8, 9]	00:14:26	65.32.180.81					1	2004	4	0	#NULL!	#NULL!	#NULL!	#NULL!	#NULL!	#NULL!	#NULL!	0	2	4	4	0	0	0	0	0	0	4	0	0	0	0	0	0	4
x7r2topdqfsxpuwblq5w1gypxaxw3zah	1	24846917	en	2014/11/24 1:33:30 PM	2014/11/24 1:45:20 PM	Indiana	Internet Explorer	Other		sample-provider=Cint&respondent=8da7904f-7b7d-40e9-9deb-e0a959f9ca81	http://s.cint.com/Survey/Fingerprint/8da7904f-7b7d-40e9-9deb-e0a959f9ca81?sq=1		2106.0	[1, 2, 3, 4, 5, 6, 7, 8, 9]	00:11:48	205.242.83.12					0	2005	11	0	#NULL!	#NULL!	#NULL!	#NULL!	#NULL!	#NULL!	#NULL!	0	4	4	0	0	1	0	0	0	0	0	0	0	0	0	0	0	4
0d1dtfvsaam42fu7z5nxi3jvkbltffk5	1	24850529	en	2014/11/24 2:11:47 PM	2014/11/24 2:18:57 PM	California	Google Chrome	Other		sample-provider=Cint&respondent=df4a70fb-4886-4e8f-9f0f-0ff3c8d15933	http://s.cint.com/Survey/Fingerprint/df4a70fb-4886-4e8f-9f0f-0ff3c8d15933?sq=1		2139.0	[1, 2, 3, 4, 5, 6, 7, 8, 9]	00:07:09	108.197.33.243					1	2006	9	0	#NULL!	#NULL!	#NULL!	#NULL!	#NULL!	#NULL!	#NULL!	1	5	3	5	0	3	4	2	0	0	4	0	3	2	0	1	0	2
4ggbf745zxzze54ns8gm0lj6igzp6r7n	1	24850623	en	2014/11/24 2:13:00 PM	2014/11/24 2:19:57 PM	Arizona	Firefox	Other		sample-provider=Cint&respondent=3dd1147d-fb38-4173-83a7-214927f53a41	http://s.cint.com/Survey/Fingerprint/3dd1147d-fb38-4173-83a7-214927f53a41?sq=1		2133.0	[1, 2, 3, 4, 5, 6, 7, 8, 9]	00:06:57	68.109.178.161					0	2004	5	#NULL!	1	#NULL!	#NULL!	#NULL!	#NULL!	#NULL!	#NULL!	0	5	5	5	0	2	0	5	0	0	5	0	3	0	0	0	0	0
lyxfrmt1xxhhvwi0szk47fisp6ip9a95	1	24828535	en	2014/11/24 10:35:58 AM	2014/11/24 10:45:12 AM	Texas	Internet Explorer	Other		sample-provider=Cint&respondent=17ce5ca0-d35c-4054-b692-e391e1f15351	http://queensu.fluidsurveys.com/surveys/dr-janssen/parental-influence-and-active-play-1/?sample-provider=Cint&respondent=17ce5ca0-d35c-4054-b692-e391e1f15351		2103.0	[1, 2, 3, 4, 5, 6, 7, 8, 9]	00:09:13	144.160.98.94					1	2003	12	0	#NULL!	#NULL!	#NULL!	#NULL!	#NULL!	#NULL!	#NULL!	0	3	0	0	0	0	0	0	3	3	0	0	0	0	0	0	0	3
a59klb94qszy383w9zhuqdjr1x0wdewp	1	24820481	en	2014/11/24 9:21:51 AM	2014/11/24 9:26:09 AM	Texas	Google Chrome	Other		sample-provider=Cint&respondent=a8f168ab-7eb3-4748-a1b3-6cbfd31dcbc6	http://s.cint.com/Survey/Fingerprint/a8f168ab-7eb3-4748-a1b3-6cbfd31dcbc6		2087.0	[1, 2, 3, 4, 5, 6, 7, 8, 9]	00:04:18	199.188.251.150					0	2004	7	0	#NULL!	#NULL!	#NULL!	#NULL!	#NULL!	#NULL!	#NULL!	1	3	0	0	0	1	1	1	0	0	0	0	0	0	0	0	0	5
9brn7zd1yfndtbasl71eqhzeqoii95t3	1	24812519	en	2014/11/24 7:18:21 AM	2014/11/24 7:33:41 AM	Massachusetts	Google Chrome	Other		sample-provider=Cint&respondent=58709dc5-d245-4067-815b-401fc0739e05	http://s.cint.com/Survey/Fingerprint/58709dc5-d245-4067-815b-401fc0739e05?sq=1		2092.0	[1, 2, 3, 4, 5, 6, 7, 8, 9]	00:15:20	24.34.178.70					1	2006	8	0	#NULL!	#NULL!	#NULL!	#NULL!	#NULL!	#NULL!	#NULL!	0	1	1	0	0	1	0	0	0	0	0	0	0	0	0	0	0	3
op0t6qei3lmk7y7wis2htpwe0ib424m2	1	24832529	en	2014/11/24 11:13:18 AM	2014/11/24 11:17:54 AM	California	Google Chrome	Other		sample-provider=Cint&respondent=05b0107d-2fc3-44b5-8fa0-7ec8d1eb0e0d	http://s.cint.com/Survey/Fingerprint/05b0107d-2fc3-44b5-8fa0-7ec8d1eb0e0d?sq=1		2087.0	[1, 2, 3, 4, 5, 6, 7, 8, 9]	00:04:36	96.40.132.70					1	2006	10	#NULL!	#NULL!	#NULL!	#NULL!	4	#NULL!	#NULL!	#NULL!	0	0	0	0	0	1	4	0	0	0	0	0	0	1	1	1	0	0
7hpezr3idkd8fnt8kv3mf6pimhfoqvx1	1	24849375	en	2014/11/24 1:58:28 PM	2014/11/24 2:52:00 PM	Arkansas	Google Chrome	Other		sample-provider=Cint&respondent=1ac38922-572b-4817-9711-35283d3bdf4c	http://s.cint.com/Survey/Fingerprint/1ac38922-572b-4817-9711-35283d3bdf4c?sq=1		2090.0	[1, 2, 3, 4, 5, 6, 7, 8, 9]	00:53:32	99.91.168.232					1	2004	4	0	1	#NULL!	#NULL!	#NULL!	#NULL!	#NULL!	#NULL!	0	4	1	0	0	2	4	1	0	0	2	0	2	1	1	0	0	4
qs9p8vn7xii431s46r4ns2fiazg9ncqh	1	24815823	en	2014/11/24 8:21:47 AM	2014/11/24 8:27:58 AM	Michigan	Google Chrome	Other		sample-provider=Cint&respondent=bd8f78f0-b0ce-4bca-a61c-4f164e699881	http://s.cint.com/Survey/Fingerprint/bd8f78f0-b0ce-4bca-a61c-4f164e699881		2126.0	[1, 2, 3, 4, 5, 6, 7, 8, 9]	00:06:10	50.105.76.58					1	2005	3	0	#NULL!	#NULL!	#NULL!	#NULL!	#NULL!	#NULL!	#NULL!	0	5	5	5	1	1	5	1	0	0	5	0	1	1	0	0	0	5
uqx8z6rnk9uxhyt2hf0rcz3g1swmdm99	1	24877909	en	2014/11/24 9:01:24 PM	2014/11/24 9:26:29 PM	Georgia	Google Chrome	Other		sample-provider=Cint&respondent=28359aca-d78e-4a55-9f08-735b87bce510	http://s.cint.com/Survey/Fingerprint/28359aca-d78e-4a55-9f08-735b87bce510?sq=1		2097.0	[1, 2, 3, 4, 5, 6, 7, 8, 9]	00:25:04	70.185.189.122					1	2003	11	0	#NULL!	#NULL!	#NULL!	#NULL!	#NULL!	#NULL!	#NULL!	0	3	1	0	0	1	0	0	0	0	0	0	0	0	0	0	4	5
n6a0p56rbuji1bj54nutgwhcgwc9esxd	1	24820927	en	2014/11/24 9:27:19 AM	2014/11/24 9:31:53 AM	Florida	Safari	iPhone/iPod		sample-provider=Cint&respondent=5189e30d-ab43-4fdd-a941-1a985e93d8a6	http://s.cint.com/Survey/Fingerprint/5189e30d-ab43-4fdd-a941-1a985e93d8a6		2126.0	[1, 2, 3, 4, 5, 6, 7, 8, 9]	00:04:33	174.58.229.161					1	2004	11	0	#NULL!	#NULL!	#NULL!	#NULL!	#NULL!	#NULL!	#NULL!	0	4	3	2	0	4	0	2	0	0	3	0	2	0	0	0	2	3
zk3sdkon8k5x3ryuddi77tnhm5br27q6	1	24824997	en	2014/11/24 9:58:41 AM	2014/11/24 10:02:43 AM	Mississippi	Firefox	Other		sample-provider=Cint&respondent=15560eea-c978-4c03-9960-037ec2b5bca9	http://s.cint.com/Survey/Fingerprint/15560eea-c978-4c03-9960-037ec2b5bca9?sq=1		2099.0	[1, 2, 3, 4, 5, 6, 7, 8, 9]	00:04:01	96.18.92.8					0	2007	1	0	#NULL!	#NULL!	#NULL!	#NULL!	#NULL!	#NULL!	#NULL!	0	5	3	0	0	0	0	0	0	0	0	0	0	0	0	0	0	5
7ryphdomcn8wkmrka0uw097mkzl700xt	1	24811559	en	2014/11/24 7:03:43 AM	2014/11/24 7:07:50 AM	Connecticut	Google Chrome	Other		sample-provider=Cint&respondent=287d1d7a-f929-4a50-90fa-fbc4a16d1a64	http://s.cint.com/Survey/Fingerprint/287d1d7a-f929-4a50-90fa-fbc4a16d1a64?sq=1		2099.0	[1, 2, 3, 4, 5, 6, 7, 8, 9]	00:04:07	76.23.215.138					0	2003	10	0	#NULL!	#NULL!	#NULL!	#NULL!	#NULL!	#NULL!	#NULL!	0	2	0	0	0	1	0	1	0	0	0	0	0	1	0	0	2	1
ke1iftyi5qajkz6qzhatkmtsecalha9c	1	24830257	en	2014/11/24 10:52:21 AM	2014/11/24 11:00:37 AM	Kentucky	Google Chrome	Other		sample-provider=Cint&respondent=5d1fc297-95c5-446e-9855-9ef2096f418a	http://s.cint.com/Survey/Fingerprint/5d1fc297-95c5-446e-9855-9ef2096f418a?sq=1		2092.0	[1, 2, 3, 4, 5, 6, 7, 8, 9]	00:08:16	74.137.179.234					1	2007	8	0	#NULL!	#NULL!	#NULL!	#NULL!	#NULL!	#NULL!	#NULL!	0	2	0	0	0	4	1	1	0	0	0	0	0	0	0	0	2	2
uekk6psdxt0avdqr92hvajbzrhck0fm9	1	24840387	en	2014/11/24 12:24:21 PM	2014/11/24 12:40:17 PM	Wisconsin	Internet Explorer	Other		sample-provider=Cint&respondent=b6ba9556-c94e-4b23-b7b1-7a1d8403de09	http://s.cint.com/Survey/Fingerprint/b6ba9556-c94e-4b23-b7b1-7a1d8403de09?sq=1		2107.0	[1, 2, 3, 4, 5, 6, 7, 8, 9]	00:15:56	107.223.218.174					1	2004	11	0	#NULL!	#NULL!	#NULL!	#NULL!	#NULL!	#NULL!	#NULL!	0	1	1	0	0	1	3	0	0	0	2	0	0	0	0	0	2	4
67obutn3y0187c23lavvglzuwsxlkxer	1	24813661	en	2014/11/24 7:41:08 AM	2014/11/24 7:46:54 AM	Virginia	Firefox	Other		sample-provider=Cint&respondent=831da7cc-813e-43c1-9f36-e5e161c2dfcf	http://s.cint.com/Survey/Fingerprint/831da7cc-813e-43c1-9f36-e5e161c2dfcf		2118.0	[1, 2, 3, 4, 5, 6, 7, 8, 9]	00:05:44	173.50.73.82					1	2005	9	0	#NULL!	#NULL!	#NULL!	#NULL!	#NULL!	#NULL!	#NULL!	0	0	2	2	1	2	0	2	5	5	2	0	2	0	0	1	2	3
rd25pqyyozp78fwvuudv7ef3uy7bs3c5	1	24864363	en	2014/11/24 5:12:54 PM	2014/11/24 5:21:50 PM	Illinois	Firefox	Other		sample-provider=Cint&respondent=6ccf8044-7a9c-4420-bac0-0407502f0dcc	http://s.cint.com/Survey/Fingerprint/6ccf8044-7a9c-4420-bac0-0407502f0dcc		2099.0	[1, 2, 3, 4, 5, 6, 7, 8, 9]	00:08:56	67.184.75.202					0	2006	11	#NULL!	#NULL!	#NULL!	#NULL!	4	#NULL!	#NULL!	#NULL!	1	0	0	0	0	1	3	0	0	1	1	0	0	0	0	0	0	3
86hav1uhl2jvxyb4gv818ipbjc5t5z5j	1	24833313	en	2014/11/24 11:21:41 AM	2014/11/24 11:27:52 AM	California	Google Chrome	Other		sample-provider=Cint&respondent=55a27c22-62b7-47e0-87b5-489bd25d2156	http://s.cint.com/Survey/Fingerprint/55a27c22-62b7-47e0-87b5-489bd25d2156?sq=1		2090.0	[1, 2, 3, 4, 5, 6, 7, 8, 9]	00:06:10	38.96.13.24					1	2003	3	0	#NULL!	#NULL!	#NULL!	#NULL!	#NULL!	#NULL!	#NULL!	0	0	0	0	0	0	5	0	0	0	0	0	0	0	0	0	5	5
ricnyigjqihdt3bgztvukod3nhaa56nt	1	24842745	en	2014/11/24 12:48:56 PM	2014/11/24 12:55:16 PM	Texas	Google Chrome	Other		sample-provider=Cint&respondent=6dc7bc94-db08-4b5a-8170-f10928b19e41	http://s.cint.com/Survey/Fingerprint/6dc7bc94-db08-4b5a-8170-f10928b19e41?sq=1		2082.0	[1, 2, 3, 4, 5, 6, 7, 8, 9]	00:06:18	162.237.109.178					1	2003	1	0	#NULL!	#NULL!	#NULL!	#NULL!	#NULL!	#NULL!	#NULL!	0	0	0	0	0	0	0	0	0	0	0	0	0	1	0	0	0	5
icl4337eqegds8z23lnbwn8o90ibr6z7	1	24883715	en	2014/11/24 11:17:11 PM	2014/11/24 11:23:17 PM	Nebraska	Internet Explorer	Other		sample-provider=Cint&respondent=111cf69a-e92e-4042-a281-e2184c6e135a	http://s.cint.com/Survey/Fingerprint/111cf69a-e92e-4042-a281-e2184c6e135a?sq=1		2095.0	[1, 2, 3, 4, 5, 6, 7, 8, 9]	00:06:06	67.3.131.105					1	2007	5	0	#NULL!	2	#NULL!	#NULL!	#NULL!	#NULL!	#NULL!	0	2	2	0	0	1	0	0	0	0	0	0	1	0	0	0	2	5
h7hfxu9ys00fkna2qont6ak5bcme3xlx	1	24818841	en	2014/11/24 9:09:16 AM	2014/11/24 9:13:13 AM		Google Chrome	Other		sample-provider=Cint&respondent=2755b057-5d0a-4810-b1bc-6e22ee665c18	http://s.cint.com/Survey/Fingerprint/2755b057-5d0a-4810-b1bc-6e22ee665c18		2089.0	[1, 2, 3, 4, 5, 6, 7, 8, 9]	00:03:56	10.33.129.2					1	2005	5	0	#NULL!	#NULL!	#NULL!	#NULL!	#NULL!	#NULL!	#NULL!	0	1	1	1	0	0	0	1	0	0	0	0	0	0	0	0	2	5
bcsmfnlwy7escg3oqvf0p60j1wr2jkeg	1	24822513	en	2014/11/24 9:43:27 AM	2014/11/24 9:49:09 AM	North Carolina	Safari	Android		sample-provider=Cint&respondent=44ddc978-a3a5-40ed-bdac-325c0d069269	http://s.cint.com/Survey/Fingerprint/44ddc978-a3a5-40ed-bdac-325c0d069269		2129.0	[1, 2, 3, 4, 5, 6, 7, 8, 9]	00:05:42	174.106.198.170					1	2006	1	0	#NULL!	2	3	#NULL!	#NULL!	#NULL!	#NULL!	1	5	5	0	0	5	3	1	0	0	2	0	0	0	0	0	1	3
4eipe0lkabivtruf53q25negvybd94f8	1	24841287	en	2014/11/24 12:32:59 PM	2014/11/24 12:42:15 PM	Utah	Safari	iPad		sample-provider=Cint&respondent=23c60481-54f0-4fd2-ad79-a7b77d5c17fc	http://s.cint.com/Survey/Fingerprint/23c60481-54f0-4fd2-ad79-a7b77d5c17fc?sq=1		2115.0	[1, 2, 3, 4, 5, 6, 7, 8, 9]	00:09:16	50.8.93.223					0	2004	6	0	#NULL!	#NULL!	#NULL!	#NULL!	#NULL!	#NULL!	#NULL!	0	2	2	2	1	0	0	0	2	3	4	0	0	0	0	0	0	3
6pl7nye3ilz2i5warxipfn497c8q5iz3	1	24878831	en	2014/11/24 9:14:21 PM	2014/11/24 9:23:47 PM	New York	Safari	iPad		sample-provider=Cint&respondent=1a6ad867-269b-48c3-9102-f03c82cf2f46	http://s.cint.com/Survey/Fingerprint/1a6ad867-269b-48c3-9102-f03c82cf2f46?sq=1		2102.0	[1, 2, 3, 4, 5, 6, 7, 8, 9]	00:09:25	69.195.50.206					0	2005	8	0	#NULL!	#NULL!	#NULL!	#NULL!	#NULL!	#NULL!	#NULL!	0	4	2	0	0	1	0	1	0	0	2	0	1	0	0	0	2	4
dr1wtamh847tsyzi1yire0krd9hxfijf	1	24816727	en	2014/11/24 8:39:13 AM	2014/11/24 8:44:49 AM	United States	Internet Explorer	Other		sample-provider=Cint&respondent=0923b9ce-d3e4-43d0-9cef-0222319444b7	http://s.cint.com/Survey/Fingerprint/0923b9ce-d3e4-43d0-9cef-0222319444b7?sq=1		2112.0	[1, 2, 3, 4, 5, 6, 7, 8, 9]	00:05:36	73.12.39.1					1	2006	6	0	#NULL!	#NULL!	#NULL!	#NULL!	#NULL!	#NULL!	#NULL!	0	5	2	1	1	2	0	3	0	0	0	0	1	2	0	0	2	5
ijal6dkbpfuks6yvo44tvi5xlzkqqr37	1	24841361	en	2014/11/24 12:33:40 PM	2014/11/24 12:55:39 PM	United States	Google Chrome	Other		sample-provider=Cint&respondent=5f53a142-8a93-4478-b380-dda75c9c5f6d	http://s.cint.com/Survey/Fingerprint/5f53a142-8a93-4478-b380-dda75c9c5f6d?sq=1		2114.0	[1, 2, 3, 4, 5, 6, 7, 8, 9]	00:21:59	73.169.35.137					1	2003	12	0	#NULL!	#NULL!	#NULL!	#NULL!	#NULL!	#NULL!	#NULL!	0	0	0	0	0	1	1	1	4	0	0	0	1	1	1	5	0	2
n6625odo5biwqgl64nrjhrb6conojrvr	1	24869099	en	2014/11/24 6:52:10 PM	2014/11/24 7:03:23 PM	California	Firefox	Other		sample-provider=Cint&respondent=fdc3d39a-4e3d-45d4-844a-8cad7bace3d6	http://s.cint.com/Survey/Fingerprint/fdc3d39a-4e3d-45d4-844a-8cad7bace3d6?sq=1		2117.0	[1, 2, 3, 4, 5, 6, 7, 8, 9]	00:11:13	23.228.204.73					1	2006	5	#NULL!	1	#NULL!	#NULL!	#NULL!	#NULL!	#NULL!	#NULL!	1	2	3	3	0	1	2	0	3	2	3	2	2	3	2	0	2	2
avlxid62huqgpk5tyxl6f8hbgs8a5f84	1	24854723	en	2014/11/24 3:01:29 PM	2014/11/24 3:11:55 PM	Illinois	Google Chrome	Other		sample-provider=Cint&respondent=06cbcc41-6592-4194-98f5-496249e9d9f4	http://s.cint.com/Survey/Fingerprint/06cbcc41-6592-4194-98f5-496249e9d9f4		2114.0	[1, 2, 3, 4, 5, 6, 7, 8, 9]	00:10:26	98.213.62.181					0	2005	8	0	#NULL!	#NULL!	#NULL!	#NULL!	#NULL!	#NULL!	#NULL!	0	2	2	1	0	2	3	1	0	0	3	1	3	0	2	0	0	3
tw7u0m98fkpdp7nr6otnti9otcn8xl2w	1	24818241	en	2014/11/24 9:03:15 AM	2014/11/24 9:10:51 AM	Indiana	Google Chrome	Android		sample-provider=Cint&respondent=80995258-209b-4c19-b098-60af11ef2ad4	http://s.cint.com/Survey/Fingerprint/80995258-209b-4c19-b098-60af11ef2ad4		2096.0	[1, 2, 3, 4, 5, 6, 7, 8, 9]	00:07:35	184.0.65.99					1	2007	3	0	#NULL!	#NULL!	#NULL!	#NULL!	#NULL!	#NULL!	#NULL!	0	2	1	0	1	1	0	2	0	0	1	0	1	0	0	0	1	0
xgpelu96exeq4iyf3ptatwxp1kf0lure	1	24818435	en	2014/11/24 9:04:55 AM	2014/11/24 9:08:57 AM	Missouri	Internet Explorer	Other		sample-provider=Cint&respondent=438d3bda-e27d-4116-9f80-c01f97bc45e9	http://s.cint.com/Survey/Fingerprint/438d3bda-e27d-4116-9f80-c01f97bc45e9?sq=1		2087.0	[1, 2, 3, 4, 5, 6, 7, 8, 9]	00:04:02	99.119.138.169					1	2004	1	0	#NULL!	#NULL!	#NULL!	#NULL!	#NULL!	#NULL!	#NULL!	0	1	0	1	0	1	0	1	0	0	0	0	0	0	0	1	1	3
20eruf4vt9zk5odomvm1q8lipo4uilmf	1	24860103	en	2014/11/24 4:11:04 PM	2014/11/24 4:17:18 PM		Google Chrome	Other		sample-provider=Cint&respondent=6b351003-4a97-4df4-88e3-f607a2aef627	http://s.cint.com/Survey/Fingerprint/6b351003-4a97-4df4-88e3-f607a2aef627?sq=1		2094.0	[1, 2, 3, 4, 5, 6, 7, 8, 9]	00:06:14	172.24.200.87					0	2003	5	0	#NULL!	#NULL!	#NULL!	#NULL!	#NULL!	#NULL!	#NULL!	0	1	1	1	0	1	0	2	0	0	0	1	1	2	0	0	0	5
c4gezu75w9nbwt27rmycvy6fbl2xad4f	1	24874731	en	2014/11/24 8:06:14 PM	2014/11/24 8:14:45 PM	South Carolina	Safari	Android		sample-provider=Cint&respondent=082b6e72-04c1-446d-8897-40477e0d7746	http://s.cint.com/Survey/Fingerprint/082b6e72-04c1-446d-8897-40477e0d7746?sq=1		2090.0	[1, 2, 3, 4, 5, 6, 7, 8, 9]	00:08:31	24.168.234.115					1	2005	4	0	#NULL!	#NULL!	#NULL!	#NULL!	#NULL!	#NULL!	#NULL!	0	0	2	5	0	0	0	4	4	4	0	0	0	1	0	0	0	3
1xbxkqe2ry8101v215gz27i938n7u3uw	1	24880877	en	2014/11/24 9:44:43 PM	2014/11/24 9:51:27 PM	United States	Internet Explorer	Other		sample-provider=Cint&respondent=0eca0268-42f7-40f5-ad97-e1ae4d506f0e	http://s.cint.com/Survey/Fingerprint/0eca0268-42f7-40f5-ad97-e1ae4d506f0e?sq=1		2055.0	[1, 2, 3, 4, 5, 6, 7, 8, 9]	00:06:43	73.185.220.44					0	2006	3	0	#NULL!	#NULL!	#NULL!	#NULL!	#NULL!	#NULL!	#NULL!	0	1	0	0	0	1	5	0	0	0	0	0	0	0	0	0	0	3
et11mocfdb0jvsxqmui2t93bqhq77obi	1	24832019	en	2014/11/24 11:08:39 AM	2014/11/24 11:17:29 AM	Illinois	Internet Explorer	Other		sample-provider=Cint&respondent=b330ac7d-f1b3-46d8-92f7-f59f87015a08	http://s.cint.com/Survey/Fingerprint/b330ac7d-f1b3-46d8-92f7-f59f87015a08?sq=1		2088.0	[1, 2, 3, 4, 5, 6, 7, 8, 9]	00:08:50	76.245.250.107					0	2004	12	0	#NULL!	#NULL!	#NULL!	#NULL!	#NULL!	#NULL!	#NULL!	0	2	1	0	0	1	0	0	0	3	0	0	0	0	0	0	2	2
7f1hkg8gruooffqcxilmj6bt8chzgt6j	1	24832359	en	2014/11/24 11:11:47 AM	2014/11/24 11:17:36 AM	Wyoming	Internet Explorer	Other		sample-provider=Cint&respondent=5b23a456-2db4-4b55-ac2a-a4346ec77af3	http://s.cint.com/Survey/Fingerprint/5b23a456-2db4-4b55-ac2a-a4346ec77af3		2073.0	[1, 2, 3, 4, 5, 6, 7, 8, 9]	00:05:48	75.163.1.86					0	2004	5	0	#NULL!	#NULL!	#NULL!	#NULL!	#NULL!	#NULL!	#NULL!	0	1	0	0	0	0	0	1	0	0	0	0	0	0	0	0	0	3
k5s29mjmnmk7sv6693em3p3058mk9yi6	1	24868625	en	2014/11/24 6:41:16 PM	2014/11/24 6:47:35 PM	North Carolina	Internet Explorer	Other		sample-provider=Cint&respondent=8b7271e3-1b7f-4c60-9fb1-46a710dc28ec	http://s.cint.com/Survey/Fingerprint/8b7271e3-1b7f-4c60-9fb1-46a710dc28ec?sq=1		2072.0	[1, 2, 3, 4, 5, 6, 7, 8, 9]	00:06:19	71.28.86.81					1	2003	2	#NULL!	#NULL!	#NULL!	3	#NULL!	#NULL!	#NULL!	#NULL!	1	1	0	1	0	0	0	1	0	0	0	0	0	0	0	0	2	1
r0spmw86yd2ggiaceqqxy3b9wfz19o44	1	24887335	en	2014/11/25 12:34:46 AM	2014/11/25 12:41:59 AM	Nebraska	Google Chrome	Android		sample-provider=Cint&respondent=12fc4e55-ce5b-4879-ab0c-64f41b4ed35e	http://s.cint.com/Survey/Fingerprint/12fc4e55-ce5b-4879-ab0c-64f41b4ed35e?sq=1		2144.0	[1, 2, 3, 4, 5, 6, 7, 8, 9]	00:07:13	174.74.80.23					1	2006	10	0	#NULL!	#NULL!	#NULL!	#NULL!	#NULL!	#NULL!	#NULL!	0	4	4	4	2	3	3	3	0	0	3	0	2	1	0	0	2	2
jfcui78wx548ukpvqzk5hlhq40hqu43u	1	24877477	en	2014/11/24 8:55:05 PM	2014/11/24 8:59:39 PM	Michigan	Google Chrome	Other		sample-provider=Cint&respondent=8daeb2d6-d954-4391-aa2c-7389842d01df	http://s.cint.com/Survey/Fingerprint/8daeb2d6-d954-4391-aa2c-7389842d01df?sq=1		2106.0	[1, 2, 3, 4, 5, 6, 7, 8, 9]	00:04:33	108.250.127.33					1	2005	6	0	#NULL!	#NULL!	#NULL!	#NULL!	#NULL!	#NULL!	#NULL!	0	3	2	2	1	1	0	1	0	0	3	0	1	0	0	0	0	2
5908hasxvkmq1mwuqxjg4oi10xy29bkz	1	24815943	en	2014/11/24 8:24:08 AM	2014/11/24 8:28:26 AM	Minnesota	Google Chrome	Other		sample-provider=Cint&respondent=c7dcebd4-517e-442c-95c6-6aa6ee39d5cc	http://s.cint.com/Survey/Fingerprint/c7dcebd4-517e-442c-95c6-6aa6ee39d5cc?sq=1		2100.0	[1, 2, 3, 4, 5, 6, 7, 8, 9]	00:04:18	74.33.88.207					0	2004	4	0	#NULL!	#NULL!	#NULL!	#NULL!	#NULL!	#NULL!	#NULL!	0	1	0	0	0	1	4	0	0	0	0	0	0	0	0	0	2	3
8husm25re66l5gvw66tu4yqpb6cw1pw9	1	24874963	en	2014/11/24 8:10:39 PM	2014/11/24 10:44:54 PM	California	Safari	Android		sample-provider=Cint&respondent=63ba01d1-5919-4d34-a839-a53048262300	http://s.cint.com/Survey/Fingerprint/63ba01d1-5919-4d34-a839-a53048262300?sq=1		2147.0	[1, 2, 3, 4, 5, 6, 7, 8, 9]	00:08:03	71.20.187.44					0	2006	9	#NULL!	1	#NULL!	#NULL!	#NULL!	#NULL!	#NULL!	#NULL!	0	5	2	0	2	1	4	1	4	4	2	0	1	3	0	3	2	2
9so50dekoctak3fvr9bed1v8drxejdi9	1	24828113	en	2014/11/24 10:32:03 AM	2014/11/24 10:40:49 AM	New York	Google Chrome	Other		sample-provider=Cint&respondent=62216b46-5c3d-43b2-ad54-afbc6a44c85e	http://s.cint.com/Survey/Fingerprint/62216b46-5c3d-43b2-ad54-afbc6a44c85e?sq=1		2110.0	[1, 2, 3, 4, 5, 6, 7, 8, 9]	00:08:46	96.249.6.31					0	2005	6	0	#NULL!	2	3	#NULL!	#NULL!	#NULL!	#NULL!	1	2	3	2	2	4	1	1	0	0	3	0	0	0	0	0	0	3
xai231ufn8kwwjn1nwwg8ddx4fjz8y1q	1	24833143	en	2014/11/24 11:20:03 AM	2014/11/24 11:31:23 AM	Virginia	Google Chrome	Other		sample-provider=Cint&respondent=878008a5-1659-4022-80fc-8341bd148fb1	http://s.cint.com/Survey/Fingerprint/878008a5-1659-4022-80fc-8341bd148fb1?sq=1		2091.0	[1, 2, 3, 4, 5, 6, 7, 8, 9]	00:11:19	71.176.21.163					0	2006	3	0	#NULL!	#NULL!	#NULL!	#NULL!	#NULL!	#NULL!	#NULL!	0	5	0	0	0	2	4	3	0	0	0	0	0	0	0	0	0	2
iw0q7jyt08686ez35rap5gtoou8ofp3s	1	24845483	en	2014/11/24 1:21:32 PM	2014/11/24 1:31:43 PM	California	Internet Explorer	Other		sample-provider=Cint&respondent=7ae59141-817f-4385-b996-b3be5e2d208d	http://queensu.fluidsurveys.com/surveys/dr-janssen/parental-influence-and-active-play-1/?sample-provider=Cint&respondent=7ae59141-817f-4385-b996-b3be5e2d208d		2120.0	[1, 2, 3, 4, 5, 6, 7, 8, 9]	00:10:10	38.88.216.226					0	2003	10	#NULL!	#NULL!	#NULL!	#NULL!	4	#NULL!	#NULL!	#NULL!	0	1	1	1	1	2	2	2	4	4	0	0	0	0	0	0	0	2
x9pa772hc5q5uspqm76tew5gxxptbybt	1	24850821	en	2014/11/24 2:15:52 PM	2014/11/24 2:31:40 PM	California	Internet Explorer	Other		sample-provider=Cint&respondent=ad2a0aa5-237a-4d81-9393-f2285f65eedf	http://s.cint.com/Survey/Fingerprint/ad2a0aa5-237a-4d81-9393-f2285f65eedf		2124.0	[1, 2, 3, 4, 5, 6, 7, 8, 9]	00:15:47	209.58.222.118					1	2005	10	#NULL!	1	#NULL!	#NULL!	#NULL!	#NULL!	#NULL!	#NULL!	0	5	2	3	0	3	0	1	2	4	3	0	1	0	0	0	1	4
t3ytftc4109qdpvyr36ytogm86f6cvl9	1	24859687	en	2014/11/24 4:05:15 PM	2014/11/24 4:13:40 PM	United States	Safari	iPhone/iPod		sample-provider=Cint&respondent=bef6457f-1fc5-4c5b-917c-3e49ad37cb47	http://s.cint.com/Survey/Fingerprint/bef6457f-1fc5-4c5b-917c-3e49ad37cb47?sq=1		2100.0	[1, 2, 3, 4, 5, 6, 7, 8, 9]	00:08:25	73.54.242.196					0	2006	7	0	#NULL!	#NULL!	#NULL!	#NULL!	#NULL!	#NULL!	#NULL!	0	2	0	0	0	2	0	2	0	0	0	0	0	0	0	0	0	4
k4lwl1iexv5y9l0kfdhkd29ppj9u9ayl	1	24848545	en	2014/11/24 1:50:58 PM	2014/11/24 1:56:50 PM	Michigan	Google Chrome	Other		sample-provider=Cint&respondent=9b30b9ab-0aa4-4af3-ad67-74dbc1021b66	http://s.cint.com/Survey/Fingerprint/9b30b9ab-0aa4-4af3-ad67-74dbc1021b66		2097.0	[1, 2, 3, 4, 5, 6, 7, 8, 9]	00:05:52	71.82.82.112					0	2006	5	0	#NULL!	#NULL!	#NULL!	#NULL!	#NULL!	#NULL!	#NULL!	0	5	2	0	0	0	2	0	0	0	0	0	0	0	0	0	0	2
wjvk8xin16rpljpbdzc3qhcepo8w3rsc	1	24867587	en	2014/11/24 6:18:56 PM	2014/11/24 6:26:41 PM	Delaware	Safari	iPad		sample-provider=Cint&respondent=b418f797-68de-46f1-ba94-8d854b2bbc61	http://s.cint.com/Survey/Fingerprint/b418f797-68de-46f1-ba94-8d854b2bbc61?sq=1		2119.0	[1, 2, 3, 4, 5, 6, 7, 8, 9]	00:07:45	50.190.127.142					0	2007	5	0	#NULL!	2	#NULL!	#NULL!	#NULL!	#NULL!	#NULL!	0	3	1	1	1	3	4	4	0	0	2	0	3	2	0	1	1	5
eu7ut95ivaheww7s5jkcfdc46x9i7eo5	1	24829021	en	2014/11/24 10:40:47 AM	2014/11/24 10:47:36 AM	Alabama	Google Chrome	Other		sample-provider=Cint&respondent=3a6f4ac4-8b5a-4c21-9af9-da68584562e0	http://s.cint.com/Survey/Fingerprint/3a6f4ac4-8b5a-4c21-9af9-da68584562e0?sq=1		2079.0	[1, 2, 3, 4, 5, 6, 7, 8, 9]	00:06:49	108.167.122.70					1	2007	8	0	#NULL!	#NULL!	#NULL!	#NULL!	#NULL!	#NULL!	#NULL!	1	3	1	1	0	1	0	0	0	0	0	0	0	0	0	0	0	5
djx2vqwlvi5us31ap0zohky9m46nznnx	1	24812153	en	2014/11/24 7:13:13 AM	2014/11/24 7:21:41 AM	Maryland	Google Chrome	Other		sample-provider=Cint&respondent=d567379e-d861-49ca-8fd8-2ee328e18ff8	http://s.cint.com/Survey/Fingerprint/d567379e-d861-49ca-8fd8-2ee328e18ff8?sq=1		2095.0	[1, 2, 3, 4, 5, 6, 7, 8, 9]	00:08:27	69.137.151.34					0	2005	4	0	#NULL!	#NULL!	#NULL!	#NULL!	#NULL!	#NULL!	#NULL!	0	2	2	1	0	0	0	1	0	0	0	0	0	0	0	0	0	0
brtz9yu7kmrj2gdkdw44kgt0jmmckvja	1	24851287	en	2014/11/24 2:21:57 PM	2014/11/24 2:31:55 PM	Texas	Firefox	Other		sample-provider=Cint&respondent=dd04e325-885c-4640-b5c2-5c3ce46e8413	http://s.cint.com/Survey/Fingerprint/dd04e325-885c-4640-b5c2-5c3ce46e8413		2100.0	[1, 2, 3, 4, 5, 6, 7, 8, 9]	00:09:57	174.130.212.255					1	2006	2	0	#NULL!	#NULL!	#NULL!	4	#NULL!	#NULL!	#NULL!	0	2	1	2	0	2	0	1	0	0	0	0	0	0	0	0	2	2
5w390ldyummnsi7uzffdy1ndd0j2x3ad	1	24858069	en	2014/11/24 3:42:59 PM	2014/11/24 3:50:34 PM	Oklahoma	Google Chrome	Other		sample-provider=Cint&respondent=ac8b0493-8b86-4873-ae4c-916669b997c8	http://s.cint.com/Survey/Fingerprint/ac8b0493-8b86-4873-ae4c-916669b997c8		2099.0	[1, 2, 3, 4, 5, 6, 7, 8, 9]	00:07:35	74.195.226.91					1	2004	7	0	#NULL!	#NULL!	3	#NULL!	#NULL!	#NULL!	#NULL!	0	2	1	0	0	2	1	2	0	0	1	0	2	0	0	0	2	3
zevcxar0omfjiuex0inc9zlv6up512lz	1	24833959	en	2014/11/24 11:28:16 AM	2014/11/24 11:38:36 AM	California	Safari	iPhone/iPod		sample-provider=Cint&respondent=dcadf2a5-1541-42f4-9906-c1092be8f07d	http://s.cint.com/Survey/Fingerprint/dcadf2a5-1541-42f4-9906-c1092be8f07d?sq=1		2110.0	[1, 2, 3, 4, 5, 6, 7, 8, 9]	00:10:20	108.75.132.101					1	2004	11	0	#NULL!	#NULL!	#NULL!	#NULL!	#NULL!	6	#NULL!	0	0	0	1	0	1	1	1	3	3	0	0	1	0	0	0	0	5
d5y8jo2lvtlj29rg2ya9e1ndhymnk8oe	1	24835065	en	2014/11/24 11:39:02 AM	2014/11/24 11:42:57 AM	Illinois	Google Chrome	Other		sample-provider=Cint&respondent=a1512e1b-358d-4102-98e2-d26c76c42a05	http://s.cint.com/Survey/Fingerprint/a1512e1b-358d-4102-98e2-d26c76c42a05?sq=1		2096.0	[1, 2, 3, 4, 5, 6, 7, 8, 9]	00:03:55	50.77.191.165					1	2005	1	0	#NULL!	#NULL!	#NULL!	#NULL!	#NULL!	#NULL!	#NULL!	0	2	2	0	0	1	0	0	0	0	1	0	1	0	0	0	2	4
ygpxuxtpobqztn4msuwntfnlnxc5xdj9	1	24866055	en	2014/11/24 5:46:20 PM	2014/11/24 5:52:36 PM	North Carolina	Google Chrome	Other		sample-provider=Cint&respondent=7ea4dcfa-62b8-4743-8a2c-4c7f2fdcdce0	http://s.cint.com/Survey/Fingerprint/7ea4dcfa-62b8-4743-8a2c-4c7f2fdcdce0?sq=1		2091.0	[1, 2, 3, 4, 5, 6, 7, 8, 9]	00:06:16	98.26.117.132					1	2004	11	#NULL!	#NULL!	2	#NULL!	#NULL!	#NULL!	#NULL!	#NULL!	0	1	1	1	1	1	1	1	0	0	1	0	0	0	0	0	0	3
eruixruo5eh7jrzvhiw7uze5mf6ktnzx	1	24806409	en	2014/11/24 5:51:24 AM	2014/11/24 5:58:10 AM		Firefox	Other		sample-provider=Cint&respondent=5972181b-9aff-4c02-9725-780487bc7912	http://s.cint.com/Survey/Fingerprint/5972181b-9aff-4c02-9725-780487bc7912		2105.0	[1, 2, 3, 4, 5, 6, 7, 8, 9]	00:06:45	10.4.4.230					0	2005	9	0	#NULL!	#NULL!	#NULL!	#NULL!	#NULL!	#NULL!	#NULL!	0	2	2	2	0	2	1	0	0	0	4	0	0	0	0	0	2	3
1ef9ui4zlz65dvskerxhk4ppminv60i3	1	24860095	en	2014/11/24 4:10:59 PM	2014/11/24 4:18:17 PM	Virginia	Safari	iPad		sample-provider=Cint&respondent=ef27bb0b-fd9f-472d-9668-df462cd98dea	http://s.cint.com/Survey/Fingerprint/ef27bb0b-fd9f-472d-9668-df462cd98dea		2087.0	[1, 2, 3, 4, 5, 6, 7, 8, 9]	00:07:17	24.125.213.176					1	2004	8	0	#NULL!	#NULL!	#NULL!	#NULL!	#NULL!	#NULL!	#NULL!	0	2	2	0	0	1	0	0	0	0	1	0	0	0	0	0	0	4
4wx90ps153kmo332rlbxrjqo3dogey4w	1	24815535	en	2014/11/24 8:16:05 AM	2014/11/24 8:23:13 AM	United States	Google Chrome	Android		sample-provider=Cint&respondent=65859ceb-869f-4d3d-80c6-dfedd10cedfe	http://s.cint.com/Survey/Fingerprint/65859ceb-869f-4d3d-80c6-dfedd10cedfe?sq=1		2131.0	[1, 2, 3, 4, 5, 6, 7, 8, 9]	00:07:08	72.88.126.184					0	2003	6	0	#NULL!	#NULL!	#NULL!	#NULL!	#NULL!	#NULL!	#NULL!	0	1	2	5	0	0	0	1	0	0	5	0	0	3	0	0	0	5
7lshdk9rofpb4eg041hm5fkv59jkuxwu	1	24813247	en	2014/11/24 7:32:32 AM	2014/11/24 7:37:49 AM	Florida	Google Chrome	Android		sample-provider=Cint&respondent=7b5e08b5-5bef-4d2b-81df-5a59442a02e5	http://s.cint.com/Survey/Fingerprint/7b5e08b5-5bef-4d2b-81df-5a59442a02e5		2119.0	[1, 2, 3, 4, 5, 6, 7, 8, 9]	00:05:16	73.49.12.154					0	2003	3	0	#NULL!	#NULL!	#NULL!	#NULL!	#NULL!	#NULL!	#NULL!	0	5	5	5	0	0	4	0	0	5	0	0	0	0	0	0	0	0
xd904rz1syo8doielwyo5lcdxvsb6dda	1	24821071	en	2014/11/24 9:29:11 AM	2014/11/24 9:36:35 AM	Nebraska	Safari	Android		sample-provider=Cint&respondent=c964d2cb-e391-4072-b7eb-0bf29016bd46	http://s.cint.com/Survey/Fingerprint/c964d2cb-e391-4072-b7eb-0bf29016bd46?sq=1		2148.0	[1, 2, 3, 4, 5, 6, 7, 8, 9]	00:07:23	66.87.142.229					1	2003	9	#NULL!	#NULL!	2	#NULL!	#NULL!	#NULL!	#NULL!	#NULL!	0	0	0	0	0	1	2	5	0	0	5	1	5	5	1	3	1	2
uh82ay32wnvomzhnanl56ka3vv1pph0o	1	24864215	en	2014/11/24 5:10:06 PM	2014/11/24 5:16:50 PM	Mississippi	Firefox	Other		sample-provider=Cint&respondent=0e7cc602-7bc4-467c-a71c-5d1b2d241a6b	http://s.cint.com/Survey/Fingerprint/0e7cc602-7bc4-467c-a71c-5d1b2d241a6b?sq=1		2127.0	[1, 2, 3, 4, 5, 6, 7, 8, 9]	00:06:44	206.255.98.131					1	2007	1	0	#NULL!	#NULL!	#NULL!	#NULL!	#NULL!	#NULL!	#NULL!	0	4	4	4	0	1	1	1	0	0	4	0	1	0	0	0	0	3
ys1xarlurg98riyfkk4yywi40cc43qbv	1	24826139	en	2014/11/24 10:11:27 AM	2014/11/24 10:49:33 AM	District of Columbia	Google Chrome	Other		sample-provider=Cint&respondent=f8af7624-342d-4287-a489-48319f829592	http://s.cint.com/Survey/Fingerprint/f8af7624-342d-4287-a489-48319f829592?sq=1		2111.0	[1, 2, 3, 4, 5, 6, 7, 8, 9]	00:38:06	156.33.241.7					0	2005	5	0	#NULL!	#NULL!	#NULL!	#NULL!	#NULL!	#NULL!	#NULL!	0	2	2	0	0	1	0	1	0	0	0	0	2	0	0	0	2	2
xw4us47yfwgaqsi8vt2dyhning336bpf	1	24835489	en	2014/11/24 11:42:42 AM	2014/11/24 11:50:38 AM	Louisiana	Internet Explorer	Other		sample-provider=Cint&respondent=1ed998da-8415-48c6-bdfe-d667ba1e26b5	http://s.cint.com/Survey/Fingerprint/1ed998da-8415-48c6-bdfe-d667ba1e26b5?sq=1		2112.0	[1, 2, 3, 4, 5, 6, 7, 8, 9]	00:07:56	74.93.129.141					1	2006	12	0	#NULL!	#NULL!	#NULL!	#NULL!	#NULL!	#NULL!	#NULL!	0	5	2	0	0	0	0	1	0	0	0	0	0	0	0	0	4	2
lb4cwae5udv9csnklpl2r4qupt2nno0d	1	24873825	en	2014/11/24 7:48:07 PM	2014/11/24 7:56:41 PM	United States	Google Chrome	Other		sample-provider=Cint&respondent=9b2b1484-4e7e-4065-8096-c85ea4f7dbb5	http://s.cint.com/Survey/Fingerprint/9b2b1484-4e7e-4065-8096-c85ea4f7dbb5?sq=1		2126.0	[1, 2, 3, 4, 5, 6, 7, 8, 9]	00:08:33	172.191.23.177					1	2003	7	0	#NULL!	#NULL!	#NULL!	#NULL!	#NULL!	#NULL!	#NULL!	0	1	0	1	2	3	3	3	0	0	5	0	0	0	0	0	2	4
fmu8e5nc16tmcxzl5ehk51vc2rc73jf2	1	24887313	en	2014/11/25 12:33:42 AM	2014/11/25 12:38:26 AM	Louisiana	Google Chrome	Android		sample-provider=Cint&respondent=4655984c-160e-4286-b8c8-4c4d7b6c1b80	http://s.cint.com/Survey/Fingerprint/4655984c-160e-4286-b8c8-4c4d7b6c1b80?sq=1		2123.0	[1, 2, 3, 4, 5, 6, 7, 8, 9]	00:03:57	75.131.251.127					1	2005	2	#NULL!	#NULL!	2	#NULL!	#NULL!	#NULL!	#NULL!	#NULL!	1	5	5	5	1	1	0	5	0	2	2	0	0	0	0	0	0	5
carhsdpb1j5t58cj01mkygdotensr518	1	24818183	en	2014/11/24 9:02:28 AM	2014/11/24 9:09:38 AM	United States	Safari	Android		sample-provider=Cint&respondent=31a7e052-5a9d-4a6a-8015-b2c76f327d5e	http://s.cint.com/Survey/Fingerprint/31a7e052-5a9d-4a6a-8015-b2c76f327d5e		2109.0	[1, 2, 3, 4, 5, 6, 7, 8, 9]	00:07:09	68.102.93.110					0	2006	5	0	1	#NULL!	#NULL!	#NULL!	#NULL!	#NULL!	#NULL!	0	1	2	0	0	1	1	1	2	2	0	0	0	1	0	0	0	3
mrxueb2djq49r3bkgxskrotidttc08mo	1	24853131	en	2014/11/24 2:42:59 PM	2014/11/24 2:47:13 PM	South Carolina	Internet Explorer	Other		sample-provider=Cint&respondent=60995458-1223-471d-b588-dade17b83724	http://s.cint.com/Survey/Fingerprint/60995458-1223-471d-b588-dade17b83724?sq=1		2123.0	[1, 2, 3, 4, 5, 6, 7, 8, 9]	00:04:14	64.203.200.246					0	2004	11	0	#NULL!	#NULL!	#NULL!	#NULL!	#NULL!	#NULL!	#NULL!	0	5	3	3	0	1	0	3	0	0	3	0	0	0	0	0	3	2
q1dp7reb26eybx1wra0bcvokosa1j0jd	1	24863033	en	2014/11/24 4:51:33 PM	2014/11/24 5:00:50 PM	Pennsylvania	Firefox	Other		sample-provider=Cint&respondent=ce9fdeda-7880-4085-9bdd-60948e27507a	http://s.cint.com/Survey/Fingerprint/ce9fdeda-7880-4085-9bdd-60948e27507a?sq=1		2081.0	[1, 2, 3, 4, 5, 6, 7, 8, 9]	00:09:17	174.250.113.248					0	2003	10	0	#NULL!	#NULL!	#NULL!	#NULL!	#NULL!	#NULL!	#NULL!	0	2	2	0	0	1	5	2	0	0	2	0	0	0	0	0	0	2
kmc5e623h764ymap3a5od0fie8egwhyx	1	24859225	en	2014/11/24 3:59:17 PM	2014/11/24 4:09:24 PM	Florida	Google Chrome	Android		sample-provider=Cint&respondent=6f3e6fe9-2948-40ec-a146-c243be14182b	http://s.cint.com/Survey/Fingerprint/6f3e6fe9-2948-40ec-a146-c243be14182b		2087.0	[1, 2, 3, 4, 5, 6, 7, 8, 9]	00:10:06	173.209.212.246					0	2005	8	0	#NULL!	#NULL!	#NULL!	#NULL!	#NULL!	#NULL!	#NULL!	0	2	2	0	0	1	1	1	0	0	0	0	0	0	0	0	0	2
0e20xwdsky6ywoqm398uipsvu4ui5v0e	1	24875569	en	2014/11/24 8:23:41 PM	2014/11/24 8:39:19 PM	California	Firefox	Other		sample-provider=Cint&respondent=0cd5cda7-17c3-44fb-bb1b-5cb8a5d07ab8	http://s.cint.com/Survey/Fingerprint/0cd5cda7-17c3-44fb-bb1b-5cb8a5d07ab8		2127.0	[1, 2, 3, 4, 5, 6, 7, 8, 9]	00:15:37	199.231.214.75					1	2006	7	#NULL!	1	#NULL!	#NULL!	#NULL!	#NULL!	#NULL!	#NULL!	1	3	2	3	0	3	2	0	2	3	4	3	2	3	2	0	2	2
qqkmesyy06d9uzi4yh75ublwotspch7y	1	24863291	en	2014/11/24 4:55:06 PM	2014/11/24 5:27:42 PM	Ohio	Google Chrome	Other		sample-provider=Cint&respondent=04b81774-9501-4d3f-b678-63d733345096	http://s.cint.com/Survey/Fingerprint/04b81774-9501-4d3f-b678-63d733345096?sq=1		2124.0	[1, 2, 3, 4, 5, 6, 7, 8, 9]	00:32:34	216.185.63.65					1	2005	10	0	#NULL!	#NULL!	#NULL!	#NULL!	#NULL!	#NULL!	#NULL!	0	0	0	0	0	1	3	0	0	0	1	1	1	0	1	3	3	3
rlt1fsg7n1trlwjyzuqr22afd2zolkvh	1	24839441	en	2014/11/24 12:16:20 PM	2014/11/24 12:21:30 PM	United States	Google Chrome	Other		sample-provider=Cint&respondent=a96db507-5722-44c9-b021-07e9fd9825c5	http://s.cint.com/Survey/Fingerprint/a96db507-5722-44c9-b021-07e9fd9825c5		2119.0	[1, 2, 3, 4, 5, 6, 7, 8, 9]	00:05:10	104.62.141.55					1	2004	6	0	#NULL!	#NULL!	#NULL!	#NULL!	#NULL!	#NULL!	#NULL!	0	3	2	0	0	1	4	0	0	0	0	0	0	0	0	0	0	4
ba52vnwrsjjv1nr9bbut8eprmyay2dkk	1	24868581	en	2014/11/24 6:40:25 PM	2014/11/24 6:58:37 PM	California	Firefox	Other		sample-provider=Cint&respondent=c8dbc4ed-b8b2-4c74-9c9e-365c34b71831	http://s.cint.com/Survey/Fingerprint/c8dbc4ed-b8b2-4c74-9c9e-365c34b71831?sq=1		2118.0	[1, 2, 3, 4, 5, 6, 7, 8, 9]	00:18:12	199.231.212.84					1	2007	6	#NULL!	1	#NULL!	#NULL!	#NULL!	#NULL!	#NULL!	#NULL!	1	2	3	2	0	2	3	0	2	3	2	3	1	2	3	0	1	2
hmj1ly7aavbs68g9arax1ofejuqhkldq	1	24886951	en	2014/11/25 12:16:20 AM	2014/11/25 12:23:21 AM	California	Internet Explorer	Other		sample-provider=Cint&respondent=e3ab28b1-b17d-4fd8-8b27-3e039a03a1b7	http://s.cint.com/Survey/Fingerprint/e3ab28b1-b17d-4fd8-8b27-3e039a03a1b7		2117.0	[1, 2, 3, 4, 5, 6, 7, 8, 9]	00:07:00	162.203.49.213					1	2003	5	#NULL!	#NULL!	#NULL!	#NULL!	4	#NULL!	#NULL!	#NULL!	0	3	3	0	0	1	4	2	0	0	1	0	0	0	0	0	0	3
pf0ku72l4srbmxnlraitohw646zrth1x	1	24811867	en	2014/11/24 7:08:02 AM	2014/11/24 7:12:08 AM	Maryland	Firefox	Other		sample-provider=Cint&respondent=c39f8952-6eba-4cb9-8f0a-a54eadedd5e9	http://s.cint.com/Survey/Fingerprint/c39f8952-6eba-4cb9-8f0a-a54eadedd5e9?sq=1		2110.0	[1, 2, 3, 4, 5, 6, 7, 8, 9]	00:04:05	173.66.185.234					1	2005	1	#NULL!	#NULL!	#NULL!	#NULL!	4	#NULL!	#NULL!	#NULL!	0	1	1	1	1	1	0	1	5	5	1	1	1	0	0	0	2	2
5wi8f1oe26b50jzau23k0cf43kzn93vj	1	24813921	en	2014/11/24 7:46:09 AM	2014/11/24 7:53:31 AM	Indiana	Safari	iPad		sample-provider=Cint&respondent=4abc1e89-af5e-42bf-850e-aa05a84b4f86	http://s.cint.com/Survey/Fingerprint/4abc1e89-af5e-42bf-850e-aa05a84b4f86		2115.0	[1, 2, 3, 4, 5, 6, 7, 8, 9]	00:07:21	184.18.75.108					0	2007	11	0	#NULL!	#NULL!	#NULL!	#NULL!	#NULL!	#NULL!	#NULL!	0	2	0	0	0	3	0	1	0	0	2	1	1	2	1	1	2	2
p76o4cxaq7bdvq01h4ii1iobmlr0r2av	1	24819937	en	2014/11/24 9:13:42 AM	2014/11/24 9:23:14 AM	Illinois	Internet Explorer	Other		sample-provider=Cint&respondent=9aace2c6-48ff-4e86-bc75-f4107d8e4587	http://s.cint.com/Survey/Fingerprint/9aace2c6-48ff-4e86-bc75-f4107d8e4587?sq=1		2115.0	[1, 2, 3, 4, 5, 6, 7, 8, 9]	00:09:31	99.166.148.199					0	2003	12	0	#NULL!	#NULL!	#NULL!	#NULL!	#NULL!	#NULL!	#NULL!	0	2	2	3	0	2	4	1	0	0	0	0	1	0	0	0	0	5
a8cmjpabi3dkoe5wrda3rg3vldpb3p31	1	24818165	en	2014/11/24 9:02:14 AM	2014/11/24 9:10:26 AM	Colorado	Internet Explorer	Other		sample-provider=Cint&respondent=1f88c131-9016-4890-ad23-a84af1257931	http://s.cint.com/Survey/Fingerprint/1f88c131-9016-4890-ad23-a84af1257931		2086.0	[1, 2, 3, 4, 5, 6, 7, 8, 9]	00:08:11	204.9.254.14					1	2004	8	0	#NULL!	#NULL!	#NULL!	#NULL!	#NULL!	#NULL!	#NULL!	0	2	1	0	0	1	0	2	0	0	0	0	0	0	0	0	0	1
fuvz89tvp3zm43i7m4wqnc89voujzp6w	1	24847055	en	2014/11/24 1:35:03 PM	2014/11/24 1:39:57 PM	Alaska	Internet Explorer	Other		sample-provider=Cint&respondent=b39190da-3b59-4a13-839e-5a72af670292	http://s.cint.com/Survey/Fingerprint/b39190da-3b59-4a13-839e-5a72af670292		2084.0	[1, 2, 3, 4, 5, 6, 7, 8, 9]	00:04:53	216.137.221.200					1	2005	3	0	#NULL!	#NULL!	#NULL!	#NULL!	#NULL!	#NULL!	#NULL!	0	3	0	0	0	1	0	0	0	0	0	0	0	0	0	0	0	3
sr8wcpyg6vjfitd8p3ogxfxxn4x7k217	1	24848475	en	2014/11/24 1:50:27 PM	2014/11/24 1:57:55 PM	Minnesota	Internet Explorer	Other		sample-provider=Cint&respondent=9e7634f4-8c76-4669-ba55-2c6e7c65c5d0	http://s.cint.com/Survey/Fingerprint/9e7634f4-8c76-4669-ba55-2c6e7c65c5d0?sq=1		2085.0	[1, 2, 3, 4, 5, 6, 7, 8, 9]	00:07:26	70.40.43.18					1	2003	4	#NULL!	#NULL!	#NULL!	#NULL!	#NULL!	#NULL!	#NULL!	7	0	3	0	0	0	1	1	0	0	0	0	0	1	0	0	0	0	4
48pairkk0ynoifv1rspyev98h10rxpnr	1	24876685	en	2014/11/24 8:44:04 PM	2014/11/24 9:56:40 PM	Alabama	Firefox	Other		sample-provider=Cint&respondent=574a8143-4677-43a9-94d8-54ef3f500dc1	http://s.cint.com/Survey/Fingerprint/574a8143-4677-43a9-94d8-54ef3f500dc1?sq=1		2062.0	[1, 2, 3, 4, 5, 6, 7, 8, 9]	01:12:36	97.82.31.199					0	2007	2	0	#NULL!	#NULL!	#NULL!	#NULL!	#NULL!	#NULL!	#NULL!	0	3	0	0	0	1	0	1	3	0	0	0	0	0	0	0	0	5
26vqc890ik2e90murk4pkntbw6wzw07x	1	24853907	en	2014/11/24 2:52:46 PM	2014/11/24 3:15:47 PM	Maine	Google Chrome	Other		sample-provider=Cint&respondent=c6a57fdd-d853-4f33-b973-0ccb0be5dc8b	http://s.cint.com/Survey/Fingerprint/c6a57fdd-d853-4f33-b973-0ccb0be5dc8b		2092.0	[1, 2, 3, 4, 5, 6, 7, 8, 9]	00:23:01	142.105.201.125					1	2005	8	0	#NULL!	#NULL!	3	#NULL!	#NULL!	#NULL!	#NULL!	0	0	1	0	1	1	3	1	0	0	0	0	0	0	0	0	2	2
rximfepf27nf2yu51egjxy1a9ouaop83	1	24806221	en	2014/11/24 5:48:26 AM	2014/11/24 5:57:35 AM	Texas	Firefox	Other		sample-provider=Cint&respondent=d23ee63a-0f40-4884-bae5-6b714fd40a9a	http://s.cint.com/Survey/Fingerprint/d23ee63a-0f40-4884-bae5-6b714fd40a9a?sq=1		2094.0	[1, 2, 3, 4, 5, 6, 7, 8, 9]	00:09:07	24.175.232.91					0	2006	9	#NULL!	1	#NULL!	#NULL!	#NULL!	#NULL!	#NULL!	#NULL!	0	1	0	0	0	2	0	0	0	0	1	0	0	0	0	0	0	5
f1r6uvgdmck66v02ggqhlwv523bdjl45	1	24874373	en	2014/11/24 7:59:39 PM	2014/11/24 8:04:07 PM	Texas	Safari	iPad		sample-provider=Cint&respondent=79f0ccb8-fa2a-464b-a077-8c21c8d4f4a4	http://s.cint.com/Survey/Fingerprint/79f0ccb8-fa2a-464b-a077-8c21c8d4f4a4?sq=1		2121.0	[1, 2, 3, 4, 5, 6, 7, 8, 9]	00:04:28	98.194.132.120					1	2003	12	0	#NULL!	#NULL!	#NULL!	#NULL!	#NULL!	#NULL!	#NULL!	0	2	1	2	1	1	2	2	1	1	2	1	2	1	0	0	2	5
0ygoze0c4hjq74i1f3yniovekionul6y	1	24879219	en	2014/11/24 9:19:54 PM	2014/11/24 9:22:59 PM	Mississippi	Google Chrome	Other		sample-provider=Cint&respondent=7d0d970a-6411-4567-858b-044dba1cc1de	http://s.cint.com/Survey/Fingerprint/7d0d970a-6411-4567-858b-044dba1cc1de?sq=1		2079.0	[1, 2, 3, 4, 5, 6, 7, 8, 9]	00:03:04	68.54.111.52					1	2003	4	0	#NULL!	#NULL!	#NULL!	#NULL!	#NULL!	#NULL!	#NULL!	0	0	0	0	0	0	0	0	4	4	0	0	0	0	0	0	0	0
1h39bv1949rrv3btd4bw4ynu7tmigqwo	1	24858137	en	2014/11/24 3:43:59 PM	2014/11/24 3:52:50 PM	United States	Safari	iPhone/iPod		sample-provider=Cint&respondent=7f7cdb6f-9c57-4470-881b-1243d4845d0f	http://s.cint.com/Survey/Fingerprint/7f7cdb6f-9c57-4470-881b-1243d4845d0f?sq=1		2116.0	[1, 2, 3, 4, 5, 6, 7, 8, 9]	00:08:50	73.160.234.193					1	2003	9	0	#NULL!	#NULL!	#NULL!	#NULL!	#NULL!	#NULL!	#NULL!	0	1	1	0	0	0	0	1	5	5	3	0	1	2	1	1	0	3
ljlc91jlxi7gjuwjmkhjjz26syde5f1k	1	24837469	en	2014/11/24 11:59:37 AM	2014/11/24 12:06:08 PM	South Carolina	Google Chrome	Android		sample-provider=Cint&respondent=2bdd4413-9fc0-485d-80e5-a5fefe225b44	http://s.cint.com/Survey/Fingerprint/2bdd4413-9fc0-485d-80e5-a5fefe225b44?sq=1		2088.0	[1, 2, 3, 4, 5, 6, 7, 8, 9]	00:06:31	107.203.50.143					1	2003	10	#NULL!	#NULL!	2	#NULL!	#NULL!	#NULL!	#NULL!	#NULL!	0	0	0	0	0	0	0	0	0	0	0	0	0	0	0	0	0	3
f74d14l6l7s3992w9aly656pt3duu6qv	1	24875467	en	2014/11/24 8:21:13 PM	2014/11/24 8:27:15 PM	Alabama	Google Chrome	Other		sample-provider=Cint&respondent=16f6e7a1-e32d-4502-88db-c4fb82766da4	http://s.cint.com/Survey/Fingerprint/16f6e7a1-e32d-4502-88db-c4fb82766da4?sq=1		2080.0	[1, 2, 3, 4, 5, 6, 7, 8, 9]	00:06:01	67.60.181.199					0	2003	8	0	#NULL!	#NULL!	#NULL!	#NULL!	#NULL!	#NULL!	#NULL!	0	2	1	0	0	1	0	2	0	0	0	0	0	0	0	0	0	4
pt9ohylnisw1gro0f6vbrctxv5eg54ps	1	24847393	en	2014/11/24 1:39:39 PM	2014/11/24 2:02:02 PM	Arkansas	Firefox	Other		sample-provider=Cint&respondent=7e546057-bf89-4c41-b4b7-70d802f2cd02	http://s.cint.com/Survey/Fingerprint/7e546057-bf89-4c41-b4b7-70d802f2cd02?sq=1		2083.0	[1, 2, 3, 4, 5, 6, 7, 8, 9]	00:22:23	173.218.21.70					0	2006	10	0	#NULL!	#NULL!	#NULL!	#NULL!	#NULL!	#NULL!	#NULL!	1	1	0	0	0	0	0	1	0	0	1	0	0	2	2	2	0	0
brdlfzfhm78gvbno3yrgxrlmmris9q7g	1	24887687	en	2014/11/25 12:53:23 AM	2014/11/25 1:00:16 AM	Kentucky	Safari	iPhone/iPod		sample-provider=Cint&respondent=8e67ebc2-1cd2-488b-b689-98aac75de57f	http://s.cint.com/Survey/Fingerprint/8e67ebc2-1cd2-488b-b689-98aac75de57f?sq=1		2086.0	[1, 2, 3, 4, 5, 6, 7, 8, 9]	00:06:52	166.137.10.117					0	2003	11	#NULL!	#NULL!	#NULL!	#NULL!	#NULL!	#NULL!	#NULL!	7	0	1	0	0	0	0	0	0	0	0	0	0	0	2	0	0	0	5
[truncated: 110 more columns]
